# Supplementary material for: A short photoperiod alters brain metabolism and cold resistance in Drosophila melanogaster
Source: Research Square preprint supplement (doi:10.21203/rs.3.rs-6800169/v1), 2025-06-27
Supplement: Supplementary file 1 [file df683dbf5cac0ce8b1759846.docx]

**Supplementary material**


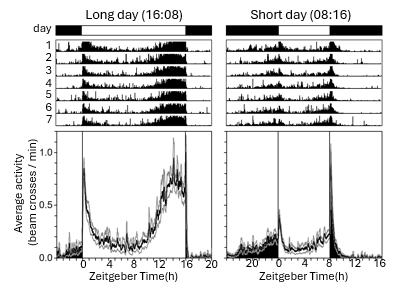


Figure S1: Average actograms and average activity profiles of ~30 male WTCS flies under long and short days. The white and black bars on top of the actograms indicate the light program. The flies were recorded for seven consecutive day and the average activity profiles depict the flies’ mean activity of all seven days (± standard error of the mean).


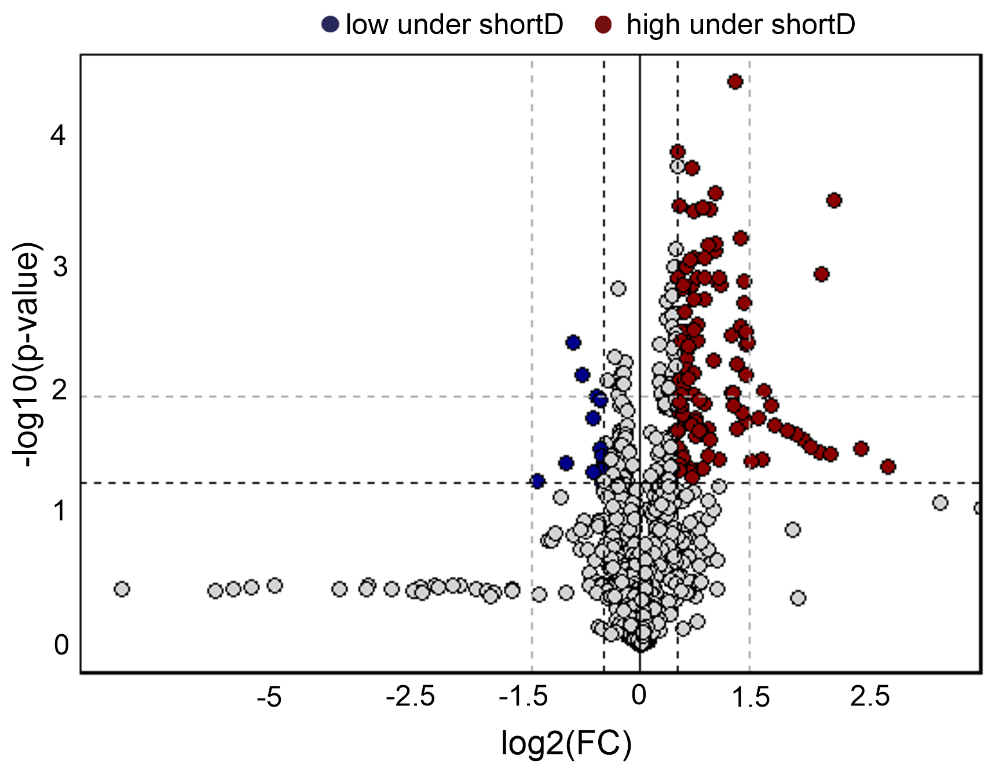


Figure S2: Volcano plot of lipid features in the brain. (Log2FC cutoff= 0.5-1.5 and p-value=0.05-0.01)


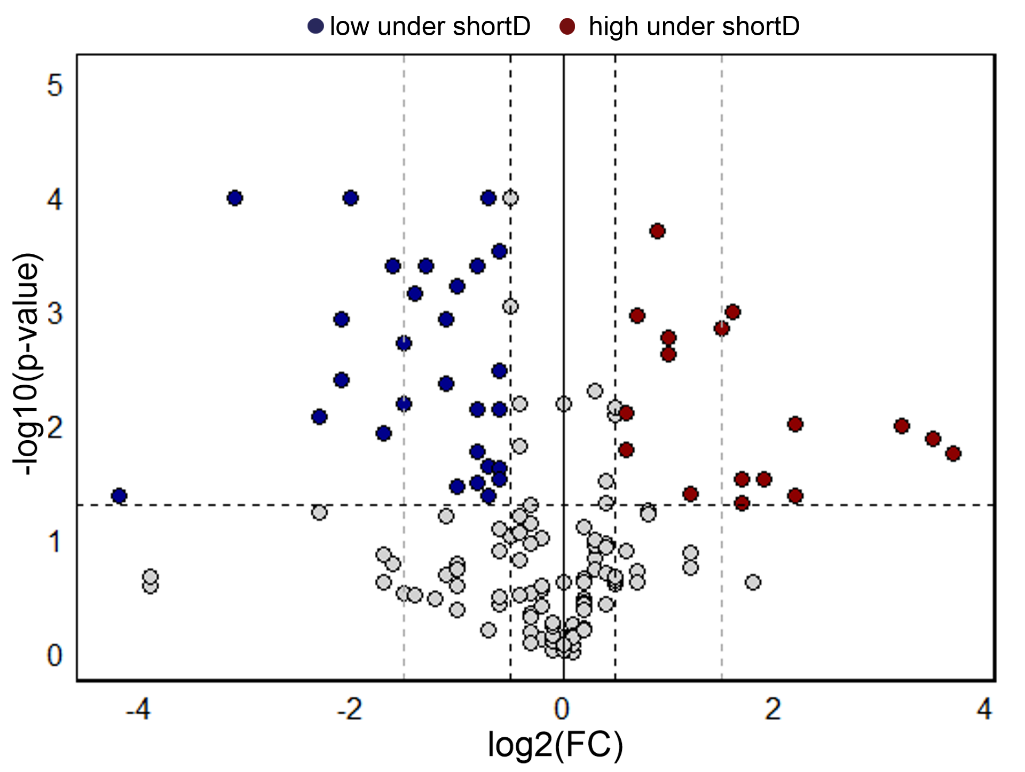


Figure S3: Volcano plot of primary metabolites in the brain. (Log2FC cutoff =1 and p-value= <0.05)

**Table S1**

Annotated lipid features in the body (abdomen and thorax) of Canton-S flies that were reared under short-day and long-day conditions. Each lipid feature ID is defined by its retention time and mass-to-charge ratio. ANOVA p-values were calculated to highlight significant differences (p ≤ 0.05) between short-day and long-day flies, and these are shown in green. Fold changes were calculated by dividing the average values from the five replicates, and these values are shown in the heat map (the highest value is highlighted in red, and the lowest in white). The highest mean indicates the group with the highest averaged peak areas.

| Compound ID | Mass-to-charge ratio | Retention time (min) | Anova (p) | Fold Change | Highest Mean |
| --- | --- | --- | --- | --- | --- |
| 9.27_519.4388m/z | 519.439 | 9.27 | 2.23E-03 | 1.32 | long-day flies |
| 12.07_331.2841m/z | 331.284 | 12.07 | 2.33E-03 | 1.57 | long-day flies |
| 4.71_521.9854m/z | 521.985 | 4.71 | 5.06E-03 | 1.38 | short-day flies |
| 10.37_864.8357m/z | 864.836 | 10.37 | 5.56E-03 | 1.31 | long-day flies |
| 7.62_772.5991m/z | 772.599 | 7.62 | 7.44E-03 | 3.24 | short-day flies |
| 7.05_659.5124m/z | 659.512 | 7.05 | 8.13E-03 | 1.19 | long-day flies |
| 11.77_96.0825m/z | 96.082 | 11.77 | 8.18E-03 | 1.60 | long-day flies |
| 7.70_203.1077m/z | 203.108 | 7.70 | 1.02E-02 | 1.32 | long-day flies |
| 12.42_89.0599m/z | 89.060 | 12.42 | 1.09E-02 | 1.85 | short-day flies |
| 10.65_221.1189m/z | 221.119 | 10.65 | 1.14E-02 | 1.46 | long-day flies |
| 7.89_511.4732m/z | 511.473 | 7.89 | 1.29E-02 | 11.37 | long-day flies |
| 8.60_758.6058m/z | 758.606 | 8.60 | 1.46E-02 | 1.55 | short-day flies |
| 8.29_730.5738m/z | 730.574 | 8.29 | 1.84E-02 | 1.13 | short-day flies |
| 4.71_522.3195m/z | 522.319 | 4.71 | 1.85E-02 | 1.74 | short-day flies |
| 4.33_483.6405m/z | 483.641 | 4.33 | 1.92E-02 | 1.72 | short-day flies |
| 7.40_738.5031m/z | 738.503 | 7.40 | 2.38E-02 | 1.39 | long-day flies |
| 7.35_703.5400m/z | 703.540 | 7.35 | 2.61E-02 | 1.22 | long-day flies |
| 5.52_766.8162m/z | 766.816 | 5.52 | 2.64E-02 | 1.89 | short-day flies |
| 9.45_127.1230m/z | 127.123 | 9.45 | 2.72E-02 | 1.41 | long-day flies |
| 7.56_1048.8705m/z | 1048.870 | 7.56 | 2.74E-02 | 1.79 | short-day flies |
| 4.39_391.3368m/z | 391.337 | 4.39 | 2.82E-02 | 1.61 | long-day flies |
| 13.27_58.0671m/z | 58.067 | 13.27 | 2.85E-02 | 1.92 | short-day flies |
| 5.14_616.7120m/z | 616.712 | 5.14 | 2.87E-02 | 1.67 | short-day flies |
| 5.46_1065.1583m/z | 1065.158 | 5.46 | 3.00E-02 | 1.74 | short-day flies |
| 4.05_434.2478m/z | 434.248 | 4.05 | 3.04E-02 | 1.20 | short-day flies |
| 15.02_685.4366m/z | 685.437 | 15.02 | 3.05E-02 | 1.47 | short-day flies |
| 3.90_353.2664m/z | 353.266 | 3.90 | 3.29E-02 | 1.24 | long-day flies |
| 7.01_804.5533m/z | 804.553 | 7.01 | 3.41E-02 | 1.13 | short-day flies |
| 14.22_153.1386m/z | 153.139 | 14.22 | 3.46E-02 | 1.31 | long-day flies |
| 6.77_531.4079m/z | 531.408 | 6.77 | 3.48E-02 | 10.08 | long-day flies |
| 5.54_1149.7349m/z | 1149.735 | 5.54 | 3.48E-02 | 2.00 | short-day flies |
| 6.76_589.4595m/z | 589.460 | 6.76 | 3.59E-02 | 15.78 | long-day flies |
| 6.87_710.4727m/z | 710.473 | 6.87 | 3.91E-02 | 1.62 | long-day flies |
| 7.12_762.5052m/z | 762.505 | 7.12 | 3.92E-02 | 1.20 | long-day flies |
| 8.03_593.5157m/z | 593.516 | 8.03 | 3.93E-02 | 1.86 | long-day flies |
| 4.33_484.3114m/z | 484.311 | 4.33 | 4.09E-02 | 1.79 | short-day flies |
| 11.66_89.0613m/z | 89.061 | 11.66 | 4.10E-02 | 1.67 | long-day flies |
| 4.82_569.3331m/z | 569.333 | 4.82 | 4.11E-02 | 1.39 | short-day flies |
| 4.72_171.1392m/z | 171.139 | 4.72 | 4.20E-02 | 15.93 | long-day flies |
| 5.52_767.1508m/z | 767.151 | 5.52 | 4.30E-02 | 1.45 | short-day flies |
| 5.44_756.5058m/z | 756.506 | 5.44 | 4.38E-02 | 1.37 | long-day flies |
| 9.98_382.3523m/z | 382.352 | 9.98 | 4.52E-02 | 1.22 | long-day flies |
| 10.68_58.0665m/z | 58.067 | 10.68 | 4.80E-02 | 4.40 | long-day flies |
| 3.92_109.0658m/z | 109.066 | 3.92 | 4.86E-02 | 1.28 | long-day flies |
| 3.92_301.2123m/z | 301.212 | 3.92 | 5.00E-02 | 1.53 | long-day flies |
| 4.71_521.6515m/z | 521.651 | 4.71 | 5.18E-02 | 1.37 | short-day flies |
| 4.81_428.2368m/z | 428.237 | 4.81 | 5.22E-02 | 1.38 | long-day flies |
| 4.71_199.1705m/z | 199.170 | 4.71 | 5.27E-02 | 35.72 | long-day flies |
| 14.72_129.0555m/z | 129.055 | 14.72 | 5.35E-02 | 1.46 | short-day flies |
| 4.33_725.4622m/z | 725.462 | 4.33 | 5.46E-02 | 1.18 | short-day flies |
| 15.07_239.0501m/z | 239.050 | 15.07 | 5.55E-02 | 1.31 | long-day flies |
| 8.37_617.5120m/z | 617.512 | 8.37 | 5.96E-02 | 1.28 | long-day flies |
| 11.40_331.2861m/z | 331.286 | 11.40 | 6.03E-02 | 1.53 | long-day flies |
| 9.38_757.6339m/z | 757.634 | 9.38 | 6.04E-02 | 1.30 | long-day flies |
| 12.68_239.1498m/z | 239.150 | 12.68 | 6.10E-02 | 1.25 | long-day flies |
| 12.80_124.1123m/z | 124.112 | 12.80 | 6.25E-02 | 1.67 | short-day flies |
| 14.19_96.0819m/z | 96.082 | 14.19 | 6.66E-02 | 1.82 | long-day flies |
| 5.77_861.5422m/z | 861.542 | 5.77 | 6.82E-02 | 1.55 | short-day flies |
| 3.90_171.1397m/z | 171.140 | 3.90 | 7.00E-02 | 10.54 | long-day flies |
| 8.73_989.8571m/z | 989.857 | 8.73 | 7.19E-02 | 1.44 | long-day flies |
| 12.39_331.2858m/z | 331.286 | 12.39 | 7.36E-02 | 1.49 | long-day flies |
| 14.26_82.9903m/z | 82.990 | 14.26 | 7.50E-02 | 1.65 | short-day flies |
| 15.08_241.0457m/z | 241.046 | 15.08 | 7.53E-02 | 1.58 | long-day flies |
| 5.46_1065.6605m/z | 1065.660 | 5.46 | 7.68E-02 | 1.33 | short-day flies |
| 9.95_331.2844m/z | 331.284 | 9.95 | 7.71E-02 | 1.43 | long-day flies |
| 7.31_582.4743m/z | 582.474 | 7.31 | 7.99E-02 | 1.38 | short-day flies |
| 5.50_540.3295m/z | 540.329 | 5.50 | 8.16E-02 | 1.52 | short-day flies |
| 9.67_521.4556m/z | 521.456 | 9.67 | 8.30E-02 | 1.15 | long-day flies |
| 8.32_717.6359m/z | 717.636 | 8.32 | 8.44E-02 | 2.28 | short-day flies |
| 7.52_669.5329m/z | 669.533 | 7.52 | 8.60E-02 | 1.17 | long-day flies |
| 5.34_245.1744m/z | 245.174 | 5.34 | 8.62E-02 | 1.71 | short-day flies |
| 11.88_58.0669m/z | 58.067 | 11.88 | 8.69E-02 | 1.71 | long-day flies |
| 8.24_625.5288n | 626.536 | 8.24 | 8.95E-02 | 1.32 | short-day flies |
| 9.41_107.0499m/z | 107.050 | 9.41 | 9.01E-02 | 1.29 | long-day flies |
| 2.07_230.2498m/z | 230.250 | 2.07 | 9.05E-02 | 3.36 | long-day flies |
| 8.28_679.4304m/z | 679.430 | 8.28 | 9.10E-02 | 1.39 | short-day flies |
| 7.73_726.5435m/z | 726.544 | 7.73 | 9.25E-02 | 1.29 | long-day flies |
| 7.20_554.4806m/z | 554.481 | 7.20 | 9.27E-02 | 1.61 | long-day flies |
| 6.92_569.3337m/z | 569.334 | 6.92 | 9.33E-02 | 1.92 | short-day flies |
| 3.38_996.6055m/z | 996.606 | 3.38 | 9.81E-02 | 1.29 | short-day flies |
| 3.11_561.3600m/z | 561.360 | 3.11 | 9.85E-02 | 1.57 | short-day flies |
| 4.71_782.4791m/z | 782.479 | 4.71 | 1.01E-01 | 1.15 | short-day flies |
| 15.07_365.1074m/z | 365.107 | 15.07 | 1.02E-01 | 1.39 | long-day flies |
| 4.37_604.3849m/z | 604.385 | 4.37 | 1.03E-01 | 1.81 | short-day flies |
| 2.97_571.3244m/z | 571.324 | 2.97 | 1.04E-01 | 1.51 | short-day flies |
| 3.89_712.9093m/z | 712.909 | 3.89 | 1.05E-01 | 2.85 | short-day flies |
| 13.85_58.0678m/z | 58.068 | 13.85 | 1.05E-01 | 2.13 | long-day flies |
| 5.90_568.4574m/z | 568.457 | 5.90 | 1.07E-01 | 1.20 | short-day flies |
| 5.14_545.4564m/z | 545.456 | 5.14 | 1.09E-01 | 1.57 | short-day flies |
| 5.53_1150.2336m/z | 1150.234 | 5.53 | 1.09E-01 | 1.67 | short-day flies |
| 7.70_520.5098m/z | 520.510 | 7.70 | 1.10E-01 | 1.53 | short-day flies |
| 5.83_367.3188m/z | 367.319 | 5.83 | 1.10E-01 | 1.48 | short-day flies |
| 14.27_58.0680m/z | 58.068 | 14.27 | 1.12E-01 | 2.64 | short-day flies |
| 2.05_433.1774m/z | 433.177 | 2.05 | 1.12E-01 | 1.25 | short-day flies |
| 11.50_89.0612m/z | 89.061 | 11.50 | 1.12E-01 | 1.39 | long-day flies |
| 9.24_495.4400m/z | 495.440 | 9.24 | 1.13E-01 | 1.16 | long-day flies |
| 3.10_561.8621m/z | 561.862 | 3.10 | 1.13E-01 | 2.18 | short-day flies |
| 5.14_616.0412m/z | 616.041 | 5.14 | 1.16E-01 | 1.22 | short-day flies |
| 9.96_700.6245m/z | 700.625 | 9.96 | 1.17E-01 | 1.13 | long-day flies |
| 12.24_124.1136m/z | 124.114 | 12.24 | 1.17E-01 | 1.46 | short-day flies |
| 9.46_521.4554m/z | 521.455 | 9.46 | 1.17E-01 | 1.13 | long-day flies |
| 2.72_441.7850m/z | 441.785 | 2.72 | 1.18E-01 | 1.33 | short-day flies |
| 5.21_673.0924m/z | 673.092 | 5.21 | 1.19E-01 | 1.33 | short-day flies |
| 9.86_874.7865m/z | 874.786 | 9.86 | 1.20E-01 | 1.12 | long-day flies |
| 7.16_1194.8238m/z | 1194.824 | 7.16 | 1.20E-01 | 1.11 | long-day flies |
| 10.27_984.9038m/z | 984.904 | 10.27 | 1.20E-01 | 1.51 | long-day flies |
| 3.93_703.4514m/z | 703.451 | 3.93 | 1.22E-01 | 1.59 | short-day flies |
| 9.88_853.7201m/z | 853.720 | 9.88 | 1.22E-01 | 1.39 | long-day flies |
| 7.93_770.5802m/z | 770.580 | 7.93 | 1.24E-01 | 1.33 | short-day flies |
| 6.65_779.5472n | 780.554 | 6.65 | 1.25E-01 | 1.23 | short-day flies |
| 4.33_724.9611m/z | 724.961 | 4.33 | 1.27E-01 | 1.21 | short-day flies |
| 5.35_115.0399m/z | 115.040 | 5.35 | 1.27E-01 | 1.30 | short-day flies |
| 2.57_718.5349m/z | 718.535 | 2.57 | 1.27E-01 | 1.83 | long-day flies |
| 6.74_524.3312m/z | 524.331 | 6.74 | 1.28E-01 | 1.18 | short-day flies |
| 7.10_798.5771m/z | 798.577 | 7.10 | 1.28E-01 | 1.43 | long-day flies |
| 15.08_186.9965m/z | 186.996 | 15.08 | 1.28E-01 | 1.14 | long-day flies |
| 5.76_71.0865m/z | 71.087 | 5.76 | 1.29E-01 | 2.20 | short-day flies |
| 11.59_58.0666m/z | 58.067 | 11.59 | 1.29E-01 | 1.60 | short-day flies |
| 8.68_754.6651m/z | 754.665 | 8.68 | 1.30E-01 | 1.75 | short-day flies |
| 9.66_794.8887m/z | 794.889 | 9.66 | 1.31E-01 | 1.21 | long-day flies |
| 7.52_687.5438m/z | 687.544 | 7.52 | 1.34E-01 | 1.06 | long-day flies |
| 8.96_142.1237m/z | 142.124 | 8.96 | 1.34E-01 | 1.56 | short-day flies |
| 9.76_700.6265m/z | 700.626 | 9.76 | 1.35E-01 | 1.18 | long-day flies |
| 2.41_762.5594m/z | 762.559 | 2.41 | 1.35E-01 | 1.30 | short-day flies |
| 4.72_781.9778m/z | 781.978 | 4.72 | 1.35E-01 | 1.17 | short-day flies |
| 5.47_711.1021m/z | 711.102 | 5.47 | 1.35E-01 | 1.27 | short-day flies |
| 5.21_1008.1421m/z | 1008.142 | 5.21 | 1.36E-01 | 1.41 | short-day flies |
| 9.94_660.5857n | 678.621 | 9.94 | 1.37E-01 | 1.21 | short-day flies |
| 11.88_140.1086m/z | 140.109 | 11.88 | 1.39E-01 | 1.48 | short-day flies |
| 10.24_565.5540m/z | 565.554 | 10.24 | 1.42E-01 | 1.38 | long-day flies |
| 2.73_442.2863m/z | 442.286 | 2.73 | 1.42E-01 | 1.33 | short-day flies |
| 12.87_96.0813m/z | 96.081 | 12.87 | 1.44E-01 | 2.62 | short-day flies |
| 9.92_713.6361m/z | 713.636 | 9.92 | 1.44E-01 | 1.23 | long-day flies |
| 10.88_96.0829m/z | 96.083 | 10.88 | 1.47E-01 | 2.12 | long-day flies |
| 4.97_369.3840m/z | 369.384 | 4.97 | 1.48E-01 | 17.48 | long-day flies |
| 9.52_859.7519m/z | 859.752 | 9.52 | 1.49E-01 | 1.10 | long-day flies |
| 2.35_440.3593m/z | 440.359 | 2.35 | 1.49E-01 | 1.41 | long-day flies |
| 3.49_397.2028m/z | 397.203 | 3.49 | 1.49E-01 | 1.30 | short-day flies |
| 8.01_772.6249m/z | 772.625 | 8.01 | 1.50E-01 | 1.27 | short-day flies |
| 2.43_59.0626m/z | 59.063 | 2.43 | 1.50E-01 | 2.40 | short-day flies |
| 7.92_714.5701n | 715.577 | 7.92 | 1.51E-01 | 1.10 | long-day flies |
| 4.05_492.3006m/z | 492.301 | 4.05 | 1.53E-01 | 1.22 | short-day flies |
| 4.70_228.1960m/z | 228.196 | 4.70 | 1.53E-01 | 2.00 | long-day flies |
| 13.66_129.0554m/z | 129.055 | 13.66 | 1.55E-01 | 1.55 | long-day flies |
| 2.93_59.0620m/z | 59.062 | 2.93 | 1.56E-01 | 1.24 | long-day flies |
| 6.88_547.4687m/z | 547.469 | 6.88 | 1.58E-01 | 1.29 | long-day flies |
| 9.36_868.7400m/z | 868.740 | 9.36 | 1.58E-01 | 1.32 | long-day flies |
| 8.30_223.1346m/z | 223.135 | 8.30 | 1.58E-01 | 1.29 | long-day flies |
| 7.87_598.5056m/z | 598.506 | 7.87 | 1.60E-01 | 1.83 | short-day flies |
| 9.86_914.8086n | 915.816 | 9.86 | 1.62E-01 | 1.17 | long-day flies |
| 11.89_283.1765m/z | 283.176 | 11.89 | 1.63E-01 | 1.21 | long-day flies |
| 5.14_923.5669m/z | 923.567 | 5.14 | 1.65E-01 | 1.24 | short-day flies |
| 8.73_802.6326m/z | 802.633 | 8.73 | 1.66E-01 | 1.49 | short-day flies |
| 7.23_661.5280m/z | 661.528 | 7.23 | 1.68E-01 | 1.06 | long-day flies |
| 8.36_313.2744m/z | 313.274 | 8.36 | 1.70E-01 | 1.10 | long-day flies |
| 5.23_1008.6436m/z | 1008.644 | 5.23 | 1.70E-01 | 1.27 | short-day flies |
| 13.58_58.0660m/z | 58.066 | 13.58 | 1.70E-01 | 2.15 | long-day flies |
| 6.27_422.2478m/z | 422.248 | 6.27 | 1.70E-01 | 1.21 | short-day flies |
| 8.10_566.5488m/z | 566.549 | 8.10 | 1.71E-01 | 1.27 | short-day flies |
| 3.36_850.5456m/z | 850.546 | 3.36 | 1.72E-01 | 1.39 | short-day flies |
| 2.82_513.8046m/z | 513.805 | 2.82 | 1.74E-01 | 1.89 | short-day flies |
| 9.31_769.6337m/z | 769.634 | 9.31 | 1.76E-01 | 1.17 | long-day flies |
| 14.27_437.1947m/z | 437.195 | 14.27 | 1.76E-01 | 1.30 | long-day flies |
| 9.43_771.6454m/z | 771.645 | 9.43 | 1.76E-01 | 1.20 | long-day flies |
| 10.17_381.3017m/z | 381.302 | 10.17 | 1.78E-01 | 1.17 | long-day flies |
| 4.44_353.2670m/z | 353.267 | 4.44 | 1.79E-01 | 1.15 | long-day flies |
| 9.14_100.0766m/z | 100.077 | 9.14 | 1.79E-01 | 1.21 | long-day flies |
| 9.39_930.6798m/z | 930.680 | 9.39 | 1.80E-01 | 2.65 | short-day flies |
| 7.71_533.4566m/z | 533.457 | 7.71 | 1.80E-01 | 1.23 | long-day flies |
| 9.24_521.4545m/z | 521.454 | 9.24 | 1.82E-01 | 1.15 | long-day flies |
| 13.12_58.0668m/z | 58.067 | 13.12 | 1.82E-01 | 2.23 | short-day flies |
| 5.13_616.3775m/z | 616.377 | 5.13 | 1.84E-01 | 1.20 | short-day flies |
| 15.07_136.9939n | 179.029 | 15.07 | 1.85E-01 | 1.16 | long-day flies |
| 10.41_934.6482m/z | 934.648 | 10.41 | 1.85E-01 | 1.13 | long-day flies |
| 7.44_601.5176m/z | 601.518 | 7.44 | 1.86E-01 | 1.07 | short-day flies |
| 10.77_99.0825m/z | 99.083 | 10.77 | 1.89E-01 | 2.20 | long-day flies |
| 7.39_544.4596m/z | 544.460 | 7.39 | 1.89E-01 | 1.48 | short-day flies |
| 7.74_55.2909m/z | 55.291 | 7.74 | 1.90E-01 | 1.31 | long-day flies |
| 8.83_713.5707m/z | 713.571 | 8.83 | 1.91E-01 | 1.23 | long-day flies |
| 14.69_82.9897m/z | 82.990 | 14.69 | 1.92E-01 | 1.52 | long-day flies |
| 12.40_107.0860m/z | 107.086 | 12.40 | 1.92E-01 | 1.21 | long-day flies |
| 7.76_127.7362m/z | 127.736 | 7.76 | 1.93E-01 | 1.60 | short-day flies |
| 9.49_791.6988n | 792.706 | 9.49 | 1.93E-01 | 1.10 | long-day flies |
| 5.46_1066.1621m/z | 1066.162 | 5.46 | 1.93E-01 | 1.28 | short-day flies |
| 9.51_818.7225m/z | 818.722 | 9.51 | 1.93E-01 | 1.08 | long-day flies |
| 5.14_924.0686m/z | 924.069 | 5.14 | 1.93E-01 | 1.16 | short-day flies |
| 11.93_153.1379m/z | 153.138 | 11.93 | 1.94E-01 | 1.28 | long-day flies |
| 14.81_551.5044m/z | 551.504 | 14.81 | 1.94E-01 | 1.33 | long-day flies |
| 2.75_454.3726m/z | 454.373 | 2.75 | 1.94E-01 | 1.32 | long-day flies |
| 11.02_82.9916m/z | 82.992 | 11.02 | 1.95E-01 | 1.48 | short-day flies |
| 16.35_224.1296m/z | 224.130 | 16.35 | 1.95E-01 | 1.40 | long-day flies |
| 6.54_858.4882m/z | 858.488 | 6.54 | 1.96E-01 | 1.25 | long-day flies |
| 8.49_800.6178m/z | 800.618 | 8.49 | 1.97E-01 | 1.66 | short-day flies |
| 7.46_56.9839m/z | 56.984 | 7.46 | 1.97E-01 | 1.79 | short-day flies |
| 12.65_89.0620m/z | 89.062 | 12.65 | 1.98E-01 | 1.33 | long-day flies |
| 7.60_730.4297m/z | 730.430 | 7.60 | 1.98E-01 | 1.25 | short-day flies |
| 7.46_804.6253m/z | 804.625 | 7.46 | 1.99E-01 | 1.50 | short-day flies |
| 8.01_339.2907m/z | 339.291 | 8.01 | 2.00E-01 | 1.19 | long-day flies |
| 7.50_709.5262m/z | 709.526 | 7.50 | 2.00E-01 | 2.59 | long-day flies |
| 5.91_303.3059m/z | 303.306 | 5.91 | 2.00E-01 | 1.40 | short-day flies |
| 12.01_89.0599m/z | 89.060 | 12.01 | 2.01E-01 | 1.23 | long-day flies |
| 6.72_726.5048m/z | 726.505 | 6.72 | 2.02E-01 | 1.31 | short-day flies |
| 12.66_129.0560m/z | 129.056 | 12.66 | 2.02E-01 | 1.36 | long-day flies |
| 9.68_819.7300n | 820.737 | 9.68 | 2.03E-01 | 1.08 | long-day flies |
| 2.36_357.2125m/z | 357.212 | 2.36 | 2.03E-01 | 1.43 | short-day flies |
| 9.46_745.6324m/z | 745.632 | 9.46 | 2.03E-01 | 1.24 | long-day flies |
| 7.74_562.5142m/z | 562.514 | 7.74 | 2.03E-01 | 1.18 | long-day flies |
| 9.75_379.3370m/z | 379.337 | 9.75 | 2.03E-01 | 1.12 | short-day flies |
| 6.58_686.4769m/z | 686.477 | 6.58 | 2.04E-01 | 1.22 | short-day flies |
| 8.97_100.0775m/z | 100.077 | 8.97 | 2.04E-01 | 1.26 | long-day flies |
| 6.25_584.4529m/z | 584.453 | 6.25 | 2.05E-01 | 1.38 | short-day flies |
| 2.23_423.3321m/z | 423.332 | 2.23 | 2.05E-01 | 1.18 | long-day flies |
| 8.07_615.4959m/z | 615.496 | 8.07 | 2.09E-01 | 1.33 | long-day flies |
| 14.99_142.1233m/z | 142.123 | 14.99 | 2.09E-01 | 1.16 | long-day flies |
| 9.70_845.7468n | 846.754 | 9.70 | 2.09E-01 | 1.10 | long-day flies |
| 5.75_589.4109m/z | 589.411 | 5.75 | 2.10E-01 | 1.30 | short-day flies |
| 9.72_898.7873m/z | 898.787 | 9.72 | 2.12E-01 | 1.19 | short-day flies |
| 9.31_789.6843n | 790.692 | 9.31 | 2.13E-01 | 1.12 | long-day flies |
| 4.26_159.0666m/z | 159.067 | 4.26 | 2.14E-01 | 1.48 | short-day flies |
| 2.08_419.7720m/z | 419.772 | 2.08 | 2.15E-01 | 1.58 | short-day flies |
| 9.75_683.6016m/z | 683.602 | 9.75 | 2.16E-01 | 1.11 | long-day flies |
| 8.63_221.1190m/z | 221.119 | 8.63 | 2.18E-01 | 1.26 | long-day flies |
| 13.41_82.9910m/z | 82.991 | 13.41 | 2.19E-01 | 1.40 | short-day flies |
| 13.03_775.5553m/z | 775.555 | 13.03 | 2.20E-01 | 1.10 | short-day flies |
| 9.22_743.6164m/z | 743.616 | 9.22 | 2.20E-01 | 1.15 | long-day flies |
| 9.04_699.6023m/z | 699.602 | 9.04 | 2.21E-01 | 1.08 | long-day flies |
| 8.54_381.2983m/z | 381.298 | 8.54 | 2.22E-01 | 1.11 | long-day flies |
| 7.73_50.9729m/z | 50.973 | 7.73 | 2.23E-01 | 2.50 | short-day flies |
| 7.31_263.2746m/z | 263.275 | 7.31 | 2.24E-01 | 1.54 | short-day flies |
| 5.97_735.4987m/z | 735.499 | 5.97 | 2.26E-01 | 1.34 | short-day flies |
| 7.66_715.5754m/z | 715.575 | 7.66 | 2.26E-01 | 1.06 | long-day flies |
| 12.05_96.0806m/z | 96.081 | 12.05 | 2.28E-01 | 1.61 | long-day flies |
| 9.24_712.9996m/z | 713.000 | 9.24 | 2.28E-01 | 1.28 | long-day flies |
| 10.50_892.8698m/z | 892.870 | 10.50 | 2.29E-01 | 1.18 | short-day flies |
| 2.65_393.3216m/z | 393.322 | 2.65 | 2.29E-01 | 1.18 | short-day flies |
| 9.59_682.5932n | 700.627 | 9.59 | 2.29E-01 | 1.10 | long-day flies |
| 9.68_768.7069m/z | 768.707 | 9.68 | 2.32E-01 | 1.13 | long-day flies |
| 9.45_495.4395m/z | 495.439 | 9.45 | 2.32E-01 | 1.12 | long-day flies |
| 8.37_339.2900m/z | 339.290 | 8.37 | 2.33E-01 | 1.14 | long-day flies |
| 10.54_1195.1318m/z | 1195.132 | 10.54 | 2.33E-01 | 1.13 | short-day flies |
| 9.68_523.4695m/z | 523.470 | 9.68 | 2.33E-01 | 1.22 | long-day flies |
| 10.23_944.8658m/z | 944.866 | 10.23 | 2.34E-01 | 1.21 | short-day flies |
| 4.15_640.3882m/z | 640.388 | 4.15 | 2.35E-01 | 1.19 | short-day flies |
| 10.23_215.0850m/z | 215.085 | 10.23 | 2.36E-01 | 1.34 | long-day flies |
| 9.86_796.7375m/z | 796.738 | 9.86 | 2.36E-01 | 1.13 | long-day flies |
| 4.32_247.2424m/z | 247.242 | 4.32 | 2.36E-01 | 1.22 | short-day flies |
| 13.25_129.0556m/z | 129.056 | 13.25 | 2.36E-01 | 1.42 | short-day flies |
| 2.54_226.2172m/z | 226.217 | 2.54 | 2.37E-01 | 2.45 | long-day flies |
| 9.63_799.6768m/z | 799.677 | 9.63 | 2.39E-01 | 1.16 | long-day flies |
| 8.28_652.5532m/z | 652.553 | 8.28 | 2.39E-01 | 1.26 | short-day flies |
| 8.30_1078.9771m/z | 1078.977 | 8.30 | 2.39E-01 | 1.39 | short-day flies |
| 7.61_729.4240m/z | 729.424 | 7.61 | 2.39E-01 | 1.79 | short-day flies |
| 8.69_645.5460m/z | 645.546 | 8.69 | 2.40E-01 | 1.28 | short-day flies |
| 10.30_934.6461m/z | 934.646 | 10.30 | 2.40E-01 | 1.14 | long-day flies |
| 6.79_377.3785m/z | 377.379 | 6.79 | 2.41E-01 | 1.99 | short-day flies |
| 6.53_753.5318n | 754.539 | 6.53 | 2.46E-01 | 1.16 | short-day flies |
| 15.06_721.5077m/z | 721.508 | 15.06 | 2.46E-01 | 1.12 | long-day flies |
| 8.54_695.5956m/z | 695.596 | 8.54 | 2.46E-01 | 1.27 | long-day flies |
| 15.08_104.9932m/z | 104.993 | 15.08 | 2.47E-01 | 1.09 | long-day flies |
| 4.83_578.7006m/z | 578.701 | 4.83 | 2.48E-01 | 1.37 | short-day flies |
| 6.54_576.4831m/z | 576.483 | 6.54 | 2.49E-01 | 2.19 | long-day flies |
| 3.64_583.3730m/z | 583.373 | 3.64 | 2.49E-01 | 1.14 | short-day flies |
| 7.81_728.5598m/z | 728.560 | 7.81 | 2.49E-01 | 1.13 | long-day flies |
| 9.66_793.7147n | 794.722 | 9.66 | 2.50E-01 | 1.09 | long-day flies |
| 8.98_689.5688m/z | 689.569 | 8.98 | 2.52E-01 | 1.10 | long-day flies |
| 6.65_678.5072m/z | 678.507 | 6.65 | 2.52E-01 | 1.52 | short-day flies |
| 9.92_666.6184m/z | 666.618 | 9.92 | 2.53E-01 | 1.17 | short-day flies |
| 7.53_751.5305m/z | 751.530 | 7.53 | 2.53E-01 | 1.45 | short-day flies |
| 9.83_853.7208m/z | 853.721 | 9.83 | 2.54E-01 | 1.24 | long-day flies |
| 10.18_980.8892m/z | 980.889 | 10.18 | 2.55E-01 | 1.63 | long-day flies |
| 5.42_231.1613m/z | 231.161 | 5.42 | 2.56E-01 | 1.67 | short-day flies |
| 5.76_381.2984m/z | 381.298 | 5.76 | 2.56E-01 | 1.14 | long-day flies |
| 7.46_135.6037m/z | 135.604 | 7.46 | 2.57E-01 | 1.22 | short-day flies |
| 14.98_589.3287m/z | 589.329 | 14.98 | 2.58E-01 | 1.18 | long-day flies |
| 9.45_765.6828n | 766.690 | 9.45 | 2.59E-01 | 1.10 | long-day flies |
| 8.17_772.5874m/z | 772.587 | 8.17 | 2.60E-01 | 1.24 | short-day flies |
| 8.00_285.2443m/z | 285.244 | 8.00 | 2.61E-01 | 1.16 | long-day flies |
| 8.78_647.6087m/z | 647.609 | 8.78 | 2.62E-01 | 2.36 | short-day flies |
| 6.80_123.0805m/z | 123.081 | 6.80 | 2.62E-01 | 1.31 | short-day flies |
| 2.54_542.4268m/z | 542.427 | 2.54 | 2.63E-01 | 1.11 | long-day flies |
| 11.16_58.0651m/z | 58.065 | 11.16 | 2.63E-01 | 1.69 | long-day flies |
| 2.05_384.7693m/z | 384.769 | 2.05 | 2.64E-01 | 1.27 | long-day flies |
| 3.64_1165.7576m/z | 1165.758 | 3.64 | 2.64E-01 | 1.32 | short-day flies |
| 3.50_531.2751m/z | 531.275 | 3.50 | 2.65E-01 | 1.10 | short-day flies |
| 9.24_59.0621m/z | 59.062 | 9.24 | 2.67E-01 | 1.08 | long-day flies |
| 5.74_319.3366m/z | 319.337 | 5.74 | 2.68E-01 | 1.20 | short-day flies |
| 9.25_493.4245m/z | 493.424 | 9.25 | 2.68E-01 | 1.11 | long-day flies |
| 13.35_82.9908m/z | 82.991 | 13.35 | 2.68E-01 | 1.69 | short-day flies |
| 5.21_540.4264m/z | 540.426 | 5.21 | 2.70E-01 | 1.14 | short-day flies |
| 9.59_107.0496m/z | 107.050 | 9.59 | 2.71E-01 | 1.14 | long-day flies |
| 11.30_89.0603m/z | 89.060 | 11.30 | 2.72E-01 | 1.36 | short-day flies |
| 3.02_557.2945m/z | 557.295 | 3.02 | 2.72E-01 | 1.23 | short-day flies |
| 5.42_147.0663m/z | 147.066 | 5.42 | 2.74E-01 | 1.41 | short-day flies |
| 3.91_551.4335m/z | 551.434 | 3.91 | 2.75E-01 | 1.36 | long-day flies |
| 7.69_337.2724m/z | 337.272 | 7.69 | 2.75E-01 | 1.28 | long-day flies |
| 8.37_577.5220m/z | 577.522 | 8.37 | 2.77E-01 | 1.15 | long-day flies |
| 9.55_895.7643n | 896.772 | 9.55 | 2.78E-01 | 1.19 | short-day flies |
| 5.62_427.2518m/z | 427.252 | 5.62 | 2.78E-01 | 1.19 | short-day flies |
| 9.27_763.6680n | 764.675 | 9.27 | 2.78E-01 | 1.10 | long-day flies |
| 2.25_335.2726m/z | 335.273 | 2.25 | 2.79E-01 | 1.43 | long-day flies |
| 6.66_838.6102m/z | 838.610 | 6.66 | 2.79E-01 | 1.45 | short-day flies |
| 9.60_858.7562m/z | 858.756 | 9.60 | 2.79E-01 | 1.67 | short-day flies |
| 8.59_535.5453m/z | 535.545 | 8.59 | 2.79E-01 | 1.26 | short-day flies |
| 8.46_466.4623m/z | 466.462 | 8.46 | 2.80E-01 | 1.16 | short-day flies |
| 10.16_763.7530m/z | 763.753 | 10.16 | 2.81E-01 | 1.38 | short-day flies |
| 15.07_170.1299m/z | 170.130 | 15.07 | 2.81E-01 | 1.13 | long-day flies |
| 5.32_293.2869m/z | 293.287 | 5.32 | 2.82E-01 | 1.50 | short-day flies |
| 4.49_540.3591m/z | 540.359 | 4.49 | 2.82E-01 | 1.30 | short-day flies |
| 8.29_680.4805m/z | 680.481 | 8.29 | 2.83E-01 | 1.06 | long-day flies |
| 8.10_624.6069m/z | 624.607 | 8.10 | 2.84E-01 | 1.40 | short-day flies |
| 5.42_101.0599m/z | 101.060 | 5.42 | 2.87E-01 | 1.53 | short-day flies |
| 12.59_133.0872m/z | 133.087 | 12.59 | 2.87E-01 | 1.18 | long-day flies |
| 5.69_565.4832m/z | 565.483 | 5.69 | 2.87E-01 | 1.37 | short-day flies |
| 5.42_171.1026m/z | 171.103 | 5.42 | 2.87E-01 | 1.38 | short-day flies |
| 9.21_717.6002m/z | 717.600 | 9.21 | 2.88E-01 | 1.13 | long-day flies |
| 2.07_59.0617m/z | 59.062 | 2.07 | 2.89E-01 | 1.57 | short-day flies |
| 5.68_547.4721m/z | 547.472 | 5.68 | 2.89E-01 | 1.34 | short-day flies |
| 8.23_257.2476m/z | 257.248 | 8.23 | 2.89E-01 | 1.47 | long-day flies |
| 9.92_367.3367m/z | 367.337 | 9.92 | 2.89E-01 | 1.20 | short-day flies |
| 2.74_882.5719m/z | 882.572 | 2.74 | 2.89E-01 | 1.22 | short-day flies |
| 5.42_259.1919m/z | 259.192 | 5.42 | 2.89E-01 | 1.41 | short-day flies |
| 6.83_564.4294m/z | 564.429 | 6.83 | 2.90E-01 | 15.11 | long-day flies |
| 15.07_248.0607m/z | 248.061 | 15.07 | 2.91E-01 | 1.40 | short-day flies |
| 14.12_96.0801m/z | 96.080 | 14.12 | 2.92E-01 | 1.44 | short-day flies |
| 9.07_751.6571m/z | 751.657 | 9.07 | 2.96E-01 | 1.11 | long-day flies |
| 2.92_500.2766m/z | 500.277 | 2.92 | 2.96E-01 | 1.13 | short-day flies |
| 3.65_583.8747m/z | 583.875 | 3.65 | 2.97E-01 | 1.13 | short-day flies |
| 3.40_407.3362m/z | 407.336 | 3.40 | 2.98E-01 | 1.36 | long-day flies |
| 2.78_482.3716m/z | 482.372 | 2.78 | 2.98E-01 | 1.68 | long-day flies |
| 5.98_956.2690m/z | 956.269 | 5.98 | 2.98E-01 | 1.58 | short-day flies |
| 3.43_439.3034m/z | 439.303 | 3.43 | 2.99E-01 | 1.18 | short-day flies |
| 10.59_381.2981m/z | 381.298 | 10.59 | 2.99E-01 | 1.11 | long-day flies |
| 8.95_685.4355m/z | 685.436 | 8.95 | 2.99E-01 | 1.26 | short-day flies |
| 4.83_867.0531m/z | 867.053 | 4.83 | 2.99E-01 | 1.16 | short-day flies |
| 5.42_111.0450m/z | 111.045 | 5.42 | 2.99E-01 | 1.37 | short-day flies |
| 12.12_331.2845m/z | 331.285 | 12.12 | 3.00E-01 | 1.15 | short-day flies |
| 9.11_91.0328n | 109.067 | 9.11 | 3.00E-01 | 1.09 | short-day flies |
| 10.23_862.8225m/z | 862.822 | 10.23 | 3.01E-01 | 1.10 | short-day flies |
| 8.01_1155.9781m/z | 1155.978 | 8.01 | 3.01E-01 | 1.22 | long-day flies |
| 3.75_712.4099m/z | 712.410 | 3.75 | 3.01E-01 | 1.33 | short-day flies |
| 11.86_82.9904m/z | 82.990 | 11.86 | 3.02E-01 | 1.24 | short-day flies |
| 10.30_906.8502m/z | 906.850 | 10.30 | 3.02E-01 | 1.10 | short-day flies |
| 9.12_123.0814m/z | 123.081 | 9.12 | 3.02E-01 | 1.10 | long-day flies |
| 4.48_444.3810m/z | 444.381 | 4.48 | 3.03E-01 | 2.27 | long-day flies |
| 8.37_594.5235n | 612.557 | 8.37 | 3.04E-01 | 1.13 | long-day flies |
| 4.96_634.4142m/z | 634.414 | 4.96 | 3.04E-01 | 1.78 | short-day flies |
| 7.79_721.5068m/z | 721.507 | 7.79 | 3.05E-01 | 1.06 | long-day flies |
| 15.07_433.0059m/z | 433.006 | 15.07 | 3.05E-01 | 1.34 | short-day flies |
| 3.81_169.0861m/z | 169.086 | 3.81 | 3.06E-01 | 1.18 | long-day flies |
| 6.05_650.4799m/z | 650.480 | 6.05 | 3.07E-01 | 1.34 | short-day flies |
| 11.13_89.0605m/z | 89.061 | 11.13 | 3.08E-01 | 1.39 | long-day flies |
| 5.42_241.1811m/z | 241.181 | 5.42 | 3.09E-01 | 1.37 | short-day flies |
| 8.00_1156.9842m/z | 1156.984 | 8.00 | 3.11E-01 | 1.23 | long-day flies |
| 12.25_171.1496m/z | 171.150 | 12.25 | 3.11E-01 | 1.25 | long-day flies |
| 8.28_507.5137m/z | 507.514 | 8.28 | 3.11E-01 | 1.26 | short-day flies |
| 7.30_67.0554m/z | 67.055 | 7.30 | 3.12E-01 | 1.37 | short-day flies |
| 7.47_772.5875m/z | 772.587 | 7.47 | 3.13E-01 | 1.41 | short-day flies |
| 9.24_467.4090m/z | 467.409 | 9.24 | 3.14E-01 | 1.09 | long-day flies |
| 5.42_370.3091n | 371.316 | 5.42 | 3.16E-01 | 1.36 | short-day flies |
| 14.20_58.0665m/z | 58.066 | 14.20 | 3.16E-01 | 1.51 | long-day flies |
| 2.62_247.2281m/z | 247.228 | 2.62 | 3.17E-01 | 1.19 | short-day flies |
| 6.72_633.4967m/z | 633.497 | 6.72 | 3.17E-01 | 1.14 | long-day flies |
| 8.65_785.6196m/z | 785.620 | 8.65 | 3.18E-01 | 1.16 | short-day flies |
| 12.71_221.1187m/z | 221.119 | 12.71 | 3.18E-01 | 1.12 | long-day flies |
| 4.84_866.5515m/z | 866.552 | 4.84 | 3.19E-01 | 1.15 | short-day flies |
| 4.14_640.8896m/z | 640.890 | 4.14 | 3.19E-01 | 1.14 | short-day flies |
| 6.35_652.4339n | 670.469 | 6.35 | 3.19E-01 | 1.12 | short-day flies |
| 2.92_365.2659m/z | 365.266 | 2.92 | 3.20E-01 | 1.18 | short-day flies |
| 10.02_825.7752m/z | 825.775 | 10.02 | 3.20E-01 | 1.11 | long-day flies |
| 9.08_735.6371n | 736.644 | 9.08 | 3.20E-01 | 1.12 | long-day flies |
| 9.01_493.4251m/z | 493.425 | 9.01 | 3.20E-01 | 1.13 | long-day flies |
| 15.02_473.2662m/z | 473.266 | 15.02 | 3.21E-01 | 1.09 | long-day flies |
| 6.92_427.2515m/z | 427.251 | 6.92 | 3.22E-01 | 1.15 | short-day flies |
| 8.22_936.7059m/z | 936.706 | 8.22 | 3.22E-01 | 1.34 | long-day flies |
| 5.53_767.4836m/z | 767.484 | 5.53 | 3.23E-01 | 1.24 | short-day flies |
| 4.03_385.2877m/z | 385.288 | 4.03 | 3.23E-01 | 1.49 | short-day flies |
| 8.85_711.6241m/z | 711.624 | 8.85 | 3.24E-01 | 1.07 | short-day flies |
| 9.38_894.7583m/z | 894.758 | 9.38 | 3.25E-01 | 1.28 | short-day flies |
| 13.23_124.1126m/z | 124.113 | 13.23 | 3.26E-01 | 1.65 | long-day flies |
| 5.42_129.0553m/z | 129.055 | 5.42 | 3.26E-01 | 1.33 | short-day flies |
| 3.36_498.8001m/z | 498.800 | 3.36 | 3.27E-01 | 1.22 | short-day flies |
| 6.70_171.1030m/z | 171.103 | 6.70 | 3.27E-01 | 1.56 | long-day flies |
| 15.04_321.1319m/z | 321.132 | 15.04 | 3.27E-01 | 1.15 | short-day flies |
| 5.18_757.4298m/z | 757.430 | 5.18 | 3.28E-01 | 1.37 | short-day flies |
| 3.57_275.2602m/z | 275.260 | 3.57 | 3.29E-01 | 1.41 | short-day flies |
| 15.07_138.9923n | 181.026 | 15.07 | 3.29E-01 | 1.14 | long-day flies |
| 2.95_289.1480m/z | 289.148 | 2.95 | 3.29E-01 | 1.18 | short-day flies |
| 5.68_744.5404n | 745.548 | 5.68 | 3.30E-01 | 1.31 | short-day flies |
| 3.43_399.3114m/z | 399.311 | 3.43 | 3.30E-01 | 1.13 | short-day flies |
| 7.56_512.4450n | 530.479 | 7.56 | 3.31E-01 | 1.21 | short-day flies |
| 7.00_782.5692m/z | 782.569 | 7.00 | 3.32E-01 | 1.08 | short-day flies |
| 13.05_416.2160m/z | 416.216 | 13.05 | 3.32E-01 | 1.09 | short-day flies |
| 2.32_291.2524m/z | 291.252 | 2.32 | 3.34E-01 | 1.24 | short-day flies |
| 7.31_303.3059m/z | 303.306 | 7.31 | 3.34E-01 | 1.35 | short-day flies |
| 2.38_201.1131m/z | 201.113 | 2.38 | 3.35E-01 | 1.59 | short-day flies |
| 13.33_135.0811m/z | 135.081 | 13.33 | 3.37E-01 | 1.24 | long-day flies |
| 10.29_109.0679m/z | 109.068 | 10.29 | 3.38E-01 | 1.42 | long-day flies |
| 13.90_685.4352m/z | 685.435 | 13.90 | 3.38E-01 | 1.22 | long-day flies |
| 14.98_381.2984m/z | 381.298 | 14.98 | 3.38E-01 | 1.07 | long-day flies |
| 5.13_311.2599m/z | 311.260 | 5.13 | 3.38E-01 | 1.13 | short-day flies |
| 7.93_796.6257m/z | 796.626 | 7.93 | 3.40E-01 | 1.25 | long-day flies |
| 7.76_603.5337m/z | 603.534 | 7.76 | 3.41E-01 | 1.07 | long-day flies |
| 7.74_407.4229m/z | 407.423 | 7.74 | 3.41E-01 | 1.52 | short-day flies |
| 3.10_571.3247m/z | 571.325 | 3.10 | 3.41E-01 | 1.51 | short-day flies |
| 6.92_739.5253m/z | 739.525 | 6.92 | 3.42E-01 | 1.22 | long-day flies |
| 11.56_128.1078m/z | 128.108 | 11.56 | 3.42E-01 | 1.22 | short-day flies |
| 15.00_215.0876m/z | 215.088 | 15.00 | 3.43E-01 | 1.21 | short-day flies |
| 9.25_737.6520n | 738.659 | 9.25 | 3.43E-01 | 1.09 | long-day flies |
| 8.08_383.3146m/z | 383.315 | 8.08 | 3.46E-01 | 1.28 | long-day flies |
| 11.21_96.0799m/z | 96.080 | 11.21 | 3.47E-01 | 1.23 | long-day flies |
| 9.84_847.7619n | 848.769 | 9.84 | 3.49E-01 | 1.06 | long-day flies |
| 6.53_439.3783m/z | 439.378 | 6.53 | 3.50E-01 | 1.13 | short-day flies |
| 10.82_58.0667m/z | 58.067 | 10.82 | 3.52E-01 | 1.29 | long-day flies |
| 9.24_711.6361n | 712.643 | 9.24 | 3.53E-01 | 1.09 | long-day flies |
| 16.53_224.1297m/z | 224.130 | 16.53 | 3.53E-01 | 1.38 | long-day flies |
| 7.60_538.4598n | 556.494 | 7.60 | 3.53E-01 | 1.13 | long-day flies |
| 5.73_804.8226m/z | 804.823 | 5.73 | 3.54E-01 | 1.51 | short-day flies |
| 7.09_599.5014m/z | 599.501 | 7.09 | 3.55E-01 | 1.13 | long-day flies |
| 4.84_578.3674m/z | 578.367 | 4.84 | 3.55E-01 | 1.20 | short-day flies |
| 9.20_963.7032m/z | 963.703 | 9.20 | 3.56E-01 | 1.15 | long-day flies |
| 7.20_766.5808m/z | 766.581 | 7.20 | 3.57E-01 | 1.32 | short-day flies |
| 9.01_692.5944n | 710.628 | 9.01 | 3.58E-01 | 1.11 | long-day flies |
| 7.30_247.2527n | 265.287 | 7.30 | 3.59E-01 | 1.21 | short-day flies |
| 4.95_635.0844m/z | 635.084 | 4.95 | 3.59E-01 | 1.88 | short-day flies |
| 5.42_301.2388m/z | 301.239 | 5.42 | 3.60E-01 | 1.29 | short-day flies |
| 2.37_713.4234m/z | 713.423 | 2.37 | 3.61E-01 | 1.12 | short-day flies |
| 7.04_641.5013m/z | 641.501 | 7.04 | 3.62E-01 | 1.16 | long-day flies |
| 4.57_109.0669m/z | 109.067 | 4.57 | 3.63E-01 | 1.23 | short-day flies |
| 2.45_274.2748m/z | 274.275 | 2.45 | 3.63E-01 | 1.03 | long-day flies |
| 5.47_710.7681m/z | 710.768 | 5.47 | 3.63E-01 | 1.17 | short-day flies |
| 2.12_567.3656m/z | 567.366 | 2.12 | 3.65E-01 | 1.14 | short-day flies |
| 8.73_990.8586m/z | 990.859 | 8.73 | 3.65E-01 | 1.25 | long-day flies |
| 7.17_706.5386m/z | 706.539 | 7.17 | 3.65E-01 | 1.22 | short-day flies |
| 11.34_97.0676m/z | 97.068 | 11.34 | 3.65E-01 | 1.37 | long-day flies |
| 7.71_546.5214m/z | 546.521 | 7.71 | 3.66E-01 | 1.19 | long-day flies |
| 14.88_133.0869m/z | 133.087 | 14.88 | 3.66E-01 | 1.24 | short-day flies |
| 8.30_107.0494m/z | 107.049 | 8.30 | 3.66E-01 | 1.06 | long-day flies |
| 12.75_128.1091m/z | 128.109 | 12.75 | 3.67E-01 | 1.17 | long-day flies |
| 4.30_413.3263m/z | 413.326 | 4.30 | 3.69E-01 | 1.19 | short-day flies |
| 3.88_668.4476m/z | 668.448 | 3.88 | 3.69E-01 | 1.25 | short-day flies |
| 10.25_56.0511m/z | 56.051 | 10.25 | 3.69E-01 | 1.22 | long-day flies |
| 2.62_89.0612m/z | 89.061 | 2.62 | 3.70E-01 | 1.10 | short-day flies |
| 9.46_739.6679n | 740.675 | 9.46 | 3.70E-01 | 1.08 | long-day flies |
| 3.39_454.2936m/z | 454.294 | 3.39 | 3.72E-01 | 1.32 | short-day flies |
| 9.19_1004.7283m/z | 1004.728 | 9.19 | 3.73E-01 | 1.14 | long-day flies |
| 7.90_624.5204m/z | 624.520 | 7.90 | 3.74E-01 | 1.38 | short-day flies |
| 9.86_1055.9058m/z | 1055.906 | 9.86 | 3.75E-01 | 1.35 | long-day flies |
| 5.69_309.2434m/z | 309.243 | 5.69 | 3.76E-01 | 1.28 | short-day flies |
| 7.69_473.3988m/z | 473.399 | 7.69 | 3.76E-01 | 1.14 | long-day flies |
| 4.78_387.3036m/z | 387.304 | 4.78 | 3.76E-01 | 1.75 | short-day flies |
| 7.63_610.1851m/z | 610.185 | 7.63 | 3.76E-01 | 1.18 | short-day flies |
| 9.77_142.1241m/z | 142.124 | 9.77 | 3.77E-01 | 1.19 | short-day flies |
| 2.34_301.1421m/z | 301.142 | 2.34 | 3.80E-01 | 1.30 | short-day flies |
| 7.66_447.4197m/z | 447.420 | 7.66 | 3.80E-01 | 1.28 | short-day flies |
| 6.73_762.5757m/z | 762.576 | 6.73 | 3.80E-01 | 1.14 | short-day flies |
| 13.62_96.0812m/z | 96.081 | 13.62 | 3.80E-01 | 1.51 | long-day flies |
| 9.09_761.6532n | 762.660 | 9.09 | 3.81E-01 | 1.12 | long-day flies |
| 7.34_115.6995m/z | 115.699 | 7.34 | 3.83E-01 | 1.36 | short-day flies |
| 14.79_353.2669m/z | 353.267 | 14.79 | 3.83E-01 | 1.07 | long-day flies |
| 2.14_219.1752m/z | 219.175 | 2.14 | 3.84E-01 | 1.26 | long-day flies |
| 3.50_589.3283m/z | 589.328 | 3.50 | 3.84E-01 | 1.08 | short-day flies |
| 7.53_518.4927m/z | 518.493 | 7.53 | 3.85E-01 | 1.15 | long-day flies |
| 8.65_760.6198m/z | 760.620 | 8.65 | 3.85E-01 | 1.09 | short-day flies |
| 10.16_956.8679m/z | 956.868 | 10.16 | 3.86E-01 | 1.18 | long-day flies |
| 7.37_580.4944m/z | 580.494 | 7.37 | 3.87E-01 | 1.32 | long-day flies |
| 7.25_586.4386m/z | 586.439 | 7.25 | 3.88E-01 | 1.28 | short-day flies |
| 8.01_728.5602m/z | 728.560 | 8.01 | 3.88E-01 | 1.07 | short-day flies |
| 5.29_381.2984m/z | 381.298 | 5.29 | 3.88E-01 | 1.11 | long-day flies |
| 9.12_696.6563m/z | 696.656 | 9.12 | 3.89E-01 | 1.14 | long-day flies |
| 2.85_227.2012m/z | 227.201 | 2.85 | 3.89E-01 | 1.73 | long-day flies |
| 7.30_712.4893m/z | 712.489 | 7.30 | 3.89E-01 | 1.18 | long-day flies |
| 7.66_524.4677m/z | 524.468 | 7.66 | 3.90E-01 | 1.21 | short-day flies |
| 8.11_205.1246m/z | 205.125 | 8.11 | 3.90E-01 | 1.10 | short-day flies |
| 15.07_86.0720m/z | 86.072 | 15.07 | 3.91E-01 | 1.14 | long-day flies |
| 9.12_267.2664m/z | 267.266 | 9.12 | 3.91E-01 | 1.21 | long-day flies |
| 8.05_741.5529m/z | 741.553 | 8.05 | 3.92E-01 | 1.18 | short-day flies |
| 6.76_636.4599m/z | 636.460 | 6.76 | 3.93E-01 | 3.04 | short-day flies |
| 9.65_795.0967m/z | 795.097 | 9.65 | 3.93E-01 | 1.20 | long-day flies |
| 6.50_631.4807m/z | 631.481 | 6.50 | 3.93E-01 | 1.19 | long-day flies |
| 4.84_464.3081m/z | 464.308 | 4.84 | 3.94E-01 | 1.13 | long-day flies |
| 11.42_58.0669m/z | 58.067 | 11.42 | 3.96E-01 | 1.22 | short-day flies |
| 3.36_499.3017m/z | 499.302 | 3.36 | 3.96E-01 | 1.21 | short-day flies |
| 8.55_570.4464m/z | 570.446 | 8.55 | 3.96E-01 | 1.18 | long-day flies |
| 7.31_209.2269m/z | 209.227 | 7.31 | 3.96E-01 | 1.16 | short-day flies |
| 9.35_796.6513m/z | 796.651 | 9.35 | 3.97E-01 | 1.21 | short-day flies |
| 13.47_89.0598m/z | 89.060 | 13.47 | 3.97E-01 | 1.07 | long-day flies |
| 9.41_863.6894m/z | 863.689 | 9.41 | 3.98E-01 | 1.07 | short-day flies |
| 9.06_149.1330m/z | 149.133 | 9.06 | 3.98E-01 | 1.10 | long-day flies |
| 11.95_58.0670m/z | 58.067 | 11.95 | 3.98E-01 | 1.27 | long-day flies |
| 6.15_676.4920m/z | 676.492 | 6.15 | 3.99E-01 | 1.24 | short-day flies |
| 14.14_82.9907m/z | 82.991 | 14.14 | 3.99E-01 | 1.31 | long-day flies |
| 7.53_746.5789m/z | 746.579 | 7.53 | 3.99E-01 | 1.26 | short-day flies |
| 15.10_128.9548m/z | 128.955 | 15.10 | 4.00E-01 | 1.07 | long-day flies |
| 9.93_806.7604m/z | 806.760 | 9.93 | 4.00E-01 | 1.14 | long-day flies |
| 9.52_844.7391m/z | 844.739 | 9.52 | 4.01E-01 | 1.09 | long-day flies |
| 5.77_597.4891m/z | 597.489 | 5.77 | 4.02E-01 | 1.09 | long-day flies |
| 2.63_269.2102m/z | 269.210 | 2.63 | 4.04E-01 | 1.31 | short-day flies |
| 7.46_764.5231m/z | 764.523 | 7.46 | 4.05E-01 | 1.09 | long-day flies |
| 9.85_804.7196n | 822.753 | 9.85 | 4.05E-01 | 1.05 | long-day flies |
| 7.54_567.5005m/z | 567.500 | 7.54 | 4.08E-01 | 1.18 | short-day flies |
| 8.44_773.5946n | 774.602 | 8.44 | 4.09E-01 | 1.13 | short-day flies |
| 6.80_768.5148m/z | 768.515 | 6.80 | 4.09E-01 | 1.11 | short-day flies |
| 9.40_381.2984m/z | 381.298 | 9.40 | 4.10E-01 | 1.12 | long-day flies |
| 5.53_1150.7360m/z | 1150.736 | 5.53 | 4.11E-01 | 1.31 | short-day flies |
| 10.23_888.8422m/z | 888.842 | 10.23 | 4.11E-01 | 1.11 | long-day flies |
| 6.62_505.3881m/z | 505.388 | 6.62 | 4.11E-01 | 1.15 | long-day flies |
| 9.06_853.6836m/z | 853.684 | 9.06 | 4.15E-01 | 1.05 | short-day flies |
| 9.53_850.7206m/z | 850.721 | 9.53 | 4.20E-01 | 1.13 | long-day flies |
| 4.83_811.5024m/z | 811.502 | 4.83 | 4.21E-01 | 1.47 | short-day flies |
| 9.45_59.0619m/z | 59.062 | 9.45 | 4.21E-01 | 1.09 | long-day flies |
| 8.30_253.2887m/z | 253.289 | 8.30 | 4.25E-01 | 1.14 | long-day flies |
| 6.28_778.5395m/z | 778.539 | 6.28 | 4.25E-01 | 1.18 | short-day flies |
| 7.31_165.1647m/z | 165.165 | 7.31 | 4.27E-01 | 1.16 | short-day flies |
| 2.17_572.4375m/z | 572.437 | 2.17 | 4.27E-01 | 1.13 | long-day flies |
| 10.95_221.1182m/z | 221.118 | 10.95 | 4.27E-01 | 1.12 | long-day flies |
| 2.05_792.5708m/z | 792.571 | 2.05 | 4.28E-01 | 1.18 | short-day flies |
| 14.43_58.0672m/z | 58.067 | 14.43 | 4.28E-01 | 1.06 | long-day flies |
| 6.35_711.4951m/z | 711.495 | 6.35 | 4.30E-01 | 1.13 | long-day flies |
| 7.14_511.4361m/z | 511.436 | 7.14 | 4.31E-01 | 1.10 | long-day flies |
| 15.09_358.2359m/z | 358.236 | 15.09 | 4.31E-01 | 1.11 | short-day flies |
| 8.78_647.4578m/z | 647.458 | 8.78 | 4.31E-01 | 1.06 | short-day flies |
| 5.17_59.0618m/z | 59.062 | 5.17 | 4.33E-01 | 1.13 | long-day flies |
| 5.33_413.2668m/z | 413.267 | 5.33 | 4.33E-01 | 1.14 | long-day flies |
| 8.73_411.3476m/z | 411.348 | 8.73 | 4.34E-01 | 1.13 | long-day flies |
| 2.17_472.2911m/z | 472.291 | 2.17 | 4.35E-01 | 1.13 | short-day flies |
| 7.52_759.5762m/z | 759.576 | 7.52 | 4.35E-01 | 1.13 | short-day flies |
| 12.61_110.0971m/z | 110.097 | 12.61 | 4.35E-01 | 1.10 | long-day flies |
| 8.29_59.0620m/z | 59.062 | 8.29 | 4.36E-01 | 1.07 | long-day flies |
| 7.63_564.4759n | 582.510 | 7.63 | 4.36E-01 | 1.13 | long-day flies |
| 5.21_249.2589m/z | 249.259 | 5.21 | 4.36E-01 | 1.12 | short-day flies |
| 12.66_135.0815m/z | 135.081 | 12.66 | 4.37E-01 | 1.20 | long-day flies |
| 12.61_58.0665m/z | 58.066 | 12.61 | 4.38E-01 | 1.20 | short-day flies |
| 7.31_181.1959m/z | 181.196 | 7.31 | 4.39E-01 | 1.17 | short-day flies |
| 8.43_633.5052m/z | 633.505 | 8.43 | 4.39E-01 | 1.20 | long-day flies |
| 13.98_128.1099m/z | 128.110 | 13.98 | 4.40E-01 | 1.14 | short-day flies |
| 3.90_636.3001n | 637.307 | 3.90 | 4.40E-01 | 1.11 | short-day flies |
| 5.76_489.3117m/z | 489.312 | 5.76 | 4.40E-01 | 1.10 | long-day flies |
| 7.56_495.4408m/z | 495.441 | 7.56 | 4.40E-01 | 1.11 | short-day flies |
| 4.90_169.0876m/z | 169.088 | 4.90 | 4.40E-01 | 1.16 | long-day flies |
| 9.85_863.7824m/z | 863.782 | 9.85 | 4.41E-01 | 1.05 | long-day flies |
| 10.05_381.3505m/z | 381.350 | 10.05 | 4.43E-01 | 1.07 | short-day flies |
| 6.89_755.5460n | 756.553 | 6.89 | 4.43E-01 | 1.07 | short-day flies |
| 9.17_836.7391m/z | 836.739 | 9.17 | 4.43E-01 | 1.15 | short-day flies |
| 9.07_109.1019m/z | 109.102 | 9.07 | 4.44E-01 | 1.12 | long-day flies |
| 9.66_904.8076m/z | 904.808 | 9.66 | 4.45E-01 | 1.08 | long-day flies |
| 9.43_718.6717m/z | 718.672 | 9.43 | 4.46E-01 | 1.22 | short-day flies |
| 8.83_749.6416m/z | 749.642 | 8.83 | 4.46E-01 | 1.14 | long-day flies |
| 7.74_51.2401m/z | 51.240 | 7.74 | 4.46E-01 | 1.06 | long-day flies |
| 8.47_946.8089m/z | 946.809 | 8.47 | 4.46E-01 | 1.21 | short-day flies |
| 10.53_988.9305m/z | 988.930 | 10.53 | 4.48E-01 | 1.15 | short-day flies |
| 9.02_465.3936m/z | 465.394 | 9.02 | 4.48E-01 | 1.10 | long-day flies |
| 10.08_563.5360m/z | 563.536 | 10.08 | 4.48E-01 | 1.12 | long-day flies |
| 13.16_58.0666m/z | 58.067 | 13.16 | 4.50E-01 | 1.03 | long-day flies |
| 6.63_239.1786n | 257.212 | 6.63 | 4.50E-01 | 1.25 | long-day flies |
| 7.30_247.2435m/z | 247.243 | 7.30 | 4.50E-01 | 1.13 | short-day flies |
| 7.49_713.5596m/z | 713.560 | 7.49 | 4.54E-01 | 1.15 | long-day flies |
| 2.91_512.4159m/z | 512.416 | 2.91 | 4.56E-01 | 1.19 | long-day flies |
| 6.36_440.4095m/z | 440.409 | 6.36 | 4.56E-01 | 1.11 | short-day flies |
| 8.46_921.7949m/z | 921.795 | 8.46 | 4.56E-01 | 1.11 | short-day flies |
| 12.20_58.0664m/z | 58.066 | 12.20 | 4.56E-01 | 1.19 | long-day flies |
| 5.69_583.4935m/z | 583.494 | 5.69 | 4.57E-01 | 1.30 | short-day flies |
| 7.51_546.5209m/z | 546.521 | 7.51 | 4.60E-01 | 1.10 | long-day flies |
| 7.32_323.3316m/z | 323.332 | 7.32 | 4.62E-01 | 1.14 | short-day flies |
| 7.31_141.1284m/z | 141.128 | 7.31 | 4.63E-01 | 1.12 | short-day flies |
| 12.84_196.1701m/z | 196.170 | 12.84 | 4.63E-01 | 1.16 | short-day flies |
| 9.00_467.4087m/z | 467.409 | 9.00 | 4.63E-01 | 1.09 | long-day flies |
| 4.82_405.2458m/z | 405.246 | 4.82 | 4.64E-01 | 1.05 | long-day flies |
| 4.47_173.1328m/z | 173.133 | 4.47 | 4.64E-01 | 1.70 | long-day flies |
| 10.78_381.2980m/z | 381.298 | 10.78 | 4.65E-01 | 1.07 | long-day flies |
| 9.17_840.7102m/z | 840.710 | 9.17 | 4.65E-01 | 1.28 | long-day flies |
| 9.00_439.3779m/z | 439.378 | 9.00 | 4.66E-01 | 1.10 | long-day flies |
| 5.92_293.1772m/z | 293.177 | 5.92 | 4.66E-01 | 1.20 | long-day flies |
| 5.38_570.4153n | 588.448 | 5.38 | 4.66E-01 | 1.18 | short-day flies |
| 15.10_144.9277m/z | 144.928 | 15.10 | 4.66E-01 | 1.22 | long-day flies |
| 15.11_62.9825m/z | 62.983 | 15.11 | 4.69E-01 | 1.18 | long-day flies |
| 6.79_554.4411m/z | 554.441 | 6.79 | 4.69E-01 | 1.16 | long-day flies |
| 6.73_704.5222m/z | 704.522 | 6.73 | 4.69E-01 | 1.10 | short-day flies |
| 7.31_361.3835m/z | 361.384 | 7.31 | 4.70E-01 | 1.11 | short-day flies |
| 8.09_618.5232n | 636.557 | 8.09 | 4.70E-01 | 1.06 | short-day flies |
| 5.14_742.5248n | 765.514 | 5.14 | 4.70E-01 | 1.16 | short-day flies |
| 12.54_128.1105m/z | 128.111 | 12.54 | 4.71E-01 | 1.17 | long-day flies |
| 10.18_383.3666m/z | 383.367 | 10.18 | 4.72E-01 | 1.06 | long-day flies |
| 5.73_805.4962m/z | 805.496 | 5.73 | 4.73E-01 | 1.30 | short-day flies |
| 2.34_244.2646m/z | 244.265 | 2.34 | 4.73E-01 | 2.28 | long-day flies |
| 3.88_169.0878m/z | 169.088 | 3.88 | 4.73E-01 | 1.13 | short-day flies |
| 12.81_381.2982m/z | 381.298 | 12.81 | 4.75E-01 | 1.20 | long-day flies |
| 9.33_815.7009n | 816.708 | 9.33 | 4.75E-01 | 1.09 | long-day flies |
| 7.40_700.5302m/z | 700.530 | 7.40 | 4.76E-01 | 1.21 | long-day flies |
| 10.09_916.8351m/z | 916.835 | 10.09 | 4.78E-01 | 1.13 | long-day flies |
| 9.36_726.6613m/z | 726.661 | 9.36 | 4.78E-01 | 1.07 | long-day flies |
| 2.92_265.2532m/z | 265.253 | 2.92 | 4.78E-01 | 1.15 | short-day flies |
| 2.69_349.2961m/z | 349.296 | 2.69 | 4.78E-01 | 1.07 | short-day flies |
| 15.08_278.1110m/z | 278.111 | 15.08 | 4.79E-01 | 1.08 | long-day flies |
| 4.37_657.3938m/z | 657.394 | 4.37 | 4.80E-01 | 1.25 | short-day flies |
| 7.64_798.5867m/z | 798.587 | 7.64 | 4.81E-01 | 1.27 | long-day flies |
| 8.65_579.5349m/z | 579.535 | 8.65 | 4.81E-01 | 1.07 | long-day flies |
| 7.98_960.7105m/z | 960.711 | 7.98 | 4.82E-01 | 1.42 | short-day flies |
| 8.44_686.5937m/z | 686.594 | 8.44 | 4.83E-01 | 1.94 | short-day flies |
| 4.94_284.2954m/z | 284.295 | 4.94 | 4.83E-01 | 1.04 | long-day flies |
| 6.47_728.5231m/z | 728.523 | 6.47 | 4.84E-01 | 1.12 | short-day flies |
| 12.83_775.5543m/z | 775.554 | 12.83 | 4.85E-01 | 1.16 | short-day flies |
| 7.25_687.5441m/z | 687.544 | 7.25 | 4.85E-01 | 1.10 | long-day flies |
| 10.82_109.1015m/z | 109.102 | 10.82 | 4.86E-01 | 1.24 | long-day flies |
| 7.65_782.5679m/z | 782.568 | 7.65 | 4.86E-01 | 1.08 | short-day flies |
| 7.62_700.5282m/z | 700.528 | 7.62 | 4.88E-01 | 1.04 | long-day flies |
| 14.63_321.1327m/z | 321.133 | 14.63 | 4.89E-01 | 1.23 | long-day flies |
| 9.75_782.7240m/z | 782.724 | 9.75 | 4.91E-01 | 1.10 | short-day flies |
| 2.21_484.3849m/z | 484.385 | 2.21 | 4.92E-01 | 1.07 | long-day flies |
| 7.60_257.2133m/z | 257.213 | 7.60 | 4.93E-01 | 1.16 | long-day flies |
| 11.73_155.1072m/z | 155.107 | 11.73 | 4.93E-01 | 1.13 | long-day flies |
| 7.63_547.4726m/z | 547.473 | 7.63 | 4.93E-01 | 1.07 | long-day flies |
| 5.09_539.4790m/z | 539.479 | 5.09 | 4.93E-01 | 1.46 | short-day flies |
| 9.17_381.2984m/z | 381.298 | 9.17 | 4.93E-01 | 1.14 | short-day flies |
| 9.95_833.7700m/z | 833.770 | 9.95 | 4.94E-01 | 1.12 | long-day flies |
| 7.36_783.5774n | 784.585 | 7.36 | 4.94E-01 | 1.05 | short-day flies |
| 6.99_512.4644m/z | 512.464 | 6.99 | 4.95E-01 | 1.10 | long-day flies |
| 8.67_614.5721m/z | 614.572 | 8.67 | 4.96E-01 | 1.07 | long-day flies |
| 5.44_797.5360m/z | 797.536 | 5.44 | 4.97E-01 | 1.31 | short-day flies |
| 7.31_223.2416m/z | 223.242 | 7.31 | 4.98E-01 | 1.22 | short-day flies |
| 4.74_157.0503m/z | 157.050 | 4.74 | 4.99E-01 | 1.21 | short-day flies |
| 7.62_427.2496m/z | 427.250 | 7.62 | 4.99E-01 | 1.18 | short-day flies |
| 11.81_109.1004m/z | 109.100 | 11.81 | 5.00E-01 | 1.33 | long-day flies |
| 5.17_420.2691m/z | 420.269 | 5.17 | 5.00E-01 | 1.08 | short-day flies |
| 12.95_119.0869m/z | 119.087 | 12.95 | 5.00E-01 | 1.07 | long-day flies |
| 14.12_129.0554m/z | 129.055 | 14.12 | 5.00E-01 | 1.17 | short-day flies |
| 9.18_946.6739m/z | 946.674 | 9.18 | 5.01E-01 | 1.08 | long-day flies |
| 8.30_167.0713m/z | 167.071 | 8.30 | 5.01E-01 | 1.05 | long-day flies |
| 5.76_770.5564n | 771.564 | 5.76 | 5.01E-01 | 1.20 | short-day flies |
| 7.80_607.3875m/z | 607.388 | 7.80 | 5.02E-01 | 1.04 | short-day flies |
| 6.41_678.4493n | 696.484 | 6.41 | 5.03E-01 | 1.12 | short-day flies |
| 2.62_107.0713m/z | 107.071 | 2.62 | 5.04E-01 | 1.05 | short-day flies |
| 5.65_412.3797m/z | 412.380 | 5.65 | 5.04E-01 | 1.19 | short-day flies |
| 7.27_379.3942m/z | 379.394 | 7.27 | 5.06E-01 | 1.23 | short-day flies |
| 12.00_82.9906m/z | 82.991 | 12.00 | 5.06E-01 | 1.19 | short-day flies |
| 9.19_109.0657m/z | 109.066 | 9.19 | 5.06E-01 | 1.11 | long-day flies |
| 8.03_610.5417m/z | 610.542 | 8.03 | 5.08E-01 | 1.10 | long-day flies |
| 7.30_221.2272m/z | 221.227 | 7.30 | 5.10E-01 | 1.10 | short-day flies |
| 6.99_573.4870m/z | 573.487 | 6.99 | 5.10E-01 | 1.14 | long-day flies |
| 8.84_734.6310m/z | 734.631 | 8.84 | 5.10E-01 | 1.14 | long-day flies |
| 9.86_577.5178m/z | 577.518 | 9.86 | 5.11E-01 | 1.11 | short-day flies |
| 6.12_788.5424m/z | 788.542 | 6.12 | 5.12E-01 | 1.13 | short-day flies |
| 7.67_59.0619m/z | 59.062 | 7.67 | 5.12E-01 | 1.07 | long-day flies |
| 3.07_59.0619m/z | 59.062 | 3.07 | 5.13E-01 | 1.11 | short-day flies |
| 15.08_157.1710m/z | 157.171 | 15.08 | 5.13E-01 | 1.04 | long-day flies |
| 5.14_563.4674m/z | 563.467 | 5.14 | 5.13E-01 | 1.15 | short-day flies |
| 7.60_339.2925m/z | 339.292 | 7.60 | 5.13E-01 | 1.12 | long-day flies |
| 3.29_755.4704m/z | 755.470 | 3.29 | 5.13E-01 | 1.17 | short-day flies |
| 14.01_321.1337m/z | 321.134 | 14.01 | 5.13E-01 | 1.12 | long-day flies |
| 12.80_331.2849m/z | 331.285 | 12.80 | 5.14E-01 | 1.08 | long-day flies |
| 6.09_711.4954m/z | 711.495 | 6.09 | 5.16E-01 | 1.10 | long-day flies |
| 2.29_334.1798m/z | 334.180 | 2.29 | 5.16E-01 | 1.10 | short-day flies |
| 3.03_615.3473m/z | 615.347 | 3.03 | 5.17E-01 | 1.13 | short-day flies |
| 10.40_56.0509m/z | 56.051 | 10.40 | 5.18E-01 | 1.24 | short-day flies |
| 2.29_336.1785m/z | 336.179 | 2.29 | 5.18E-01 | 1.06 | long-day flies |
| 8.93_808.7053m/z | 808.705 | 8.93 | 5.20E-01 | 1.12 | short-day flies |
| 4.54_804.4934m/z | 804.493 | 4.54 | 5.22E-01 | 1.24 | short-day flies |
| 10.06_680.6325m/z | 680.633 | 10.06 | 5.22E-01 | 1.10 | short-day flies |
| 2.66_1039.6781m/z | 1039.678 | 2.66 | 5.24E-01 | 6.08 | long-day flies |
| 7.80_685.4363m/z | 685.436 | 7.80 | 5.25E-01 | 1.06 | long-day flies |
| 10.09_834.7912m/z | 834.791 | 10.09 | 5.26E-01 | 1.07 | long-day flies |
| 5.30_729.1418m/z | 729.142 | 5.30 | 5.27E-01 | 1.38 | short-day flies |
| 9.00_683.6053n | 684.613 | 9.00 | 5.27E-01 | 1.08 | long-day flies |
| 8.29_149.0604m/z | 149.060 | 8.29 | 5.27E-01 | 1.04 | long-day flies |
| 8.30_419.3518m/z | 419.352 | 8.30 | 5.27E-01 | 1.04 | long-day flies |
| 7.63_587.4652m/z | 587.465 | 7.63 | 5.27E-01 | 1.50 | long-day flies |
| 8.75_723.6255m/z | 723.626 | 8.75 | 5.28E-01 | 1.08 | long-day flies |
| 7.67_577.4434m/z | 577.443 | 7.67 | 5.29E-01 | 1.12 | long-day flies |
| 8.35_586.5412m/z | 586.541 | 8.35 | 5.29E-01 | 1.07 | long-day flies |
| 4.48_809.5354m/z | 809.535 | 4.48 | 5.30E-01 | 1.48 | short-day flies |
| 5.07_503.4073m/z | 503.407 | 5.07 | 5.30E-01 | 1.02 | short-day flies |
| 7.30_85.0660m/z | 85.066 | 7.30 | 5.31E-01 | 1.09 | short-day flies |
| 7.68_689.5589m/z | 689.559 | 7.68 | 5.31E-01 | 1.04 | long-day flies |
| 6.33_321.3154m/z | 321.315 | 6.33 | 5.32E-01 | 1.31 | short-day flies |
| 12.03_526.4320m/z | 526.432 | 12.03 | 5.33E-01 | 1.27 | long-day flies |
| 8.40_745.6169m/z | 745.617 | 8.40 | 5.34E-01 | 1.13 | short-day flies |
| 8.59_680.5817m/z | 680.582 | 8.59 | 5.34E-01 | 1.08 | long-day flies |
| 6.94_239.1509m/z | 239.151 | 6.94 | 5.36E-01 | 1.08 | long-day flies |
| 7.09_235.1311m/z | 235.131 | 7.09 | 5.36E-01 | 1.22 | long-day flies |
| 7.30_121.1149n | 139.149 | 7.30 | 5.37E-01 | 1.13 | short-day flies |
| 8.65_619.5271m/z | 619.527 | 8.65 | 5.37E-01 | 1.06 | long-day flies |
| 14.63_58.0677m/z | 58.068 | 14.63 | 5.37E-01 | 1.27 | long-day flies |
| 2.85_600.4688m/z | 600.469 | 2.85 | 5.37E-01 | 1.12 | short-day flies |
| 7.31_71.0501m/z | 71.050 | 7.31 | 5.39E-01 | 1.08 | short-day flies |
| 7.62_311.2590m/z | 311.259 | 7.62 | 5.40E-01 | 1.09 | long-day flies |
| 8.08_337.2745m/z | 337.274 | 8.08 | 5.40E-01 | 1.06 | short-day flies |
| 6.03_524.3315m/z | 524.331 | 6.03 | 5.40E-01 | 1.21 | short-day flies |
| 15.07_269.0012m/z | 269.001 | 15.07 | 5.41E-01 | 1.04 | long-day flies |
| 7.74_219.8852m/z | 219.885 | 7.74 | 5.41E-01 | 1.11 | short-day flies |
| 6.83_661.4684n | 662.476 | 6.83 | 5.43E-01 | 1.13 | short-day flies |
| 9.34_824.6905n | 842.724 | 9.34 | 5.43E-01 | 1.08 | long-day flies |
| 7.73_844.6553m/z | 844.655 | 7.73 | 5.45E-01 | 1.06 | short-day flies |
| 7.68_702.5441m/z | 702.544 | 7.68 | 5.45E-01 | 1.06 | long-day flies |
| 7.31_69.0707m/z | 69.071 | 7.31 | 5.45E-01 | 1.06 | short-day flies |
| 7.31_183.1764m/z | 183.176 | 7.31 | 5.46E-01 | 1.14 | short-day flies |
| 8.73_59.0620m/z | 59.062 | 8.73 | 5.46E-01 | 1.04 | long-day flies |
| 11.05_129.0559m/z | 129.056 | 11.05 | 5.46E-01 | 1.42 | long-day flies |
| 7.31_151.1490m/z | 151.149 | 7.31 | 5.47E-01 | 1.08 | short-day flies |
| 7.31_59.0618m/z | 59.062 | 7.31 | 5.47E-01 | 1.41 | long-day flies |
| 9.52_885.7682m/z | 885.768 | 9.52 | 5.47E-01 | 1.09 | long-day flies |
| 10.26_958.8822m/z | 958.882 | 10.26 | 5.47E-01 | 1.11 | long-day flies |
| 6.04_275.1659m/z | 275.166 | 6.04 | 5.47E-01 | 1.28 | long-day flies |
| 5.14_581.4786m/z | 581.479 | 5.14 | 5.48E-01 | 1.13 | short-day flies |
| 9.54_870.7560m/z | 870.756 | 9.54 | 5.49E-01 | 1.06 | long-day flies |
| 6.69_147.0663m/z | 147.066 | 6.69 | 5.50E-01 | 1.59 | long-day flies |
| 7.31_503.3864m/z | 503.386 | 7.31 | 5.50E-01 | 1.08 | short-day flies |
| 7.69_786.6010m/z | 786.601 | 7.69 | 5.51E-01 | 1.05 | short-day flies |
| 7.97_422.3997m/z | 422.400 | 7.97 | 5.52E-01 | 1.12 | short-day flies |
| 5.83_219.1756m/z | 219.176 | 5.83 | 5.52E-01 | 1.17 | long-day flies |
| 7.87_561.4534m/z | 561.453 | 7.87 | 5.52E-01 | 1.05 | long-day flies |
| 7.47_107.0497m/z | 107.050 | 7.47 | 5.53E-01 | 1.06 | long-day flies |
| 7.60_521.4565m/z | 521.457 | 7.60 | 5.53E-01 | 1.08 | long-day flies |
| 8.30_475.4142m/z | 475.414 | 8.30 | 5.55E-01 | 1.04 | long-day flies |
| 6.82_521.4552m/z | 521.455 | 6.82 | 5.55E-01 | 1.14 | short-day flies |
| 9.07_742.5978m/z | 742.598 | 9.07 | 5.56E-01 | 1.06 | short-day flies |
| 7.80_85.5846m/z | 85.585 | 7.80 | 5.57E-01 | 1.20 | short-day flies |
| 8.94_607.5659m/z | 607.566 | 8.94 | 5.57E-01 | 1.08 | long-day flies |
| 7.10_59.0617m/z | 59.062 | 7.10 | 5.58E-01 | 1.14 | short-day flies |
| 8.29_589.5305m/z | 589.531 | 8.29 | 5.59E-01 | 1.05 | long-day flies |
| 3.88_667.9469m/z | 667.947 | 3.88 | 5.61E-01 | 1.26 | short-day flies |
| 8.94_647.5664m/z | 647.566 | 8.94 | 5.62E-01 | 1.08 | long-day flies |
| 11.76_58.0665m/z | 58.066 | 11.76 | 5.63E-01 | 1.12 | short-day flies |
| 7.31_107.0995n | 125.133 | 7.31 | 5.64E-01 | 1.10 | short-day flies |
| 10.23_918.8503m/z | 918.850 | 10.23 | 5.65E-01 | 1.07 | long-day flies |
| 8.82_708.6140m/z | 708.614 | 8.82 | 5.66E-01 | 1.08 | long-day flies |
| 10.11_395.3664m/z | 395.366 | 10.11 | 5.68E-01 | 1.11 | long-day flies |
| 7.56_621.5226m/z | 621.523 | 7.56 | 5.68E-01 | 1.28 | long-day flies |
| 9.37_778.6915m/z | 778.692 | 9.37 | 5.69E-01 | 1.05 | long-day flies |
| 8.01_754.5753m/z | 754.575 | 8.01 | 5.69E-01 | 1.03 | short-day flies |
| 6.04_333.3520m/z | 333.352 | 6.04 | 5.73E-01 | 1.18 | short-day flies |
| 12.13_89.0607m/z | 89.061 | 12.13 | 5.73E-01 | 1.10 | long-day flies |
| 7.31_137.1333m/z | 137.133 | 7.31 | 5.74E-01 | 1.09 | short-day flies |
| 11.37_58.0668m/z | 58.067 | 11.37 | 5.74E-01 | 1.07 | long-day flies |
| 8.23_341.3054m/z | 341.305 | 8.23 | 5.74E-01 | 1.06 | long-day flies |
| 8.01_566.4913n | 584.525 | 8.01 | 5.74E-01 | 1.08 | long-day flies |
| 15.17_224.1299m/z | 224.130 | 15.17 | 5.75E-01 | 1.05 | short-day flies |
| 15.08_178.1328m/z | 178.133 | 15.08 | 5.76E-01 | 1.09 | short-day flies |
| 15.24_128.9536m/z | 128.954 | 15.24 | 5.77E-01 | 1.27 | long-day flies |
| 10.39_986.9143m/z | 986.914 | 10.39 | 5.78E-01 | 1.15 | long-day flies |
| 13.01_184.1714m/z | 184.171 | 13.01 | 5.79E-01 | 1.13 | long-day flies |
| 7.30_345.3515m/z | 345.352 | 7.30 | 5.79E-01 | 1.26 | short-day flies |
| 9.71_871.7645n | 872.772 | 9.71 | 5.80E-01 | 1.05 | long-day flies |
| 7.93_546.5239m/z | 546.524 | 7.93 | 5.81E-01 | 1.09 | long-day flies |
| 2.97_570.8208m/z | 570.821 | 2.97 | 5.81E-01 | 1.08 | short-day flies |
| 13.52_82.9908m/z | 82.991 | 13.52 | 5.83E-01 | 1.07 | long-day flies |
| 2.20_331.2178m/z | 331.218 | 2.20 | 5.83E-01 | 1.95 | long-day flies |
| 3.95_702.9475m/z | 702.947 | 3.95 | 5.84E-01 | 1.21 | short-day flies |
| 7.68_711.5409m/z | 711.541 | 7.68 | 5.84E-01 | 1.05 | short-day flies |
| 4.81_444.2123m/z | 444.212 | 4.81 | 5.84E-01 | 1.14 | long-day flies |
| 7.17_702.5074m/z | 702.507 | 7.17 | 5.85E-01 | 1.10 | long-day flies |
| 7.30_305.3212m/z | 305.321 | 7.30 | 5.86E-01 | 1.04 | short-day flies |
| 3.64_59.0613m/z | 59.061 | 3.64 | 5.86E-01 | 1.16 | short-day flies |
| 7.72_740.5201m/z | 740.520 | 7.72 | 5.86E-01 | 1.06 | long-day flies |
| 14.90_58.0668m/z | 58.067 | 14.90 | 5.86E-01 | 1.02 | short-day flies |
| 6.78_788.5893m/z | 788.589 | 6.78 | 5.87E-01 | 1.05 | short-day flies |
| 8.02_762.6013m/z | 762.601 | 8.02 | 5.87E-01 | 1.05 | short-day flies |
| 5.21_137.1333m/z | 137.133 | 5.21 | 5.88E-01 | 1.00 | long-day flies |
| 4.50_265.2536m/z | 265.254 | 4.50 | 5.88E-01 | 1.12 | short-day flies |
| 9.15_750.6622m/z | 750.662 | 9.15 | 5.89E-01 | 1.05 | long-day flies |
| 5.33_97.1018m/z | 97.102 | 5.33 | 5.89E-01 | 1.08 | short-day flies |
| 9.12_698.6300m/z | 698.630 | 9.12 | 5.89E-01 | 1.04 | long-day flies |
| 3.49_272.2598m/z | 272.260 | 3.49 | 5.89E-01 | 2.46 | long-day flies |
| 7.31_235.2428m/z | 235.243 | 7.31 | 5.89E-01 | 1.02 | short-day flies |
| 7.31_309.3161m/z | 309.316 | 7.31 | 5.91E-01 | 1.05 | short-day flies |
| 13.30_331.2851m/z | 331.285 | 13.30 | 5.91E-01 | 1.06 | short-day flies |
| 2.08_748.5444m/z | 748.544 | 2.08 | 5.91E-01 | 1.13 | short-day flies |
| 7.61_784.5874m/z | 784.587 | 7.61 | 5.92E-01 | 1.04 | short-day flies |
| 10.02_855.7346m/z | 855.735 | 10.02 | 5.92E-01 | 1.06 | long-day flies |
| 3.28_184.0746m/z | 184.075 | 3.28 | 5.93E-01 | 1.60 | long-day flies |
| 7.30_167.1802m/z | 167.180 | 7.30 | 5.93E-01 | 1.04 | short-day flies |
| 6.38_746.5112n | 747.518 | 6.38 | 5.93E-01 | 1.27 | long-day flies |
| 7.31_387.3984m/z | 387.398 | 7.31 | 5.94E-01 | 1.08 | short-day flies |
| 3.50_254.2487m/z | 254.249 | 3.50 | 5.94E-01 | 2.20 | long-day flies |
| 7.31_79.0681n | 97.102 | 7.31 | 5.94E-01 | 1.05 | short-day flies |
| 2.18_528.4095m/z | 528.410 | 2.18 | 5.95E-01 | 1.07 | long-day flies |
| 5.73_109.1021m/z | 109.102 | 5.73 | 5.95E-01 | 1.08 | long-day flies |
| 7.31_83.0865m/z | 83.087 | 7.31 | 5.95E-01 | 1.06 | short-day flies |
| 2.83_438.3442m/z | 438.344 | 2.83 | 5.96E-01 | 1.32 | long-day flies |
| 10.58_551.5066m/z | 551.507 | 10.58 | 5.96E-01 | 1.17 | short-day flies |
| 7.31_405.4089m/z | 405.409 | 7.31 | 5.97E-01 | 1.08 | short-day flies |
| 8.34_466.4621m/z | 466.462 | 8.34 | 5.98E-01 | 1.06 | short-day flies |
| 2.53_762.5577m/z | 762.558 | 2.53 | 5.99E-01 | 1.14 | short-day flies |
| 7.24_520.5035m/z | 520.503 | 7.24 | 6.00E-01 | 1.13 | long-day flies |
| 7.31_67.0681n | 109.102 | 7.31 | 6.01E-01 | 1.07 | short-day flies |
| 7.66_818.6400m/z | 818.640 | 7.66 | 6.02E-01 | 1.04 | short-day flies |
| 5.56_407.3455m/z | 407.346 | 5.56 | 6.02E-01 | 1.12 | short-day flies |
| 15.09_175.0273m/z | 175.027 | 15.09 | 6.02E-01 | 1.09 | short-day flies |
| 5.90_320.3087n | 338.342 | 5.90 | 6.03E-01 | 1.04 | long-day flies |
| 2.76_400.3062m/z | 400.306 | 2.76 | 6.03E-01 | 1.45 | long-day flies |
| 9.10_787.6700n | 788.677 | 9.10 | 6.03E-01 | 1.10 | long-day flies |
| 6.99_713.4996n | 714.507 | 6.99 | 6.04E-01 | 1.06 | long-day flies |
| 9.14_724.6461m/z | 724.646 | 9.14 | 6.04E-01 | 1.04 | long-day flies |
| 7.55_768.5908m/z | 768.591 | 7.55 | 6.05E-01 | 1.05 | short-day flies |
| 5.21_97.1021m/z | 97.102 | 5.21 | 6.06E-01 | 1.02 | short-day flies |
| 7.30_53.0526n | 95.086 | 7.30 | 6.07E-01 | 1.08 | short-day flies |
| 7.31_464.4230n | 465.430 | 7.31 | 6.08E-01 | 1.06 | short-day flies |
| 10.40_960.8935m/z | 960.893 | 10.40 | 6.10E-01 | 1.08 | long-day flies |
| 2.76_478.2939m/z | 478.294 | 2.76 | 6.10E-01 | 1.96 | long-day flies |
| 9.36_752.6769m/z | 752.677 | 9.36 | 6.11E-01 | 1.04 | long-day flies |
| 8.30_530.4702n | 548.504 | 8.30 | 6.12E-01 | 1.03 | long-day flies |
| 2.49_444.3324m/z | 444.332 | 2.49 | 6.14E-01 | 1.40 | short-day flies |
| 4.69_535.3432m/z | 535.343 | 4.69 | 6.14E-01 | 1.25 | short-day flies |
| 9.87_900.8039m/z | 900.804 | 9.87 | 6.16E-01 | 1.07 | short-day flies |
| 2.06_219.1740m/z | 219.174 | 2.06 | 6.17E-01 | 1.18 | short-day flies |
| 2.32_342.2649m/z | 342.265 | 2.32 | 6.19E-01 | 1.09 | short-day flies |
| 9.96_295.2321m/z | 295.232 | 9.96 | 6.20E-01 | 1.08 | long-day flies |
| 8.11_745.5629n | 746.570 | 8.11 | 6.22E-01 | 1.04 | short-day flies |
| 15.08_75.0928m/z | 75.093 | 15.08 | 6.23E-01 | 1.06 | short-day flies |
| 11.45_89.0606m/z | 89.061 | 11.45 | 6.23E-01 | 1.23 | long-day flies |
| 12.85_58.0657m/z | 58.066 | 12.85 | 6.23E-01 | 1.04 | short-day flies |
| 4.90_456.4038m/z | 456.404 | 4.90 | 6.24E-01 | 1.05 | long-day flies |
| 2.34_149.0243m/z | 149.024 | 2.34 | 6.25E-01 | 1.15 | short-day flies |
| 3.39_959.6145m/z | 959.614 | 3.39 | 6.25E-01 | 2.72 | long-day flies |
| 2.52_586.4532m/z | 586.453 | 2.52 | 6.26E-01 | 1.06 | long-day flies |
| 7.30_277.2895m/z | 277.289 | 7.30 | 6.27E-01 | 1.03 | short-day flies |
| 9.45_876.7776m/z | 876.778 | 9.45 | 6.28E-01 | 1.15 | long-day flies |
| 7.76_802.6122m/z | 802.612 | 7.76 | 6.28E-01 | 1.10 | short-day flies |
| 12.75_129.0551m/z | 129.055 | 12.75 | 6.28E-01 | 1.03 | long-day flies |
| 5.91_344.3507m/z | 344.351 | 5.91 | 6.28E-01 | 1.09 | long-day flies |
| 9.77_764.6777m/z | 764.678 | 9.77 | 6.29E-01 | 1.06 | long-day flies |
| 5.91_675.6767m/z | 675.677 | 5.91 | 6.30E-01 | 1.10 | long-day flies |
| 7.31_291.3057m/z | 291.306 | 7.31 | 6.30E-01 | 1.02 | short-day flies |
| 15.07_190.0132m/z | 190.013 | 15.07 | 6.30E-01 | 1.06 | long-day flies |
| 7.03_744.5554m/z | 744.555 | 7.03 | 6.31E-01 | 1.09 | long-day flies |
| 8.04_788.6170m/z | 788.617 | 8.04 | 6.31E-01 | 1.04 | short-day flies |
| 2.40_576.4110m/z | 576.411 | 2.40 | 6.32E-01 | 1.66 | short-day flies |
| 11.71_128.1079m/z | 128.108 | 11.71 | 6.32E-01 | 1.06 | long-day flies |
| 10.23_836.8051m/z | 836.805 | 10.23 | 6.32E-01 | 1.08 | long-day flies |
| 9.15_816.7021m/z | 816.702 | 9.15 | 6.33E-01 | 1.06 | long-day flies |
| 8.95_642.6035m/z | 642.603 | 8.95 | 6.35E-01 | 1.08 | long-day flies |
| 6.89_814.6082m/z | 814.608 | 6.89 | 6.35E-01 | 1.04 | short-day flies |
| 8.93_696.6150m/z | 696.615 | 8.93 | 6.35E-01 | 1.03 | long-day flies |
| 6.78_729.5301n | 730.537 | 6.78 | 6.37E-01 | 1.04 | short-day flies |
| 10.24_696.6656m/z | 696.666 | 10.24 | 6.37E-01 | 1.06 | long-day flies |
| 4.16_256.2642m/z | 256.264 | 4.16 | 6.38E-01 | 1.05 | short-day flies |
| 7.30_951.8381m/z | 951.838 | 7.30 | 6.38E-01 | 1.11 | long-day flies |
| 5.46_710.4351m/z | 710.435 | 5.46 | 6.38E-01 | 1.14 | short-day flies |
| 7.30_179.1800m/z | 179.180 | 7.30 | 6.40E-01 | 1.03 | short-day flies |
| 7.31_447.4196m/z | 447.420 | 7.31 | 6.40E-01 | 1.01 | short-day flies |
| 7.85_766.5398m/z | 766.540 | 7.85 | 6.40E-01 | 1.12 | long-day flies |
| 14.98_437.1943m/z | 437.194 | 14.98 | 6.41E-01 | 1.04 | long-day flies |
| 6.98_718.5387m/z | 718.539 | 6.98 | 6.43E-01 | 1.12 | long-day flies |
| 7.09_716.5155m/z | 716.515 | 7.09 | 6.44E-01 | 1.10 | short-day flies |
| 9.95_125.1335m/z | 125.133 | 9.95 | 6.44E-01 | 1.05 | short-day flies |
| 14.89_82.9915m/z | 82.992 | 14.89 | 6.44E-01 | 1.26 | long-day flies |
| 15.10_144.9854m/z | 144.985 | 15.10 | 6.44E-01 | 1.02 | short-day flies |
| 3.54_89.0615m/z | 89.061 | 3.54 | 6.45E-01 | 2.69 | short-day flies |
| 9.04_757.6454m/z | 757.645 | 9.04 | 6.47E-01 | 1.06 | long-day flies |
| 5.21_309.2787m/z | 309.279 | 5.21 | 6.47E-01 | 1.03 | short-day flies |
| 9.40_921.7472m/z | 921.747 | 9.40 | 6.48E-01 | 1.04 | long-day flies |
| 7.73_784.5825m/z | 784.583 | 7.73 | 6.50E-01 | 1.09 | short-day flies |
| 3.40_933.5981m/z | 933.598 | 3.40 | 6.50E-01 | 1.01 | short-day flies |
| 14.95_723.5149m/z | 723.515 | 14.95 | 6.51E-01 | 1.04 | long-day flies |
| 15.09_226.9906m/z | 226.991 | 15.09 | 6.51E-01 | 1.05 | long-day flies |
| 4.89_109.0653m/z | 109.065 | 4.89 | 6.51E-01 | 1.11 | short-day flies |
| 9.79_100.0771m/z | 100.077 | 9.79 | 6.51E-01 | 1.08 | long-day flies |
| 7.00_840.6243m/z | 840.624 | 7.00 | 6.51E-01 | 1.04 | short-day flies |
| 4.33_304.2620m/z | 304.262 | 4.33 | 6.53E-01 | 1.25 | long-day flies |
| 2.66_519.3331n | 520.340 | 2.66 | 6.54E-01 | 1.86 | long-day flies |
| 8.39_664.6027m/z | 664.603 | 8.39 | 6.55E-01 | 1.06 | long-day flies |
| 8.52_628.3767m/z | 628.377 | 8.52 | 6.56E-01 | 1.17 | long-day flies |
| 6.86_675.5074m/z | 675.507 | 6.86 | 6.56E-01 | 1.08 | short-day flies |
| 7.47_492.4418m/z | 492.442 | 7.47 | 6.58E-01 | 1.07 | long-day flies |
| 8.81_467.4074m/z | 467.407 | 8.81 | 6.60E-01 | 1.11 | short-day flies |
| 2.78_500.2748m/z | 500.275 | 2.78 | 6.61E-01 | 1.57 | long-day flies |
| 7.31_112.1261n | 135.118 | 7.31 | 6.61E-01 | 1.05 | short-day flies |
| 7.73_577.5179m/z | 577.518 | 7.73 | 6.61E-01 | 1.02 | short-day flies |
| 7.31_249.2570m/z | 249.257 | 7.31 | 6.63E-01 | 1.03 | short-day flies |
| 5.97_127.1487m/z | 127.149 | 5.97 | 6.63E-01 | 1.29 | long-day flies |
| 7.08_285.2435m/z | 285.244 | 7.08 | 6.64E-01 | 1.04 | long-day flies |
| 9.74_934.8461m/z | 934.846 | 9.74 | 6.65E-01 | 1.00 | long-day flies |
| 9.07_197.0820m/z | 197.082 | 9.07 | 6.65E-01 | 1.03 | long-day flies |
| 6.09_745.5056m/z | 745.506 | 6.09 | 6.67E-01 | 1.10 | short-day flies |
| 7.31_135.1304n | 177.164 | 7.31 | 6.69E-01 | 1.07 | short-day flies |
| 2.08_358.2346m/z | 358.235 | 2.08 | 6.69E-01 | 1.04 | short-day flies |
| 7.26_644.4904m/z | 644.490 | 7.26 | 6.71E-01 | 1.08 | long-day flies |
| 9.59_100.0766m/z | 100.077 | 9.59 | 6.72E-01 | 1.13 | short-day flies |
| 8.09_720.5647m/z | 720.565 | 8.09 | 6.72E-01 | 1.37 | short-day flies |
| 7.22_731.5453n | 732.553 | 7.22 | 6.73E-01 | 1.03 | short-day flies |
| 5.56_734.4497m/z | 734.450 | 5.56 | 6.75E-01 | 1.20 | short-day flies |
| 5.91_360.3243m/z | 360.324 | 5.91 | 6.75E-01 | 1.05 | long-day flies |
| 11.09_257.2494m/z | 257.249 | 11.09 | 6.76E-01 | 1.04 | long-day flies |
| 2.46_674.5061m/z | 674.506 | 2.46 | 6.76E-01 | 1.05 | long-day flies |
| 14.33_331.2849m/z | 331.285 | 14.33 | 6.76E-01 | 1.04 | short-day flies |
| 8.75_465.3937m/z | 465.394 | 8.75 | 6.77E-01 | 1.06 | long-day flies |
| 3.62_428.3365m/z | 428.336 | 3.62 | 6.78E-01 | 2.13 | long-day flies |
| 3.80_517.3847m/z | 517.385 | 3.80 | 6.78E-01 | 1.05 | short-day flies |
| 6.38_736.4920m/z | 736.492 | 6.38 | 6.80E-01 | 1.06 | short-day flies |
| 12.36_58.0661m/z | 58.066 | 12.36 | 6.81E-01 | 1.05 | long-day flies |
| 9.44_836.7472m/z | 836.747 | 9.44 | 6.82E-01 | 1.14 | long-day flies |
| 4.85_413.3225m/z | 413.322 | 4.85 | 6.84E-01 | 1.15 | short-day flies |
| 7.31_81.0709m/z | 81.071 | 7.31 | 6.84E-01 | 1.05 | short-day flies |
| 12.49_82.9907m/z | 82.991 | 12.49 | 6.84E-01 | 1.01 | long-day flies |
| 7.44_800.5958m/z | 800.596 | 7.44 | 6.85E-01 | 1.10 | long-day flies |
| 5.20_95.0863m/z | 95.086 | 5.20 | 6.85E-01 | 1.19 | short-day flies |
| 5.96_441.2985m/z | 441.299 | 5.96 | 6.85E-01 | 1.26 | long-day flies |
| 7.56_730.5382m/z | 730.538 | 7.56 | 6.89E-01 | 1.07 | short-day flies |
| 12.44_58.0664m/z | 58.066 | 12.44 | 6.89E-01 | 1.24 | long-day flies |
| 8.14_381.2983m/z | 381.298 | 8.14 | 6.90E-01 | 1.06 | long-day flies |
| 9.93_509.4964m/z | 509.496 | 9.93 | 6.91E-01 | 1.03 | long-day flies |
| 12.00_128.1089m/z | 128.109 | 12.00 | 6.91E-01 | 1.11 | short-day flies |
| 16.92_59.0621m/z | 59.062 | 16.92 | 6.91E-01 | 1.27 | long-day flies |
| 8.63_109.0661m/z | 109.066 | 8.63 | 6.92E-01 | 1.20 | long-day flies |
| 15.07_297.9914m/z | 297.991 | 15.07 | 6.92E-01 | 2.60 | short-day flies |
| 5.08_385.3819m/z | 385.382 | 5.08 | 6.92E-01 | 1.38 | long-day flies |
| 7.32_191.1800m/z | 191.180 | 7.32 | 6.93E-01 | 1.07 | short-day flies |
| 7.31_81.0811n | 123.118 | 7.31 | 6.93E-01 | 1.05 | short-day flies |
| 15.08_284.9934m/z | 284.993 | 15.08 | 6.94E-01 | 1.16 | long-day flies |
| 11.75_129.0548m/z | 129.055 | 11.75 | 6.96E-01 | 1.05 | short-day flies |
| 8.73_714.6265m/z | 714.627 | 8.73 | 6.96E-01 | 1.53 | long-day flies |
| 3.28_521.3489n | 522.356 | 3.28 | 6.98E-01 | 1.65 | long-day flies |
| 6.88_698.4982m/z | 698.498 | 6.88 | 6.99E-01 | 1.12 | short-day flies |
| 10.24_397.3830m/z | 397.383 | 10.24 | 7.00E-01 | 1.03 | long-day flies |
| 8.67_705.5922n | 706.600 | 8.67 | 7.00E-01 | 1.03 | short-day flies |
| 15.08_120.9871m/z | 120.987 | 15.08 | 7.00E-01 | 1.03 | short-day flies |
| 15.08_135.0030m/z | 135.003 | 15.08 | 7.00E-01 | 1.02 | short-day flies |
| 13.45_133.0877m/z | 133.088 | 13.45 | 7.00E-01 | 1.08 | short-day flies |
| 3.09_363.3113m/z | 363.311 | 3.09 | 7.02E-01 | 1.04 | short-day flies |
| 3.38_479.3019n | 480.309 | 3.38 | 7.02E-01 | 1.63 | long-day flies |
| 7.30_111.1175m/z | 111.118 | 7.30 | 7.03E-01 | 1.05 | short-day flies |
| 8.34_731.5824n | 732.590 | 8.34 | 7.04E-01 | 1.05 | long-day flies |
| 7.30_207.2115m/z | 207.211 | 7.30 | 7.04E-01 | 1.14 | long-day flies |
| 2.34_167.0351m/z | 167.035 | 2.34 | 7.04E-01 | 1.25 | short-day flies |
| 13.32_110.0973m/z | 110.097 | 13.32 | 7.04E-01 | 1.06 | long-day flies |
| 7.30_275.2738m/z | 275.274 | 7.30 | 7.05E-01 | 1.03 | short-day flies |
| 8.30_574.5598m/z | 574.560 | 8.30 | 7.06E-01 | 1.11 | short-day flies |
| 8.67_169.0863m/z | 169.086 | 8.67 | 7.08E-01 | 1.06 | long-day flies |
| 3.91_295.1925m/z | 295.193 | 3.91 | 7.08E-01 | 1.16 | long-day flies |
| 5.08_463.4142m/z | 463.414 | 5.08 | 7.09E-01 | 1.38 | long-day flies |
| 10.35_946.8829m/z | 946.883 | 10.35 | 7.09E-01 | 1.04 | long-day flies |
| 7.98_523.4725m/z | 523.472 | 7.98 | 7.10E-01 | 1.09 | long-day flies |
| 5.89_823.6053m/z | 823.605 | 5.89 | 7.10E-01 | 1.07 | short-day flies |
| 9.60_790.6918m/z | 790.692 | 9.60 | 7.10E-01 | 1.18 | long-day flies |
| 2.10_704.5174m/z | 704.517 | 2.10 | 7.10E-01 | 1.11 | short-day flies |
| 7.37_842.6401m/z | 842.640 | 7.37 | 7.10E-01 | 1.02 | short-day flies |
| 10.49_948.8978m/z | 948.898 | 10.49 | 7.10E-01 | 1.04 | long-day flies |
| 7.53_704.5235m/z | 704.523 | 7.53 | 7.12E-01 | 1.05 | short-day flies |
| 15.08_191.0023n | 233.056 | 15.08 | 7.12E-01 | 1.09 | long-day flies |
| 4.81_406.2531m/z | 406.253 | 4.81 | 7.13E-01 | 1.03 | long-day flies |
| 3.20_169.0865m/z | 169.087 | 3.20 | 7.14E-01 | 1.17 | short-day flies |
| 5.33_149.0242m/z | 149.024 | 5.33 | 7.14E-01 | 1.03 | long-day flies |
| 6.44_601.5190m/z | 601.519 | 6.44 | 7.19E-01 | 1.05 | long-day flies |
| 10.31_1053.8895m/z | 1053.889 | 10.31 | 7.19E-01 | 1.06 | long-day flies |
| 6.41_737.5080m/z | 737.508 | 6.41 | 7.19E-01 | 1.03 | short-day flies |
| 7.67_571.4807n | 572.488 | 7.67 | 7.22E-01 | 1.03 | long-day flies |
| 3.30_496.3419m/z | 496.342 | 3.30 | 7.22E-01 | 1.03 | short-day flies |
| 3.38_339.2903m/z | 339.290 | 3.38 | 7.22E-01 | 1.54 | long-day flies |
| 2.38_806.5866m/z | 806.587 | 2.38 | 7.24E-01 | 1.07 | long-day flies |
| 8.10_221.1190m/z | 221.119 | 8.10 | 7.24E-01 | 1.10 | long-day flies |
| 9.85_823.1351m/z | 823.135 | 9.85 | 7.24E-01 | 1.06 | short-day flies |
| 8.01_549.4881m/z | 549.488 | 8.01 | 7.26E-01 | 1.06 | long-day flies |
| 6.70_287.2226m/z | 287.223 | 6.70 | 7.26E-01 | 2.13 | long-day flies |
| 14.35_685.4364m/z | 685.436 | 14.35 | 7.26E-01 | 1.03 | long-day flies |
| 3.10_496.3414m/z | 496.341 | 3.10 | 7.28E-01 | 2.04 | long-day flies |
| 5.20_368.2921n | 391.284 | 5.20 | 7.28E-01 | 1.02 | long-day flies |
| 2.45_718.5324m/z | 718.532 | 2.45 | 7.28E-01 | 1.08 | short-day flies |
| 8.46_919.7870n | 920.794 | 8.46 | 7.29E-01 | 1.00 | short-day flies |
| 6.28_549.4874m/z | 549.487 | 6.28 | 7.30E-01 | 1.04 | short-day flies |
| 3.78_441.3224m/z | 441.322 | 3.78 | 7.31E-01 | 1.07 | short-day flies |
| 5.33_227.2011m/z | 227.201 | 5.33 | 7.31E-01 | 1.11 | short-day flies |
| 2.21_372.3116m/z | 372.312 | 2.21 | 7.31E-01 | 1.01 | short-day flies |
| 3.56_171.1397m/z | 171.140 | 3.56 | 7.32E-01 | 1.95 | long-day flies |
| 12.09_227.1981m/z | 227.198 | 12.09 | 7.34E-01 | 1.07 | short-day flies |
| 6.64_283.2261m/z | 283.226 | 6.64 | 7.35E-01 | 1.04 | long-day flies |
| 4.29_453.3197m/z | 453.320 | 4.29 | 7.36E-01 | 1.14 | short-day flies |
| 8.30_205.1235m/z | 205.124 | 8.30 | 7.36E-01 | 1.03 | long-day flies |
| 7.30_359.3649m/z | 359.365 | 7.30 | 7.38E-01 | 1.12 | long-day flies |
| 7.20_770.5660m/z | 770.566 | 7.20 | 7.38E-01 | 1.08 | long-day flies |
| 4.00_428.3743m/z | 428.374 | 4.00 | 7.38E-01 | 1.13 | long-day flies |
| 8.13_605.5253m/z | 605.525 | 8.13 | 7.39E-01 | 1.05 | short-day flies |
| 5.69_473.2701m/z | 473.270 | 5.69 | 7.40E-01 | 1.02 | long-day flies |
| 2.46_488.3600m/z | 488.360 | 2.46 | 7.40E-01 | 1.71 | short-day flies |
| 7.32_758.5686m/z | 758.569 | 7.32 | 7.41E-01 | 1.02 | short-day flies |
| 10.13_930.8507m/z | 930.851 | 10.13 | 7.42E-01 | 1.06 | long-day flies |
| 4.80_109.0665m/z | 109.066 | 4.80 | 7.43E-01 | 1.01 | short-day flies |
| 8.30_569.4441m/z | 569.444 | 8.30 | 7.44E-01 | 1.03 | long-day flies |
| 10.43_934.8822m/z | 934.882 | 10.43 | 7.45E-01 | 1.02 | short-day flies |
| 6.69_129.0553m/z | 129.055 | 6.69 | 7.48E-01 | 1.77 | long-day flies |
| 10.14_764.7194m/z | 764.719 | 10.14 | 7.48E-01 | 1.02 | short-day flies |
| 7.66_760.5844m/z | 760.584 | 7.66 | 7.48E-01 | 1.02 | short-day flies |
| 10.29_790.7759n | 808.806 | 10.29 | 7.49E-01 | 1.15 | short-day flies |
| 9.77_860.7718m/z | 860.772 | 9.77 | 7.50E-01 | 1.02 | long-day flies |
| 2.08_337.2737m/z | 337.274 | 2.08 | 7.50E-01 | 3.80 | long-day flies |
| 3.78_381.3003m/z | 381.300 | 3.78 | 7.51E-01 | 1.05 | short-day flies |
| 2.40_398.3271m/z | 398.327 | 2.40 | 7.52E-01 | 1.02 | short-day flies |
| 6.93_710.4732m/z | 710.473 | 6.93 | 7.53E-01 | 1.06 | long-day flies |
| 8.39_769.5874m/z | 769.587 | 8.39 | 7.53E-01 | 1.11 | short-day flies |
| 2.41_987.6473m/z | 987.647 | 2.41 | 7.54E-01 | 10.97 | long-day flies |
| 12.92_96.0808m/z | 96.081 | 12.92 | 7.55E-01 | 1.07 | short-day flies |
| 10.35_972.8999m/z | 972.900 | 10.35 | 7.56E-01 | 1.10 | long-day flies |
| 8.40_603.5335m/z | 603.533 | 8.40 | 7.57E-01 | 1.01 | short-day flies |
| 9.41_804.7098m/z | 804.710 | 9.41 | 7.58E-01 | 1.01 | long-day flies |
| 7.29_311.2567m/z | 311.257 | 7.29 | 7.61E-01 | 1.08 | long-day flies |
| 10.38_890.8537m/z | 890.854 | 10.38 | 7.61E-01 | 1.04 | short-day flies |
| 8.01_313.2743m/z | 313.274 | 8.01 | 7.61E-01 | 1.03 | long-day flies |
| 2.41_493.3175n | 494.325 | 2.41 | 7.63E-01 | 1.52 | long-day flies |
| 6.34_340.3468m/z | 340.347 | 6.34 | 7.64E-01 | 1.17 | short-day flies |
| 2.98_59.0609m/z | 59.061 | 2.98 | 7.64E-01 | 1.12 | short-day flies |
| 5.33_353.3425m/z | 353.342 | 5.33 | 7.66E-01 | 1.00 | long-day flies |
| 6.96_468.4408m/z | 468.441 | 6.96 | 7.66E-01 | 1.03 | short-day flies |
| 9.18_776.6787m/z | 776.679 | 9.18 | 7.66E-01 | 1.01 | short-day flies |
| 8.07_717.5905m/z | 717.590 | 8.07 | 7.66E-01 | 1.02 | short-day flies |
| 12.24_89.0615m/z | 89.062 | 12.24 | 7.67E-01 | 1.01 | short-day flies |
| 5.15_327.2494m/z | 327.249 | 5.15 | 7.68E-01 | 1.04 | short-day flies |
| 8.76_664.5639n | 682.598 | 8.76 | 7.68E-01 | 1.03 | long-day flies |
| 10.03_928.8363m/z | 928.836 | 10.03 | 7.69E-01 | 1.01 | short-day flies |
| 9.94_379.3367m/z | 379.337 | 9.94 | 7.70E-01 | 1.02 | short-day flies |
| 6.44_851.6352m/z | 851.635 | 6.44 | 7.70E-01 | 1.09 | short-day flies |
| 7.40_116.9722m/z | 116.972 | 7.40 | 7.71E-01 | 1.02 | short-day flies |
| 7.03_696.5409m/z | 696.541 | 7.03 | 7.71E-01 | 1.02 | long-day flies |
| 6.68_269.2117m/z | 269.212 | 6.68 | 7.73E-01 | 1.46 | long-day flies |
| 3.56_464.3589m/z | 464.359 | 3.56 | 7.74E-01 | 1.96 | long-day flies |
| 9.41_197.0821m/z | 197.082 | 9.41 | 7.75E-01 | 1.02 | short-day flies |
| 8.01_311.2591m/z | 311.259 | 8.01 | 7.75E-01 | 1.04 | long-day flies |
| 9.57_780.7075m/z | 780.707 | 9.57 | 7.75E-01 | 1.01 | long-day flies |
| 8.72_638.5480n | 656.582 | 8.72 | 7.77E-01 | 1.04 | short-day flies |
| 5.33_317.3211m/z | 317.321 | 5.33 | 7.77E-01 | 1.12 | short-day flies |
| 9.80_713.5681m/z | 713.568 | 9.80 | 7.78E-01 | 1.02 | long-day flies |
| 6.52_257.2126m/z | 257.213 | 6.52 | 7.78E-01 | 1.03 | short-day flies |
| 7.31_169.1600m/z | 169.160 | 7.31 | 7.78E-01 | 1.02 | short-day flies |
| 7.15_493.4248m/z | 493.425 | 7.15 | 7.79E-01 | 1.01 | long-day flies |
| 6.41_466.4244m/z | 466.424 | 6.41 | 7.82E-01 | 1.00 | short-day flies |
| 10.17_852.8019m/z | 852.802 | 10.17 | 7.83E-01 | 1.04 | long-day flies |
| 4.94_379.3194m/z | 379.319 | 4.94 | 7.83E-01 | 1.03 | short-day flies |
| 6.89_368.3899m/z | 368.390 | 6.89 | 7.83E-01 | 1.02 | short-day flies |
| 6.26_421.2415m/z | 421.241 | 6.26 | 7.84E-01 | 1.07 | short-day flies |
| 6.53_479.3702m/z | 479.370 | 6.53 | 7.84E-01 | 1.07 | short-day flies |
| 7.05_391.3917m/z | 391.392 | 7.05 | 7.84E-01 | 1.05 | short-day flies |
| 8.25_381.2995m/z | 381.300 | 8.25 | 7.84E-01 | 1.02 | long-day flies |
| 6.70_577.5190m/z | 577.519 | 6.70 | 7.85E-01 | 1.22 | short-day flies |
| 7.22_790.6072m/z | 790.607 | 7.22 | 7.85E-01 | 1.02 | short-day flies |
| 2.41_476.3008m/z | 476.301 | 2.41 | 7.86E-01 | 1.52 | long-day flies |
| 7.32_751.6214m/z | 751.621 | 7.32 | 7.86E-01 | 1.02 | long-day flies |
| 8.71_948.8282m/z | 948.828 | 8.71 | 7.88E-01 | 1.02 | short-day flies |
| 3.90_695.3599m/z | 695.360 | 3.90 | 7.88E-01 | 1.05 | long-day flies |
| 9.93_836.7701m/z | 836.770 | 9.93 | 7.88E-01 | 1.04 | short-day flies |
| 6.79_1117.7829m/z | 1117.783 | 6.79 | 7.89E-01 | 1.09 | short-day flies |
| 2.28_379.3062m/z | 379.306 | 2.28 | 7.89E-01 | 1.03 | long-day flies |
| 7.09_136.8271m/z | 136.827 | 7.09 | 7.90E-01 | 1.04 | short-day flies |
| 7.09_740.5223m/z | 740.522 | 7.09 | 7.90E-01 | 1.02 | long-day flies |
| 12.17_128.1084m/z | 128.108 | 12.17 | 7.90E-01 | 1.04 | long-day flies |
| 10.09_537.5254m/z | 537.525 | 10.09 | 7.91E-01 | 1.04 | long-day flies |
| 4.58_111.0461m/z | 111.046 | 4.58 | 7.91E-01 | 1.02 | short-day flies |
| 2.76_955.5832m/z | 955.583 | 2.76 | 7.94E-01 | 5.06 | long-day flies |
| 5.34_357.3011m/z | 357.301 | 5.34 | 7.96E-01 | 1.03 | long-day flies |
| 7.72_608.5256m/z | 608.526 | 7.72 | 7.96E-01 | 1.11 | long-day flies |
| 10.16_877.8108n | 878.818 | 10.16 | 7.97E-01 | 1.04 | long-day flies |
| 9.40_880.7204m/z | 880.720 | 9.40 | 7.97E-01 | 1.02 | long-day flies |
| 8.40_757.5982n | 758.605 | 8.40 | 7.97E-01 | 1.06 | long-day flies |
| 7.63_734.5708m/z | 734.571 | 7.63 | 7.97E-01 | 1.02 | long-day flies |
| 9.47_547.4698m/z | 547.470 | 9.47 | 7.97E-01 | 1.03 | short-day flies |
| 9.35_822.6786m/z | 822.679 | 9.35 | 7.97E-01 | 1.02 | short-day flies |
| 2.78_109.0675m/z | 109.067 | 2.78 | 8.00E-01 | 1.06 | short-day flies |
| 5.38_629.4739m/z | 629.474 | 5.38 | 8.02E-01 | 1.06 | short-day flies |
| 7.77_766.5363m/z | 766.536 | 7.77 | 8.04E-01 | 1.01 | long-day flies |
| 9.65_864.7770m/z | 864.777 | 9.65 | 8.04E-01 | 1.04 | long-day flies |
| 5.84_934.6441m/z | 934.644 | 5.84 | 8.06E-01 | 1.01 | short-day flies |
| 10.91_96.0824m/z | 96.082 | 10.91 | 8.08E-01 | 1.05 | short-day flies |
| 7.30_261.2581m/z | 261.258 | 7.30 | 8.09E-01 | 1.09 | long-day flies |
| 6.15_433.3309m/z | 433.331 | 6.15 | 8.11E-01 | 1.41 | short-day flies |
| 9.93_780.7434m/z | 780.743 | 9.93 | 8.11E-01 | 1.02 | long-day flies |
| 10.44_908.8670m/z | 908.867 | 10.44 | 8.11E-01 | 1.07 | long-day flies |
| 8.76_494.4925m/z | 494.492 | 8.76 | 8.11E-01 | 1.04 | long-day flies |
| 9.58_806.7237m/z | 806.724 | 9.58 | 8.13E-01 | 1.00 | long-day flies |
| 2.38_620.4367m/z | 620.437 | 2.38 | 8.13E-01 | 1.74 | short-day flies |
| 6.75_738.5074m/z | 738.507 | 6.75 | 8.13E-01 | 1.01 | short-day flies |
| 10.09_864.8017m/z | 864.802 | 10.09 | 8.14E-01 | 1.04 | short-day flies |
| 4.94_97.1018m/z | 97.102 | 4.94 | 8.15E-01 | 1.02 | long-day flies |
| 3.43_265.2537m/z | 265.254 | 3.43 | 8.15E-01 | 1.03 | short-day flies |
| 2.92_478.2938m/z | 478.294 | 2.92 | 8.15E-01 | 1.05 | long-day flies |
| 7.40_719.5342m/z | 719.534 | 7.40 | 8.15E-01 | 1.14 | long-day flies |
| 6.83_612.4859m/z | 612.486 | 6.83 | 8.16E-01 | 1.04 | long-day flies |
| 5.68_803.6006m/z | 803.601 | 5.68 | 8.17E-01 | 1.64 | short-day flies |
| 2.53_383.2793m/z | 383.279 | 2.53 | 8.17E-01 | 1.02 | short-day flies |
| 7.16_283.2276m/z | 283.228 | 7.16 | 8.17E-01 | 1.04 | long-day flies |
| 2.65_424.3426m/z | 424.343 | 2.65 | 8.20E-01 | 1.04 | long-day flies |
| 2.51_311.2591m/z | 311.259 | 2.51 | 8.20E-01 | 1.33 | long-day flies |
| 2.50_474.2597m/z | 474.260 | 2.50 | 8.20E-01 | 1.22 | long-day flies |
| 15.07_163.9993m/z | 163.999 | 15.07 | 8.20E-01 | 1.16 | long-day flies |
| 7.69_766.5477n | 808.584 | 7.69 | 8.22E-01 | 1.02 | long-day flies |
| 2.25_476.2786m/z | 476.279 | 2.25 | 8.22E-01 | 3.03 | long-day flies |
| 7.31_698.5105m/z | 698.511 | 7.31 | 8.23E-01 | 1.12 | long-day flies |
| 11.17_96.0818m/z | 96.082 | 11.17 | 8.24E-01 | 1.58 | long-day flies |
| 10.27_932.8654m/z | 932.865 | 10.27 | 8.24E-01 | 1.04 | long-day flies |
| 4.96_521.2968m/z | 521.297 | 4.96 | 8.24E-01 | 1.04 | long-day flies |
| 3.12_288.1762m/z | 288.176 | 3.12 | 8.24E-01 | 1.01 | short-day flies |
| 3.43_532.2784m/z | 532.278 | 3.43 | 8.25E-01 | 1.07 | short-day flies |
| 9.80_107.0496m/z | 107.050 | 9.80 | 8.26E-01 | 1.01 | long-day flies |
| 5.97_275.1656m/z | 275.166 | 5.97 | 8.28E-01 | 1.18 | long-day flies |
| 7.94_702.5436m/z | 702.544 | 7.94 | 8.28E-01 | 1.01 | long-day flies |
| 7.31_549.4869m/z | 549.487 | 7.31 | 8.28E-01 | 1.00 | short-day flies |
| 4.94_111.1182m/z | 111.118 | 4.94 | 8.28E-01 | 1.06 | short-day flies |
| 8.72_439.3779m/z | 439.378 | 8.72 | 8.28E-01 | 1.04 | short-day flies |
| 3.69_298.3469m/z | 298.347 | 3.69 | 8.30E-01 | 14.07 | short-day flies |
| 3.22_526.4248m/z | 526.425 | 3.22 | 8.33E-01 | 1.01 | short-day flies |
| 10.58_331.2864m/z | 331.286 | 10.58 | 8.33E-01 | 1.06 | long-day flies |
| 3.57_89.0609m/z | 89.061 | 3.57 | 8.33E-01 | 1.02 | long-day flies |
| 3.92_353.3422m/z | 353.342 | 3.92 | 8.35E-01 | 1.09 | long-day flies |
| 8.65_744.5874m/z | 744.587 | 8.65 | 8.35E-01 | 1.02 | long-day flies |
| 12.80_135.0819m/z | 135.082 | 12.80 | 8.37E-01 | 1.08 | short-day flies |
| 5.85_420.2748m/z | 420.275 | 5.85 | 8.37E-01 | 1.04 | long-day flies |
| 2.61_436.3393n | 454.374 | 2.61 | 8.39E-01 | 1.02 | short-day flies |
| 8.16_755.5853n | 756.593 | 8.16 | 8.39E-01 | 1.06 | long-day flies |
| 9.94_810.7551m/z | 810.755 | 9.94 | 8.41E-01 | 1.09 | long-day flies |
| 6.28_702.5081m/z | 702.508 | 6.28 | 8.42E-01 | 1.22 | long-day flies |
| 4.83_578.0320m/z | 578.032 | 4.83 | 8.42E-01 | 1.15 | short-day flies |
| 2.51_452.2777m/z | 452.278 | 2.51 | 8.42E-01 | 1.33 | long-day flies |
| 7.30_195.2112m/z | 195.211 | 7.30 | 8.42E-01 | 1.04 | short-day flies |
| 2.48_630.4798m/z | 630.480 | 2.48 | 8.42E-01 | 1.04 | long-day flies |
| 7.37_116.9678m/z | 116.968 | 7.37 | 8.42E-01 | 1.40 | long-day flies |
| 2.51_903.5511m/z | 903.551 | 2.51 | 8.43E-01 | 2.68 | long-day flies |
| 12.26_133.0870m/z | 133.087 | 12.26 | 8.43E-01 | 1.10 | short-day flies |
| 7.08_467.4093m/z | 467.409 | 7.08 | 8.45E-01 | 1.02 | short-day flies |
| 6.50_447.4172m/z | 447.417 | 6.50 | 8.46E-01 | 1.01 | short-day flies |
| 12.64_123.1159m/z | 123.116 | 12.64 | 8.49E-01 | 1.03 | short-day flies |
| 7.83_750.5389m/z | 750.539 | 7.83 | 8.49E-01 | 1.07 | long-day flies |
| 6.57_901.5137m/z | 901.514 | 6.57 | 8.49E-01 | 1.19 | short-day flies |
| 3.97_351.3261m/z | 351.326 | 3.97 | 8.51E-01 | 1.03 | short-day flies |
| 9.35_932.7007m/z | 932.701 | 9.35 | 8.52E-01 | 1.12 | long-day flies |
| 9.54_824.6862m/z | 824.686 | 9.54 | 8.54E-01 | 1.00 | short-day flies |
| 9.09_169.0872m/z | 169.087 | 9.09 | 8.55E-01 | 1.09 | short-day flies |
| 8.84_494.4925m/z | 494.493 | 8.84 | 8.58E-01 | 1.04 | short-day flies |
| 4.93_634.7505m/z | 634.751 | 4.93 | 8.58E-01 | 1.17 | short-day flies |
| 6.96_123.0807m/z | 123.081 | 6.96 | 8.58E-01 | 1.03 | short-day flies |
| 14.33_133.0868m/z | 133.087 | 14.33 | 8.60E-01 | 1.04 | long-day flies |
| 10.01_858.7672n | 876.801 | 10.01 | 8.60E-01 | 1.02 | long-day flies |
| 7.08_676.4910m/z | 676.491 | 7.08 | 8.61E-01 | 1.14 | long-day flies |
| 10.15_904.8341m/z | 904.834 | 10.15 | 8.61E-01 | 1.00 | short-day flies |
| 12.38_97.0660m/z | 97.066 | 12.38 | 8.62E-01 | 1.09 | long-day flies |
| 12.53_58.0666m/z | 58.067 | 12.53 | 8.62E-01 | 1.04 | long-day flies |
| 7.73_718.5378m/z | 718.538 | 7.73 | 8.62E-01 | 1.02 | long-day flies |
| 7.31_690.5064m/z | 690.506 | 7.31 | 8.62E-01 | 1.00 | long-day flies |
| 7.25_285.2433m/z | 285.243 | 7.25 | 8.64E-01 | 1.02 | short-day flies |
| 9.96_142.1239m/z | 142.124 | 9.96 | 8.64E-01 | 1.48 | long-day flies |
| 5.07_284.2959m/z | 284.296 | 5.07 | 8.64E-01 | 1.00 | short-day flies |
| 2.90_556.4436m/z | 556.444 | 2.90 | 8.65E-01 | 1.05 | long-day flies |
| 2.43_532.3836m/z | 532.384 | 2.43 | 8.66E-01 | 1.14 | short-day flies |
| 3.26_426.3584m/z | 426.358 | 3.26 | 8.66E-01 | 1.08 | long-day flies |
| 2.66_184.0747m/z | 184.075 | 2.66 | 8.66E-01 | 2.49 | long-day flies |
| 6.39_484.4358m/z | 484.436 | 6.39 | 8.66E-01 | 1.07 | short-day flies |
| 2.33_304.3011m/z | 304.301 | 2.33 | 8.67E-01 | 12.34 | short-day flies |
| 10.01_917.8318m/z | 917.832 | 10.01 | 8.69E-01 | 1.02 | long-day flies |
| 8.69_100.0766m/z | 100.077 | 8.69 | 8.69E-01 | 1.11 | long-day flies |
| 9.96_309.2573m/z | 309.257 | 9.96 | 8.70E-01 | 1.03 | long-day flies |
| 6.36_702.5082m/z | 702.508 | 6.36 | 8.70E-01 | 1.06 | short-day flies |
| 4.36_539.2828m/z | 539.283 | 4.36 | 8.72E-01 | 1.34 | short-day flies |
| 3.55_617.3574m/z | 617.357 | 3.55 | 8.73E-01 | 1.05 | short-day flies |
| 7.80_760.5867m/z | 760.587 | 7.80 | 8.73E-01 | 1.61 | long-day flies |
| 2.26_98.9780m/z | 98.978 | 2.26 | 8.73E-01 | 1.02 | short-day flies |
| 2.98_468.3896m/z | 468.390 | 2.98 | 8.73E-01 | 1.01 | long-day flies |
| 3.56_480.3090m/z | 480.309 | 3.56 | 8.74E-01 | 1.01 | short-day flies |
| 5.21_716.4067m/z | 716.407 | 5.21 | 8.74E-01 | 1.09 | long-day flies |
| 8.85_775.6558m/z | 775.656 | 8.85 | 8.76E-01 | 1.03 | long-day flies |
| 5.93_97.0654m/z | 97.065 | 5.93 | 8.77E-01 | 1.14 | long-day flies |
| 10.49_974.9139m/z | 974.914 | 10.49 | 8.77E-01 | 1.07 | short-day flies |
| 12.30_124.1134m/z | 124.113 | 12.30 | 8.78E-01 | 1.03 | short-day flies |
| 3.62_284.3320m/z | 284.332 | 3.62 | 8.79E-01 | 30.47 | long-day flies |
| 10.36_920.8676m/z | 920.868 | 10.36 | 8.80E-01 | 1.07 | short-day flies |
| 14.94_685.4365m/z | 685.436 | 14.94 | 8.80E-01 | 1.01 | long-day flies |
| 7.57_285.2436m/z | 285.244 | 7.57 | 8.81E-01 | 1.03 | short-day flies |
| 2.22_468.3108m/z | 468.311 | 2.22 | 8.81E-01 | 1.41 | long-day flies |
| 9.93_253.1963m/z | 253.196 | 9.93 | 8.81E-01 | 1.02 | short-day flies |
| 10.01_849.7778n | 850.785 | 10.01 | 8.81E-01 | 1.02 | long-day flies |
| 4.58_267.2694m/z | 267.269 | 4.58 | 8.82E-01 | 1.19 | long-day flies |
| 4.06_270.2777m/z | 270.278 | 4.06 | 8.83E-01 | 1.69 | short-day flies |
| 4.18_422.2481m/z | 422.248 | 4.18 | 8.85E-01 | 1.10 | short-day flies |
| 5.21_151.1491m/z | 151.149 | 5.21 | 8.85E-01 | 1.07 | long-day flies |
| 5.08_481.4266m/z | 481.427 | 5.08 | 8.86E-01 | 1.16 | long-day flies |
| 2.58_641.4124m/z | 641.412 | 2.58 | 8.87E-01 | 1.14 | short-day flies |
| 15.07_183.0246m/z | 183.025 | 15.07 | 8.87E-01 | 1.03 | short-day flies |
| 4.33_264.2462n | 282.280 | 4.33 | 8.88E-01 | 1.00 | short-day flies |
| 5.33_335.3313m/z | 335.331 | 5.33 | 8.89E-01 | 1.02 | long-day flies |
| 10.50_1014.9528m/z | 1014.953 | 10.50 | 8.89E-01 | 1.00 | short-day flies |
| 10.09_837.7829n | 860.811 | 10.09 | 8.90E-01 | 1.02 | short-day flies |
| 8.40_529.4619m/z | 529.462 | 8.40 | 8.90E-01 | 1.05 | long-day flies |
| 8.36_756.5915m/z | 756.592 | 8.36 | 8.91E-01 | 1.01 | short-day flies |
| 8.92_782.6959m/z | 782.696 | 8.92 | 8.91E-01 | 1.00 | long-day flies |
| 6.34_860.5440n | 861.551 | 6.34 | 8.92E-01 | 1.08 | long-day flies |
| 7.83_691.5712m/z | 691.571 | 7.83 | 8.92E-01 | 1.07 | long-day flies |
| 9.62_381.2982m/z | 381.298 | 9.62 | 8.92E-01 | 1.01 | long-day flies |
| 9.58_832.7405m/z | 832.740 | 9.58 | 8.94E-01 | 1.04 | short-day flies |
| 10.36_257.2474m/z | 257.247 | 10.36 | 8.96E-01 | 1.13 | long-day flies |
| 5.22_81.0713m/z | 81.071 | 5.22 | 8.96E-01 | 1.08 | long-day flies |
| 6.58_427.3776m/z | 427.378 | 6.58 | 8.96E-01 | 2.03 | long-day flies |
| 2.58_498.4009m/z | 498.401 | 2.58 | 8.96E-01 | 1.02 | short-day flies |
| 12.42_82.9899m/z | 82.990 | 12.42 | 8.96E-01 | 1.01 | long-day flies |
| 6.16_462.4188m/z | 462.419 | 6.16 | 8.97E-01 | 1.28 | short-day flies |
| 8.07_729.5676n | 730.575 | 8.07 | 8.98E-01 | 1.02 | long-day flies |
| 6.69_426.3712n | 427.378 | 6.69 | 9.01E-01 | 1.88 | long-day flies |
| 6.38_575.5031m/z | 575.503 | 6.38 | 9.02E-01 | 1.01 | short-day flies |
| 8.04_810.6047m/z | 810.605 | 8.04 | 9.03E-01 | 1.02 | long-day flies |
| 2.74_503.3255m/z | 503.326 | 2.74 | 9.04E-01 | 1.00 | long-day flies |
| 2.24_440.3589m/z | 440.359 | 2.24 | 9.05E-01 | 1.01 | short-day flies |
| 10.06_397.3835m/z | 397.384 | 10.06 | 9.06E-01 | 1.01 | short-day flies |
| 8.72_697.6087m/z | 697.609 | 8.72 | 9.07E-01 | 1.02 | short-day flies |
| 7.08_484.4132n | 502.447 | 7.08 | 9.07E-01 | 1.01 | short-day flies |
| 10.02_577.5180m/z | 577.518 | 10.02 | 9.07E-01 | 1.01 | short-day flies |
| 7.27_780.5522m/z | 780.552 | 7.27 | 9.08E-01 | 1.00 | short-day flies |
| 6.07_573.4878m/z | 573.488 | 6.07 | 9.08E-01 | 1.06 | short-day flies |
| 6.94_410.3999m/z | 410.400 | 6.94 | 9.08E-01 | 1.02 | short-day flies |
| 7.30_139.1126m/z | 139.113 | 7.30 | 9.09E-01 | 1.07 | long-day flies |
| 7.69_529.4533m/z | 529.453 | 7.69 | 9.09E-01 | 1.06 | long-day flies |
| 2.44_532.2804m/z | 532.280 | 2.44 | 9.11E-01 | 1.18 | long-day flies |
| 2.41_184.0742m/z | 184.074 | 2.41 | 9.11E-01 | 1.54 | long-day flies |
| 7.12_770.5691m/z | 770.569 | 7.12 | 9.12E-01 | 1.07 | short-day flies |
| 8.91_760.6451m/z | 760.645 | 8.91 | 9.13E-01 | 1.07 | long-day flies |
| 5.20_109.1019m/z | 109.102 | 5.20 | 9.13E-01 | 1.09 | long-day flies |
| 13.50_331.2854m/z | 331.285 | 13.50 | 9.14E-01 | 1.00 | long-day flies |
| 7.67_383.3158m/z | 383.316 | 7.67 | 9.14E-01 | 1.01 | long-day flies |
| 6.63_465.3953m/z | 465.395 | 6.63 | 9.15E-01 | 1.02 | short-day flies |
| 3.78_481.3142m/z | 481.314 | 3.78 | 9.15E-01 | 1.11 | short-day flies |
| 8.77_381.2991m/z | 381.299 | 8.77 | 9.15E-01 | 1.02 | short-day flies |
| 5.09_403.3932m/z | 403.393 | 5.09 | 9.16E-01 | 1.10 | long-day flies |
| 6.43_790.5610m/z | 790.561 | 6.43 | 9.18E-01 | 1.14 | short-day flies |
| 7.26_816.6239m/z | 816.624 | 7.26 | 9.18E-01 | 1.05 | long-day flies |
| 9.28_547.4700m/z | 547.470 | 9.28 | 9.19E-01 | 1.01 | short-day flies |
| 5.22_672.4237m/z | 672.424 | 5.22 | 9.19E-01 | 1.09 | short-day flies |
| 7.18_221.1205m/z | 221.121 | 7.18 | 9.19E-01 | 1.26 | long-day flies |
| 10.08_694.6503m/z | 694.650 | 10.08 | 9.20E-01 | 1.13 | short-day flies |
| 5.84_975.6710m/z | 975.671 | 5.84 | 9.20E-01 | 1.00 | long-day flies |
| 5.98_573.4867m/z | 573.487 | 5.98 | 9.21E-01 | 1.12 | short-day flies |
| 6.13_599.5033m/z | 599.503 | 6.13 | 9.21E-01 | 1.08 | short-day flies |
| 9.57_754.6926m/z | 754.693 | 9.57 | 9.22E-01 | 1.00 | long-day flies |
| 9.96_901.8094m/z | 901.809 | 9.96 | 9.23E-01 | 1.41 | short-day flies |
| 8.44_576.5703m/z | 576.570 | 8.44 | 9.23E-01 | 1.03 | short-day flies |
| 5.31_375.3239m/z | 375.324 | 5.31 | 9.23E-01 | 1.13 | short-day flies |
| 9.76_834.7549m/z | 834.755 | 9.76 | 9.24E-01 | 1.03 | short-day flies |
| 3.22_600.4669m/z | 600.467 | 3.22 | 9.24E-01 | 1.32 | long-day flies |
| 2.66_467.3490m/z | 467.349 | 2.66 | 9.24E-01 | 1.05 | short-day flies |
| 5.77_312.3258m/z | 312.326 | 5.77 | 9.25E-01 | 1.09 | short-day flies |
| 9.41_830.7241m/z | 830.724 | 9.41 | 9.26E-01 | 1.09 | short-day flies |
| 8.25_962.7287m/z | 962.729 | 8.25 | 9.26E-01 | 1.07 | long-day flies |
| 2.86_377.2897m/z | 377.290 | 2.86 | 9.27E-01 | 1.34 | long-day flies |
| 4.50_810.0397m/z | 810.040 | 4.50 | 9.27E-01 | 1.19 | short-day flies |
| 5.21_123.1179m/z | 123.118 | 5.21 | 9.28E-01 | 1.13 | long-day flies |
| 7.13_311.2588m/z | 311.259 | 7.13 | 9.28E-01 | 1.01 | short-day flies |
| 8.94_856.6792m/z | 856.679 | 8.94 | 9.29E-01 | 1.16 | long-day flies |
| 2.54_244.2284m/z | 244.228 | 2.54 | 9.30E-01 | 1.78 | long-day flies |
| 10.09_808.7751m/z | 808.775 | 10.09 | 9.30E-01 | 1.01 | short-day flies |
| 6.38_769.5026m/z | 769.503 | 6.38 | 9.30E-01 | 1.11 | short-day flies |
| 4.92_97.0662m/z | 97.066 | 4.92 | 9.31E-01 | 1.01 | long-day flies |
| 10.30_880.8335m/z | 880.833 | 10.30 | 9.31E-01 | 1.03 | long-day flies |
| 11.94_82.9903m/z | 82.990 | 11.94 | 9.31E-01 | 1.01 | long-day flies |
| 6.56_366.3729m/z | 366.373 | 6.56 | 9.32E-01 | 1.03 | long-day flies |
| 7.97_934.6813m/z | 934.681 | 7.97 | 9.32E-01 | 1.01 | long-day flies |
| 7.61_770.6051m/z | 770.605 | 7.61 | 9.32E-01 | 1.01 | long-day flies |
| 6.34_760.5171m/z | 760.517 | 6.34 | 9.36E-01 | 1.18 | long-day flies |
| 7.40_716.5229m/z | 716.523 | 7.40 | 9.36E-01 | 1.02 | long-day flies |
| 5.94_337.3104m/z | 337.310 | 5.94 | 9.37E-01 | 1.09 | long-day flies |
| 9.65_550.4918m/z | 550.492 | 9.65 | 9.37E-01 | 1.04 | short-day flies |
| 9.93_862.7868m/z | 862.787 | 9.93 | 9.38E-01 | 1.01 | short-day flies |
| 10.09_890.8190m/z | 890.819 | 10.09 | 9.39E-01 | 1.02 | short-day flies |
| 8.76_685.6099m/z | 685.610 | 8.76 | 9.39E-01 | 1.01 | long-day flies |
| 6.88_688.4908m/z | 688.491 | 6.88 | 9.42E-01 | 1.04 | long-day flies |
| 9.16_810.7264m/z | 810.726 | 9.16 | 9.43E-01 | 1.30 | long-day flies |
| 6.72_257.2126m/z | 257.213 | 6.72 | 9.43E-01 | 1.02 | long-day flies |
| 7.40_575.5022m/z | 575.502 | 7.40 | 9.43E-01 | 1.03 | long-day flies |
| 5.33_391.2856m/z | 391.286 | 5.33 | 9.44E-01 | 1.04 | short-day flies |
| 7.30_331.3368m/z | 331.337 | 7.30 | 9.45E-01 | 1.14 | long-day flies |
| 7.77_744.5550m/z | 744.555 | 7.77 | 9.45E-01 | 1.00 | short-day flies |
| 7.64_726.5602m/z | 726.560 | 7.64 | 9.46E-01 | 1.04 | long-day flies |
| 6.34_601.5189m/z | 601.519 | 6.34 | 9.46E-01 | 1.05 | short-day flies |
| 7.69_728.5632m/z | 728.563 | 7.69 | 9.46E-01 | 1.05 | short-day flies |
| 14.86_142.1238m/z | 142.124 | 14.86 | 9.46E-01 | 1.00 | long-day flies |
| 14.46_127.1241m/z | 127.124 | 14.46 | 9.46E-01 | 1.02 | short-day flies |
| 7.30_193.1960m/z | 193.196 | 7.30 | 9.47E-01 | 1.00 | short-day flies |
| 7.84_708.5107m/z | 708.511 | 7.84 | 9.48E-01 | 1.01 | long-day flies |
| 5.97_456.3833m/z | 456.383 | 5.97 | 9.48E-01 | 1.00 | short-day flies |
| 7.80_662.4454n | 663.453 | 7.80 | 9.49E-01 | 1.00 | short-day flies |
| 9.52_798.6637m/z | 798.664 | 9.52 | 9.49E-01 | 1.02 | short-day flies |
| 8.86_670.5985m/z | 670.598 | 8.86 | 9.51E-01 | 1.07 | short-day flies |
| 9.87_550.4949m/z | 550.495 | 9.87 | 9.51E-01 | 1.00 | long-day flies |
| 8.68_597.5454m/z | 597.545 | 8.68 | 9.51E-01 | 1.02 | short-day flies |
| 8.37_311.2579m/z | 311.258 | 8.37 | 9.52E-01 | 1.01 | short-day flies |
| 12.11_110.0971m/z | 110.097 | 12.11 | 9.53E-01 | 1.02 | short-day flies |
| 8.51_654.5676m/z | 654.568 | 8.51 | 9.53E-01 | 1.01 | long-day flies |
| 13.84_221.1193m/z | 221.119 | 13.84 | 9.54E-01 | 1.01 | long-day flies |
| 8.03_575.5058m/z | 575.506 | 8.03 | 9.56E-01 | 1.03 | long-day flies |
| 9.41_109.1022m/z | 109.102 | 9.41 | 9.57E-01 | 1.18 | long-day flies |
| 2.17_518.3248m/z | 518.325 | 2.17 | 9.58E-01 | 2.14 | long-day flies |
| 10.23_892.8320m/z | 892.832 | 10.23 | 9.59E-01 | 1.02 | short-day flies |
| 5.33_53.0527n | 95.086 | 5.33 | 9.59E-01 | 1.02 | short-day flies |
| 8.41_411.3469m/z | 411.347 | 8.41 | 9.60E-01 | 1.06 | long-day flies |
| 6.64_712.4919m/z | 712.492 | 6.64 | 9.60E-01 | 1.03 | long-day flies |
| 13.20_110.0973m/z | 110.097 | 13.20 | 9.61E-01 | 1.02 | long-day flies |
| 3.43_357.3013m/z | 357.301 | 3.43 | 9.61E-01 | 1.01 | short-day flies |
| 10.01_901.8113n | 902.819 | 10.01 | 9.61E-01 | 1.01 | short-day flies |
| 8.38_638.5727m/z | 638.573 | 8.38 | 9.61E-01 | 1.04 | long-day flies |
| 11.39_96.0806m/z | 96.081 | 11.39 | 9.62E-01 | 1.02 | long-day flies |
| 6.56_340.3569m/z | 340.357 | 6.56 | 9.63E-01 | 1.06 | short-day flies |
| 3.99_391.3147m/z | 391.315 | 3.99 | 9.64E-01 | 1.00 | long-day flies |
| 3.08_400.3424m/z | 400.342 | 3.08 | 9.66E-01 | 1.08 | long-day flies |
| 12.39_135.0816m/z | 135.082 | 12.39 | 9.66E-01 | 1.01 | short-day flies |
| 8.87_761.6492m/z | 761.649 | 8.87 | 9.67E-01 | 1.08 | long-day flies |
| 8.08_600.5196m/z | 600.520 | 8.08 | 9.68E-01 | 1.09 | short-day flies |
| 10.24_331.2862m/z | 331.286 | 10.24 | 9.68E-01 | 1.01 | short-day flies |
| 10.30_56.0510m/z | 56.051 | 10.30 | 9.68E-01 | 1.03 | short-day flies |
| 7.08_257.2123m/z | 257.212 | 7.08 | 9.70E-01 | 1.01 | short-day flies |
| 11.81_58.0668m/z | 58.067 | 11.81 | 9.71E-01 | 1.10 | short-day flies |
| 6.23_382.3687m/z | 382.369 | 6.23 | 9.72E-01 | 1.02 | short-day flies |
| 7.31_375.4002m/z | 375.400 | 7.31 | 9.72E-01 | 1.18 | long-day flies |
| 4.33_422.2448m/z | 422.245 | 4.33 | 9.73E-01 | 1.14 | long-day flies |
| 15.07_133.9833m/z | 133.983 | 15.07 | 9.74E-01 | 1.02 | short-day flies |
| 9.75_808.7388m/z | 808.739 | 9.75 | 9.75E-01 | 1.01 | short-day flies |
| 6.84_723.5888m/z | 723.589 | 6.84 | 9.75E-01 | 1.02 | short-day flies |
| 6.56_899.5119m/z | 899.512 | 6.56 | 9.76E-01 | 1.07 | short-day flies |
| 7.91_685.2079m/z | 685.208 | 7.91 | 9.77E-01 | 1.03 | long-day flies |
| 10.55_962.9110m/z | 962.911 | 10.55 | 9.79E-01 | 1.00 | short-day flies |
| 9.34_883.7515m/z | 883.752 | 9.34 | 9.79E-01 | 1.00 | long-day flies |
| 2.05_179.1090m/z | 179.109 | 2.05 | 9.80E-01 | 1.03 | long-day flies |
| 13.18_89.0606m/z | 89.061 | 13.18 | 9.80E-01 | 1.05 | long-day flies |
| 5.20_83.0866m/z | 83.087 | 5.20 | 9.81E-01 | 1.08 | long-day flies |
| 2.11_660.4895m/z | 660.490 | 2.11 | 9.82E-01 | 1.00 | long-day flies |
| 3.00_526.3596m/z | 526.360 | 3.00 | 9.82E-01 | 1.00 | short-day flies |
| 8.42_627.5438n | 628.551 | 8.42 | 9.82E-01 | 1.05 | short-day flies |
| 3.73_59.0616m/z | 59.062 | 3.73 | 9.82E-01 | 1.00 | short-day flies |
| 7.15_510.4285n | 528.462 | 7.15 | 9.83E-01 | 1.01 | short-day flies |
| 7.56_535.4333m/z | 535.433 | 7.56 | 9.83E-01 | 1.01 | short-day flies |
| 14.32_58.0664m/z | 58.066 | 14.32 | 9.83E-01 | 1.02 | long-day flies |
| 7.44_742.5402m/z | 742.540 | 7.44 | 9.86E-01 | 1.00 | long-day flies |
| 5.35_780.4883m/z | 780.488 | 5.35 | 9.86E-01 | 1.04 | long-day flies |
| 12.09_89.0597m/z | 89.060 | 12.09 | 9.86E-01 | 1.01 | long-day flies |
| 7.94_684.2067m/z | 684.207 | 7.94 | 9.87E-01 | 1.07 | long-day flies |
| 2.82_514.3125m/z | 514.312 | 2.82 | 9.87E-01 | 1.05 | short-day flies |
| 7.30_317.3205m/z | 317.321 | 7.30 | 9.89E-01 | 1.14 | long-day flies |
| 5.95_694.4682m/z | 694.468 | 5.95 | 9.91E-01 | 1.05 | short-day flies |
| 12.05_140.1082m/z | 140.108 | 12.05 | 9.92E-01 | 1.04 | short-day flies |
| 6.15_369.3367m/z | 369.337 | 6.15 | 9.93E-01 | 1.16 | long-day flies |
| 9.07_794.6227n | 812.656 | 9.07 | 9.93E-01 | 1.00 | short-day flies |
| 2.15_616.4640m/z | 616.464 | 2.15 | 9.93E-01 | 1.00 | short-day flies |
| 9.94_888.8041m/z | 888.804 | 9.94 | 9.94E-01 | 1.08 | short-day flies |
| 8.73_679.5834m/z | 679.583 | 8.73 | 9.96E-01 | 1.30 | long-day flies |
| 8.41_450.4312m/z | 450.431 | 8.41 | 9.97E-01 | 1.05 | short-day flies |
| 8.82_794.6817m/z | 794.682 | 8.82 | 9.97E-01 | 1.01 | short-day flies |
| 5.33_279.1609m/z | 279.161 | 5.33 | 9.98E-01 | 1.03 | short-day flies |
| 7.61_676.5259m/z | 676.526 | 7.61 | 9.98E-01 | 1.07 | short-day flies |
| 5.73_805.1587m/z | 805.159 | 5.73 | 9.99E-01 | 1.06 | short-day flies |
| 2.62_410.3478m/z | 410.348 | 2.62 | 9.99E-01 | 1.12 | long-day flies |

**Table S2**

Annotated lipid features in the heads of Canton-S flies that were reared under short-day and long-day conditions. Each lipid feature ID is defined by its retention time and mass-to-charge ratio. ANOVA p-values were calculated to highlight significant differences (p ≤ 0.05) between short-day and long-day flies, and these are shown in green. Fold changes were calculated by dividing the average values from the five replicates, and these values are shown in the heat map (the highest value is highlighted in red, and the lowest in white). The highest mean indicates the group with the highest averaged peak areas.

| Compound ID | m/z | Retention time (min) | Anova (p) | Max Fold Change | Highest Mean |
| --- | --- | --- | --- | --- | --- |
| 7.78_85.7995m/z | 85.800 | 7.78 | 5.01E-03 | 1.92 | long-day flies |
| 9.47_56.0506m/z | 56.051 | 9.47 | 5.02E-03 | 4.55 | short-day flies |
| 9.74_379.3372m/z | 379.337 | 9.74 | 6.27E-03 | 1.34 | short-day flies |
| 5.75_804.8268m/z | 804.827 | 5.75 | 9.40E-03 | 2.42 | long-day flies |
| 7.57_563.4679m/z | 563.468 | 7.57 | 1.03E-02 | 1.29 | short-day flies |
| 10.41_960.8816m/z | 960.882 | 10.41 | 1.59E-02 | 1.30 | short-day flies |
| 11.39_82.9895m/z | 82.989 | 11.39 | 1.61E-02 | 1.92 | short-day flies |
| 3.78_59.0618m/z | 59.062 | 3.78 | 1.64E-02 | 1.41 | short-day flies |
| 7.71_533.4562m/z | 533.456 | 7.71 | 1.65E-02 | 1.27 | short-day flies |
| 14.59_437.1954m/z | 437.195 | 14.59 | 1.94E-02 | 1.15 | short-day flies |
| 10.01_875.7952n | 876.803 | 10.01 | 2.22E-02 | 1.11 | short-day flies |
| 13.07_82.9902m/z | 82.990 | 13.07 | 2.62E-02 | 1.48 | long-day flies |
| 7.49_497.3981m/z | 497.398 | 7.49 | 2.72E-02 | 1.16 | long-day flies |
| 8.01_704.5599m/z | 704.560 | 8.01 | 2.93E-02 | 1.50 | long-day flies |
| 9.55_896.7739m/z | 896.774 | 9.55 | 2.96E-02 | 1.51 | short-day flies |
| 7.63_610.1849m/z | 610.185 | 7.63 | 3.09E-02 | 1.60 | short-day flies |
| 14.45_321.1330m/z | 321.133 | 14.45 | 3.19E-02 | 1.58 | short-day flies |
| 3.50_411.1828m/z | 411.183 | 3.50 | 3.32E-02 | 1.61 | long-day flies |
| 5.73_805.4942m/z | 805.494 | 5.73 | 3.40E-02 | 1.63 | long-day flies |
| 3.44_439.3031m/z | 439.303 | 3.44 | 3.57E-02 | 1.38 | long-day flies |
| 9.93_369.3502m/z | 369.350 | 9.93 | 3.60E-02 | 2.87 | short-day flies |
| 14.04_96.0825m/z | 96.082 | 14.04 | 3.86E-02 | 1.52 | long-day flies |
| 9.94_109.1016m/z | 109.102 | 9.94 | 3.92E-02 | 1.51 | short-day flies |
| 5.40_570.4136n | 588.448 | 5.40 | 4.10E-02 | 2.43 | short-day flies |
| 4.95_951.6221m/z | 951.622 | 4.95 | 4.11E-02 | 1.72 | long-day flies |
| 13.12_123.0813m/z | 123.081 | 13.12 | 4.18E-02 | 1.21 | short-day flies |
| 7.82_750.5415m/z | 750.542 | 7.82 | 4.35E-02 | 1.15 | short-day flies |
| 2.91_556.4434m/z | 556.443 | 2.91 | 4.38E-02 | 1.32 | long-day flies |
| 2.11_704.5171m/z | 704.517 | 2.11 | 4.49E-02 | 1.34 | long-day flies |
| 15.08_119.9803n | 120.988 | 15.08 | 4.67E-02 | 1.22 | short-day flies |
| 6.82_547.4015m/z | 547.402 | 6.82 | 4.70E-02 | 5.88 | long-day flies |
| 7.52_123.0813m/z | 123.081 | 7.52 | 4.72E-02 | 1.68 | short-day flies |
| 7.68_59.0620m/z | 59.062 | 7.68 | 4.85E-02 | 1.11 | short-day flies |
| 10.55_962.9110m/z | 962.911 | 10.55 | 4.93E-02 | 1.36 | short-day flies |
| 8.70_123.0810m/z | 123.081 | 8.70 | 5.19E-02 | 1.29 | short-day flies |
| 5.38_629.4747m/z | 629.475 | 5.38 | 5.22E-02 | 2.65 | short-day flies |
| 3.48_232.0761m/z | 232.076 | 3.48 | 5.35E-02 | Infinity | long-day flies |
| 6.70_449.3608m/z | 449.361 | 6.70 | 5.42E-02 | 1.54 | short-day flies |
| 3.57_464.3586m/z | 464.359 | 3.57 | 5.70E-02 | 2.66 | short-day flies |
| 7.80_778.5569m/z | 778.557 | 7.80 | 5.86E-02 | 1.29 | long-day flies |
| 8.31_163.1120m/z | 163.112 | 8.31 | 5.91E-02 | 1.45 | short-day flies |
| 6.70_269.2114m/z | 269.211 | 6.70 | 5.96E-02 | 1.32 | short-day flies |
| 12.03_58.0664m/z | 58.066 | 12.03 | 6.09E-02 | 1.51 | long-day flies |
| 7.93_685.2076m/z | 685.208 | 7.93 | 6.18E-02 | 1.52 | short-day flies |
| 7.26_586.4390m/z | 586.439 | 7.26 | 6.28E-02 | 1.17 | long-day flies |
| 12.95_531.2767m/z | 531.277 | 12.95 | 6.51E-02 | 1.21 | short-day flies |
| 8.11_605.5048m/z | 605.505 | 8.11 | 6.57E-02 | 1.29 | short-day flies |
| 11.43_89.0613m/z | 89.061 | 11.43 | 6.69E-02 | 1.84 | short-day flies |
| 3.42_407.3362m/z | 407.336 | 3.42 | 6.77E-02 | 2.23 | long-day flies |
| 7.47_786.5871m/z | 786.587 | 7.47 | 6.87E-02 | 1.18 | short-day flies |
| 10.43_934.8816m/z | 934.882 | 10.43 | 6.92E-02 | 1.27 | short-day flies |
| 10.97_135.0807m/z | 135.081 | 10.97 | 7.26E-02 | 1.37 | long-day flies |
| 9.95_253.1944m/z | 253.194 | 9.95 | 7.32E-02 | 1.23 | short-day flies |
| 7.46_806.5732m/z | 806.573 | 7.46 | 7.32E-02 | 1.50 | short-day flies |
| 2.03_224.1290m/z | 224.129 | 2.03 | 7.37E-02 | 1.15 | short-day flies |
| 8.27_97.0665m/z | 97.067 | 8.27 | 7.44E-02 | 1.52 | long-day flies |
| 4.30_453.3196m/z | 453.320 | 4.30 | 7.48E-02 | 1.33 | long-day flies |
| 7.67_383.3156m/z | 383.316 | 7.67 | 7.63E-02 | 1.10 | short-day flies |
| 5.32_335.3321m/z | 335.332 | 5.32 | 8.01E-02 | 1.49 | short-day flies |
| 7.22_698.5566m/z | 698.557 | 7.22 | 8.09E-02 | 1.21 | short-day flies |
| 5.77_109.1020m/z | 109.102 | 5.77 | 8.33E-02 | 1.66 | long-day flies |
| 3.57_171.1391m/z | 171.139 | 3.57 | 8.38E-02 | 2.21 | short-day flies |
| 2.36_357.2121m/z | 357.212 | 2.36 | 8.56E-02 | 1.39 | long-day flies |
| 13.80_551.5031m/z | 551.503 | 13.80 | 8.56E-02 | 1.39 | short-day flies |
| 10.30_906.8509m/z | 906.851 | 10.30 | 8.60E-02 | 1.33 | short-day flies |
| 4.26_496.4200m/z | 496.420 | 4.26 | 8.78E-02 | 2.11 | long-day flies |
| 9.20_56.0521m/z | 56.052 | 9.20 | 8.93E-02 | 1.22 | short-day flies |
| 9.41_894.7579m/z | 894.758 | 9.41 | 8.98E-02 | 2.07 | short-day flies |
| 6.66_81.0706m/z | 81.071 | 6.66 | 9.01E-02 | 178.45 | long-day flies |
| 10.03_928.8372m/z | 928.837 | 10.03 | 9.01E-02 | 1.69 | short-day flies |
| 15.07_284.9917m/z | 284.992 | 15.07 | 9.13E-02 | 1.47 | long-day flies |
| 2.93_512.4170m/z | 512.417 | 2.93 | 9.57E-02 | 1.33 | short-day flies |
| 11.14_58.0664m/z | 58.066 | 11.14 | 9.88E-02 | 1.98 | short-day flies |
| 7.67_554.4542n | 572.488 | 7.67 | 9.91E-02 | 1.09 | short-day flies |
| 5.32_123.0814m/z | 123.081 | 5.32 | 9.94E-02 | 1.21 | short-day flies |
| 10.17_878.8195m/z | 878.820 | 10.17 | 1.00E-01 | 1.13 | short-day flies |
| 5.76_489.3112m/z | 489.311 | 5.76 | 1.00E-01 | 1.64 | long-day flies |
| 12.90_267.2686m/z | 267.269 | 12.90 | 1.01E-01 | 1.11 | short-day flies |
| 15.07_365.1061m/z | 365.106 | 15.07 | 1.04E-01 | 1.34 | short-day flies |
| 10.82_119.0865m/z | 119.086 | 10.82 | 1.05E-01 | 1.08 | short-day flies |
| 13.40_123.0813m/z | 123.081 | 13.40 | 1.05E-01 | 1.32 | long-day flies |
| 4.26_441.3173m/z | 441.317 | 4.26 | 1.06E-01 | 1.44 | long-day flies |
| 15.10_128.9544m/z | 128.954 | 15.10 | 1.07E-01 | 1.15 | short-day flies |
| 7.46_601.5158m/z | 601.516 | 7.46 | 1.07E-01 | 1.35 | short-day flies |
| 7.28_665.4510m/z | 665.451 | 7.28 | 1.07E-01 | 1.38 | long-day flies |
| 9.35_932.6936m/z | 932.694 | 9.35 | 1.07E-01 | 1.70 | short-day flies |
| 8.35_569.4965m/z | 569.497 | 8.35 | 1.07E-01 | 1.18 | short-day flies |
| 9.94_660.5878n | 678.621 | 9.94 | 1.09E-01 | 1.26 | short-day flies |
| 11.82_96.0822m/z | 96.082 | 11.82 | 1.09E-01 | 1.86 | short-day flies |
| 6.46_728.5247m/z | 728.525 | 6.46 | 1.15E-01 | 1.39 | long-day flies |
| 8.85_734.6311m/z | 734.631 | 8.85 | 1.15E-01 | 2.28 | long-day flies |
| 9.95_379.3371m/z | 379.337 | 9.95 | 1.16E-01 | 1.14 | short-day flies |
| 10.95_89.0612m/z | 89.061 | 10.95 | 1.16E-01 | 1.45 | long-day flies |
| 7.98_123.0810m/z | 123.081 | 7.98 | 1.16E-01 | 1.31 | short-day flies |
| 7.00_736.4916m/z | 736.492 | 7.00 | 1.19E-01 | 1.48 | long-day flies |
| 7.71_529.4623m/z | 529.462 | 7.71 | 1.19E-01 | 1.33 | short-day flies |
| 11.20_155.1090m/z | 155.109 | 11.20 | 1.19E-01 | 1.20 | short-day flies |
| 9.34_142.1242m/z | 142.124 | 9.34 | 1.22E-01 | 1.76 | short-day flies |
| 15.08_150.0454n | 173.035 | 15.08 | 1.23E-01 | 1.12 | short-day flies |
| 12.50_128.1109m/z | 128.111 | 12.50 | 1.24E-01 | 1.19 | short-day flies |
| 5.53_1150.2361m/z | 1150.236 | 5.53 | 1.24E-01 | 1.66 | long-day flies |
| 2.24_422.3246n | 440.359 | 2.24 | 1.24E-01 | 1.14 | long-day flies |
| 15.06_589.3317m/z | 589.332 | 15.06 | 1.27E-01 | 1.14 | long-day flies |
| 3.57_107.0712m/z | 107.071 | 3.57 | 1.27E-01 | 1.99 | short-day flies |
| 2.84_644.4942m/z | 644.494 | 2.84 | 1.28E-01 | 1.42 | long-day flies |
| 5.23_672.7586m/z | 672.759 | 5.23 | 1.29E-01 | 1.25 | long-day flies |
| 7.79_607.3872m/z | 607.387 | 7.79 | 1.31E-01 | 1.08 | short-day flies |
| 15.09_178.1323m/z | 178.132 | 15.09 | 1.31E-01 | 1.15 | long-day flies |
| 12.24_89.0612m/z | 89.061 | 12.24 | 1.32E-01 | 1.51 | short-day flies |
| 8.01_567.5002m/z | 567.500 | 8.01 | 1.33E-01 | 2.63 | long-day flies |
| 2.61_89.0609m/z | 89.061 | 2.61 | 1.36E-01 | 1.84 | short-day flies |
| 6.69_287.2229m/z | 287.223 | 6.69 | 1.37E-01 | 1.37 | short-day flies |
| 6.64_802.5398m/z | 802.540 | 6.64 | 1.38E-01 | 1.31 | short-day flies |
| 14.50_96.0804m/z | 96.080 | 14.50 | 1.39E-01 | 1.46 | short-day flies |
| 10.06_381.3502m/z | 381.350 | 10.06 | 1.41E-01 | 1.15 | short-day flies |
| 9.61_685.4374m/z | 685.437 | 9.61 | 1.41E-01 | 1.49 | short-day flies |
| 10.83_82.9916m/z | 82.992 | 10.83 | 1.42E-01 | 1.29 | short-day flies |
| 3.16_688.5256m/z | 688.526 | 3.16 | 1.43E-01 | 3.16 | long-day flies |
| 9.72_898.7883m/z | 898.788 | 9.72 | 1.45E-01 | 1.42 | short-day flies |
| 6.69_428.3817m/z | 428.382 | 6.69 | 1.46E-01 | 1.60 | short-day flies |
| 2.59_291.2541m/z | 291.254 | 2.59 | 1.46E-01 | 2.03 | short-day flies |
| 3.12_570.8204m/z | 570.820 | 3.12 | 1.46E-01 | 1.33 | long-day flies |
| 15.08_186.9964m/z | 186.996 | 15.08 | 1.50E-01 | 1.11 | short-day flies |
| 5.41_788.5534m/z | 788.553 | 5.41 | 1.50E-01 | 1.44 | short-day flies |
| 7.55_601.5171m/z | 601.517 | 7.55 | 1.52E-01 | 1.21 | short-day flies |
| 2.47_488.3593m/z | 488.359 | 2.47 | 1.53E-01 | 1.59 | short-day flies |
| 3.15_109.0658m/z | 109.066 | 3.15 | 1.56E-01 | 1.47 | short-day flies |
| 10.18_383.3660m/z | 383.366 | 10.18 | 1.57E-01 | 1.30 | short-day flies |
| 5.34_71.0868m/z | 71.087 | 5.34 | 1.62E-01 | 1.34 | short-day flies |
| 3.41_424.3623m/z | 424.362 | 3.41 | 1.62E-01 | 1.71 | long-day flies |
| 15.07_111.0921m/z | 111.092 | 15.07 | 1.63E-01 | 1.11 | short-day flies |
| 9.36_990.7520m/z | 990.752 | 9.36 | 1.63E-01 | 2.42 | short-day flies |
| 2.63_246.2211n | 247.228 | 2.63 | 1.64E-01 | 1.89 | short-day flies |
| 15.10_144.9853m/z | 144.985 | 15.10 | 1.65E-01 | 1.27 | short-day flies |
| 15.01_685.4357m/z | 685.436 | 15.01 | 1.66E-01 | 1.09 | long-day flies |
| 5.53_767.1496m/z | 767.150 | 5.53 | 1.68E-01 | 1.23 | long-day flies |
| 10.55_1195.1325m/z | 1195.132 | 10.55 | 1.70E-01 | 1.48 | short-day flies |
| 11.57_58.0664m/z | 58.066 | 11.57 | 1.70E-01 | 1.40 | short-day flies |
| 9.67_523.4710m/z | 523.471 | 9.67 | 1.71E-01 | 1.34 | long-day flies |
| 13.47_82.9913m/z | 82.991 | 13.47 | 1.71E-01 | 2.29 | long-day flies |
| 9.01_713.6429m/z | 713.643 | 9.01 | 1.72E-01 | 2.03 | long-day flies |
| 8.95_685.4356m/z | 685.436 | 8.95 | 1.72E-01 | 1.38 | short-day flies |
| 15.09_104.9930m/z | 104.993 | 15.09 | 1.73E-01 | 1.10 | short-day flies |
| 12.97_159.0238m/z | 159.024 | 12.97 | 1.73E-01 | 1.97 | long-day flies |
| 12.35_331.2851m/z | 331.285 | 12.35 | 1.75E-01 | 1.26 | short-day flies |
| 3.79_481.3140m/z | 481.314 | 3.79 | 1.75E-01 | 1.19 | long-day flies |
| 2.12_567.3654m/z | 567.365 | 2.12 | 1.75E-01 | 1.20 | long-day flies |
| 9.27_89.0609m/z | 89.061 | 9.27 | 1.76E-01 | 1.62 | long-day flies |
| 13.19_128.1101m/z | 128.110 | 13.19 | 1.77E-01 | 1.19 | short-day flies |
| 12.75_321.1379m/z | 321.138 | 12.75 | 1.78E-01 | 1.32 | short-day flies |
| 6.19_283.2613m/z | 283.261 | 6.19 | 1.78E-01 | 1.33 | long-day flies |
| 9.94_125.1332m/z | 125.133 | 9.94 | 1.78E-01 | 1.20 | short-day flies |
| 7.00_814.6084m/z | 814.608 | 7.00 | 1.79E-01 | 1.73 | short-day flies |
| 3.76_712.9095m/z | 712.910 | 3.76 | 1.79E-01 | 1.33 | long-day flies |
| 5.58_734.4472m/z | 734.447 | 5.58 | 1.80E-01 | 1.81 | long-day flies |
| 9.14_814.6925m/z | 814.693 | 9.14 | 1.82E-01 | 2.02 | long-day flies |
| 5.13_616.0424m/z | 616.042 | 5.13 | 1.84E-01 | 1.25 | long-day flies |
| 13.60_109.1013m/z | 109.101 | 13.60 | 1.84E-01 | 1.54 | short-day flies |
| 11.96_110.0968m/z | 110.097 | 11.96 | 1.86E-01 | 1.20 | long-day flies |
| 3.61_284.3326m/z | 284.333 | 3.61 | 1.87E-01 | 7.71 | short-day flies |
| 9.67_810.7426m/z | 810.743 | 9.67 | 1.87E-01 | 1.46 | long-day flies |
| 9.54_824.6864m/z | 824.686 | 9.54 | 1.90E-01 | 1.22 | long-day flies |
| 5.63_427.2522m/z | 427.252 | 5.63 | 1.91E-01 | 1.13 | long-day flies |
| 8.68_640.5905m/z | 640.591 | 8.68 | 1.91E-01 | 1.50 | short-day flies |
| 3.99_351.3267m/z | 351.327 | 3.99 | 1.91E-01 | 1.55 | short-day flies |
| 5.72_109.0662m/z | 109.066 | 5.72 | 1.92E-01 | 1.51 | long-day flies |
| 6.42_678.4492n | 696.485 | 6.42 | 1.92E-01 | 1.13 | long-day flies |
| 2.87_600.4688m/z | 600.469 | 2.87 | 1.92E-01 | 1.17 | long-day flies |
| 3.33_169.0891m/z | 169.089 | 3.33 | 1.93E-01 | 1.51 | short-day flies |
| 3.56_297.2412m/z | 297.241 | 3.56 | 1.96E-01 | 1.94 | short-day flies |
| 4.72_781.9770m/z | 781.977 | 4.72 | 1.97E-01 | 1.14 | long-day flies |
| 4.96_634.7477m/z | 634.748 | 4.96 | 1.98E-01 | 1.52 | long-day flies |
| 3.57_275.2594m/z | 275.259 | 3.57 | 1.99E-01 | 2.10 | short-day flies |
| 2.17_572.4379m/z | 572.438 | 2.17 | 2.01E-01 | 1.24 | long-day flies |
| 10.17_904.8355m/z | 904.836 | 10.17 | 2.01E-01 | 1.15 | short-day flies |
| 2.37_209.0845m/z | 209.085 | 2.37 | 2.02E-01 | 1.47 | short-day flies |
| 2.73_442.2867m/z | 442.287 | 2.73 | 2.02E-01 | 1.12 | long-day flies |
| 5.89_568.4577m/z | 568.458 | 5.89 | 2.03E-01 | 1.21 | long-day flies |
| 4.50_809.5353m/z | 809.535 | 4.50 | 2.03E-01 | 1.38 | long-day flies |
| 12.21_279.1674m/z | 279.167 | 12.21 | 2.05E-01 | 1.18 | long-day flies |
| 3.29_556.4428m/z | 556.443 | 3.29 | 2.09E-01 | 1.93 | long-day flies |
| 15.29_224.1293m/z | 224.129 | 15.29 | 2.09E-01 | 1.32 | short-day flies |
| 7.23_790.6059m/z | 790.606 | 7.23 | 2.10E-01 | 1.47 | long-day flies |
| 11.43_109.0650m/z | 109.065 | 11.43 | 2.12E-01 | 1.61 | short-day flies |
| 5.53_767.4858m/z | 767.486 | 5.53 | 2.12E-01 | 1.18 | long-day flies |
| 7.59_169.0866m/z | 169.087 | 7.59 | 2.13E-01 | 1.43 | long-day flies |
| 6.45_601.5179m/z | 601.518 | 6.45 | 2.14E-01 | 1.29 | short-day flies |
| 5.95_127.1488m/z | 127.149 | 5.95 | 2.14E-01 | 1.39 | long-day flies |
| 4.75_421.1948m/z | 421.195 | 4.75 | 2.16E-01 | 33.27 | long-day flies |
| 2.81_514.3134m/z | 514.313 | 2.81 | 2.19E-01 | 1.22 | long-day flies |
| 3.58_89.0602m/z | 89.060 | 3.58 | 2.19E-01 | 1.61 | short-day flies |
| 9.86_900.8043m/z | 900.804 | 9.86 | 2.20E-01 | 1.37 | short-day flies |
| 10.11_916.8364m/z | 916.836 | 10.11 | 2.23E-01 | 1.55 | short-day flies |
| 4.15_123.0811m/z | 123.081 | 4.15 | 2.23E-01 | 1.26 | short-day flies |
| 8.39_664.6115m/z | 664.612 | 8.39 | 2.25E-01 | 1.40 | short-day flies |
| 6.58_340.3570m/z | 340.357 | 6.58 | 2.28E-01 | 1.37 | short-day flies |
| 7.11_573.4852m/z | 573.485 | 7.11 | 2.28E-01 | 1.30 | long-day flies |
| 11.68_129.0557m/z | 129.056 | 11.68 | 2.28E-01 | 1.24 | short-day flies |
| 2.47_630.4801m/z | 630.480 | 2.47 | 2.29E-01 | 1.15 | long-day flies |
| 4.49_810.0359m/z | 810.036 | 4.49 | 2.29E-01 | 1.25 | long-day flies |
| 6.04_524.3319m/z | 524.332 | 6.04 | 2.31E-01 | 1.47 | short-day flies |
| 2.62_410.3493m/z | 410.349 | 2.62 | 2.32E-01 | 1.32 | short-day flies |
| 5.47_1065.1602m/z | 1065.160 | 5.47 | 2.33E-01 | 1.29 | long-day flies |
| 14.53_589.3317m/z | 589.332 | 14.53 | 2.35E-01 | 1.15 | long-day flies |
| 8.58_113.0578m/z | 113.058 | 8.58 | 2.37E-01 | 1.33 | long-day flies |
| 5.53_1149.7351m/z | 1149.735 | 5.53 | 2.40E-01 | 1.89 | long-day flies |
| 9.39_930.6793m/z | 930.679 | 9.39 | 2.41E-01 | 1.47 | short-day flies |
| 9.93_862.7890m/z | 862.789 | 9.93 | 2.41E-01 | 1.35 | short-day flies |
| 2.57_641.4169m/z | 641.417 | 2.57 | 2.41E-01 | 1.12 | long-day flies |
| 7.03_804.5541m/z | 804.554 | 7.03 | 2.42E-01 | 1.19 | short-day flies |
| 4.32_725.4627m/z | 725.463 | 4.32 | 2.42E-01 | 1.12 | long-day flies |
| 5.21_540.4262m/z | 540.426 | 5.21 | 2.44E-01 | 1.17 | long-day flies |
| 10.01_901.8121n | 902.819 | 10.01 | 2.45E-01 | 1.24 | short-day flies |
| 10.40_986.9170m/z | 986.917 | 10.40 | 2.45E-01 | 1.23 | short-day flies |
| 7.51_561.4513m/z | 561.451 | 7.51 | 2.47E-01 | 1.24 | long-day flies |
| 2.83_59.0618m/z | 59.062 | 2.83 | 2.47E-01 | 1.78 | long-day flies |
| 15.06_741.6537m/z | 741.654 | 15.06 | 2.48E-01 | 1.25 | short-day flies |
| 9.71_871.7661n | 872.773 | 9.71 | 2.49E-01 | 1.10 | short-day flies |
| 2.73_441.7850m/z | 441.785 | 2.73 | 2.50E-01 | 1.12 | long-day flies |
| 13.05_531.2775m/z | 531.278 | 13.05 | 2.50E-01 | 1.13 | short-day flies |
| 3.69_655.8961m/z | 655.896 | 3.69 | 2.51E-01 | 1.26 | long-day flies |
| 2.46_674.5067m/z | 674.507 | 2.46 | 2.52E-01 | 1.11 | long-day flies |
| 12.72_58.0666m/z | 58.067 | 12.72 | 2.52E-01 | 1.29 | short-day flies |
| 13.47_58.0668m/z | 58.067 | 13.47 | 2.53E-01 | 1.57 | long-day flies |
| 5.33_167.0350m/z | 167.035 | 5.33 | 2.53E-01 | 1.11 | short-day flies |
| 15.08_192.0095m/z | 192.009 | 15.08 | 2.54E-01 | 1.26 | short-day flies |
| 6.98_778.5362m/z | 778.536 | 6.98 | 2.54E-01 | 1.18 | short-day flies |
| 8.30_680.4807m/z | 680.481 | 8.30 | 2.54E-01 | 1.07 | short-day flies |
| 11.75_184.1702m/z | 184.170 | 11.75 | 2.55E-01 | 1.32 | short-day flies |
| 3.23_600.4686m/z | 600.469 | 3.23 | 2.55E-01 | 2.34 | long-day flies |
| 9.10_493.4259m/z | 493.426 | 9.10 | 2.56E-01 | 1.44 | long-day flies |
| 2.15_616.4642m/z | 616.464 | 2.15 | 2.57E-01 | 1.13 | long-day flies |
| 3.31_512.4164m/z | 512.416 | 3.31 | 2.57E-01 | 2.11 | long-day flies |
| 2.32_664.4620m/z | 664.462 | 2.32 | 2.59E-01 | 1.38 | short-day flies |
| 12.66_123.0819m/z | 123.082 | 12.66 | 2.60E-01 | 1.10 | long-day flies |
| 5.94_899.5553m/z | 899.555 | 5.94 | 2.61E-01 | 1.45 | long-day flies |
| 9.53_849.7132m/z | 849.713 | 9.53 | 2.62E-01 | 1.16 | short-day flies |
| 12.61_58.0665m/z | 58.066 | 12.61 | 2.62E-01 | 1.22 | short-day flies |
| 4.29_413.3251m/z | 413.325 | 4.29 | 2.62E-01 | 1.19 | long-day flies |
| 7.17_1194.8247m/z | 1194.825 | 7.17 | 2.63E-01 | 1.08 | short-day flies |
| 2.80_59.0618m/z | 59.062 | 2.80 | 2.65E-01 | 1.43 | short-day flies |
| 9.19_1004.7283m/z | 1004.728 | 9.19 | 2.65E-01 | 1.35 | short-day flies |
| 15.07_241.0473m/z | 241.047 | 15.07 | 2.66E-01 | 1.24 | long-day flies |
| 11.05_123.0812m/z | 123.081 | 11.05 | 2.68E-01 | 1.15 | short-day flies |
| 3.26_655.8939m/z | 655.894 | 3.26 | 2.69E-01 | 1.29 | long-day flies |
| 5.33_279.1604m/z | 279.160 | 5.33 | 2.69E-01 | 1.13 | short-day flies |
| 7.98_203.1084m/z | 203.108 | 7.98 | 2.69E-01 | 1.15 | short-day flies |
| 9.19_946.6743m/z | 946.674 | 9.19 | 2.70E-01 | 1.34 | short-day flies |
| 3.55_617.3579m/z | 617.358 | 3.55 | 2.71E-01 | 1.10 | long-day flies |
| 6.59_129.0544m/z | 129.054 | 6.59 | 2.71E-01 | 1.68 | long-day flies |
| 8.31_253.2890m/z | 253.289 | 8.31 | 2.72E-01 | 1.19 | long-day flies |
| 6.27_421.2417m/z | 421.242 | 6.27 | 2.73E-01 | 1.36 | short-day flies |
| 11.86_128.1076m/z | 128.108 | 11.86 | 2.74E-01 | 1.17 | short-day flies |
| 8.09_641.5440m/z | 641.544 | 8.09 | 2.74E-01 | 1.61 | short-day flies |
| 11.86_257.2477m/z | 257.248 | 11.86 | 2.76E-01 | 1.14 | short-day flies |
| 10.31_1053.8907m/z | 1053.891 | 10.31 | 2.76E-01 | 1.22 | short-day flies |
| 5.39_169.0879m/z | 169.088 | 5.39 | 2.76E-01 | 1.18 | long-day flies |
| 5.91_320.3090n | 338.342 | 5.91 | 2.78E-01 | 1.08 | short-day flies |
| 5.99_431.3113m/z | 431.311 | 5.99 | 2.80E-01 | 53.79 | long-day flies |
| 8.31_569.4350m/z | 569.435 | 8.31 | 2.84E-01 | 1.12 | short-day flies |
| 9.10_739.6588m/z | 739.659 | 9.10 | 2.85E-01 | 1.91 | long-day flies |
| 2.97_570.8202m/z | 570.820 | 2.97 | 2.86E-01 | 1.18 | long-day flies |
| 9.39_757.6395m/z | 757.639 | 9.39 | 2.87E-01 | 1.17 | short-day flies |
| 2.73_882.5721m/z | 882.572 | 2.73 | 2.88E-01 | 1.17 | long-day flies |
| 5.33_149.0241m/z | 149.024 | 5.33 | 2.89E-01 | 1.07 | short-day flies |
| 10.24_918.8525m/z | 918.852 | 10.24 | 2.90E-01 | 1.25 | long-day flies |
| 10.15_930.8521m/z | 930.852 | 10.15 | 2.90E-01 | 1.19 | short-day flies |
| 7.36_580.4943m/z | 580.494 | 7.36 | 2.90E-01 | 1.12 | short-day flies |
| 10.77_127.1218m/z | 127.122 | 10.77 | 2.90E-01 | 1.34 | long-day flies |
| 10.06_680.6337m/z | 680.634 | 10.06 | 2.90E-01 | 1.15 | short-day flies |
| 12.69_119.0864m/z | 119.086 | 12.69 | 2.91E-01 | 1.12 | short-day flies |
| 15.10_144.9293m/z | 144.929 | 15.10 | 2.95E-01 | 1.32 | short-day flies |
| 8.35_313.2746m/z | 313.275 | 8.35 | 2.96E-01 | 1.06 | short-day flies |
| 10.62_89.0615m/z | 89.062 | 10.62 | 2.96E-01 | 1.52 | short-day flies |
| 8.40_529.4613m/z | 529.461 | 8.40 | 2.99E-01 | 1.34 | long-day flies |
| 2.63_107.0712m/z | 107.071 | 2.63 | 2.99E-01 | 1.65 | short-day flies |
| 7.28_607.3921m/z | 607.392 | 7.28 | 2.99E-01 | 1.43 | long-day flies |
| 3.36_468.3886m/z | 468.389 | 3.36 | 2.99E-01 | 1.76 | long-day flies |
| 4.37_539.2831m/z | 539.283 | 4.37 | 3.00E-01 | 1.17 | short-day flies |
| 8.02_311.2592m/z | 311.259 | 8.02 | 3.01E-01 | 1.34 | long-day flies |
| 2.51_427.3036m/z | 427.304 | 2.51 | 3.02E-01 | 1.25 | short-day flies |
| 5.23_1008.6454m/z | 1008.645 | 5.23 | 3.02E-01 | 1.15 | long-day flies |
| 2.12_424.3644m/z | 424.364 | 2.12 | 3.02E-01 | 1.95 | long-day flies |
| 2.04_307.1005m/z | 307.100 | 2.04 | 3.06E-01 | 1.30 | short-day flies |
| 10.29_934.6487m/z | 934.649 | 10.29 | 3.06E-01 | 1.09 | short-day flies |
| 3.75_712.4114m/z | 712.411 | 3.75 | 3.08E-01 | 1.26 | long-day flies |
| 5.65_412.3792m/z | 412.379 | 5.65 | 3.08E-01 | 1.45 | short-day flies |
| 7.75_473.2660m/z | 473.266 | 7.75 | 3.09E-01 | 1.09 | short-day flies |
| 10.42_819.8144m/z | 819.814 | 10.42 | 3.10E-01 | 1.27 | short-day flies |
| 12.73_551.5073m/z | 551.507 | 12.73 | 3.11E-01 | 1.11 | short-day flies |
| 8.44_411.3461m/z | 411.346 | 8.44 | 3.12E-01 | 1.54 | short-day flies |
| 3.37_59.0613m/z | 59.061 | 3.37 | 3.12E-01 | 1.72 | long-day flies |
| 11.87_133.0878m/z | 133.088 | 11.87 | 3.15E-01 | 1.18 | long-day flies |
| 3.94_703.4515m/z | 703.452 | 3.94 | 3.16E-01 | 1.23 | long-day flies |
| 9.86_873.7805n | 874.788 | 9.86 | 3.18E-01 | 1.07 | short-day flies |
| 4.84_578.3665m/z | 578.367 | 4.84 | 3.18E-01 | 1.22 | long-day flies |
| 7.57_621.5214m/z | 621.521 | 7.57 | 3.20E-01 | 1.18 | short-day flies |
| 9.98_151.1000m/z | 151.100 | 9.98 | 3.20E-01 | 1.31 | short-day flies |
| 6.99_756.5545m/z | 756.555 | 6.99 | 3.21E-01 | 1.09 | short-day flies |
| 7.37_563.4682m/z | 563.468 | 7.37 | 3.21E-01 | 1.19 | short-day flies |
| 12.89_58.0664m/z | 58.066 | 12.89 | 3.22E-01 | 1.13 | long-day flies |
| 4.22_540.4473m/z | 540.447 | 4.22 | 3.24E-01 | 2.02 | long-day flies |
| 11.15_100.0769m/z | 100.077 | 11.15 | 3.25E-01 | 1.11 | long-day flies |
| 3.47_363.3104m/z | 363.310 | 3.47 | 3.25E-01 | 1.66 | long-day flies |
| 12.88_133.0859m/z | 133.086 | 12.88 | 3.25E-01 | 1.14 | long-day flies |
| 4.72_782.4789m/z | 782.479 | 4.72 | 3.27E-01 | 1.10 | long-day flies |
| 2.08_358.2350m/z | 358.235 | 2.08 | 3.27E-01 | 1.12 | long-day flies |
| 9.51_836.7463m/z | 836.746 | 9.51 | 3.27E-01 | 1.19 | long-day flies |
| 14.65_82.9899m/z | 82.990 | 14.65 | 3.28E-01 | 1.42 | long-day flies |
| 13.04_58.0662m/z | 58.066 | 13.04 | 3.32E-01 | 1.24 | long-day flies |
| 2.27_379.3064m/z | 379.306 | 2.27 | 3.32E-01 | 1.10 | short-day flies |
| 2.47_351.2433m/z | 351.243 | 2.47 | 3.32E-01 | 1.33 | long-day flies |
| 4.84_866.5514m/z | 866.551 | 4.84 | 3.33E-01 | 1.13 | long-day flies |
| 5.90_302.2981n | 303.305 | 5.90 | 3.33E-01 | 1.28 | short-day flies |
| 9.32_796.6538m/z | 796.654 | 9.32 | 3.37E-01 | 1.31 | long-day flies |
| 9.87_903.8211m/z | 903.821 | 9.87 | 3.38E-01 | 1.50 | short-day flies |
| 8.01_566.4919n | 584.526 | 8.01 | 3.38E-01 | 1.37 | long-day flies |
| 10.85_267.2702m/z | 267.270 | 10.85 | 3.38E-01 | 1.09 | long-day flies |
| 5.14_616.7103m/z | 616.710 | 5.14 | 3.38E-01 | 1.16 | long-day flies |
| 15.08_75.0929m/z | 75.093 | 15.08 | 3.41E-01 | 1.16 | long-day flies |
| 3.38_499.3015m/z | 499.301 | 3.38 | 3.41E-01 | 1.09 | long-day flies |
| 9.45_127.1226m/z | 127.123 | 9.45 | 3.42E-01 | 1.14 | short-day flies |
| 3.43_59.0619m/z | 59.062 | 3.43 | 3.42E-01 | 1.18 | short-day flies |
| 9.79_860.7720m/z | 860.772 | 9.79 | 3.42E-01 | 1.35 | short-day flies |
| 4.36_657.3946m/z | 657.395 | 4.36 | 3.43E-01 | 1.07 | short-day flies |
| 6.39_484.4362m/z | 484.436 | 6.39 | 3.43E-01 | 1.14 | long-day flies |
| 9.06_795.6369m/z | 795.637 | 9.06 | 3.43E-01 | 1.18 | long-day flies |
| 9.41_880.7222m/z | 880.722 | 9.41 | 3.45E-01 | 1.31 | long-day flies |
| 4.33_724.9611m/z | 724.961 | 4.33 | 3.46E-01 | 1.12 | long-day flies |
| 6.59_871.7056m/z | 871.706 | 6.59 | 3.47E-01 | Infinity | long-day flies |
| 6.61_57.0712m/z | 57.071 | 6.61 | 3.47E-01 | Infinity | long-day flies |
| 6.55_57.0706m/z | 57.071 | 6.55 | 3.47E-01 | Infinity | long-day flies |
| 9.85_577.5177m/z | 577.518 | 9.85 | 3.47E-01 | 1.19 | short-day flies |
| 8.01_339.2909m/z | 339.291 | 8.01 | 3.52E-01 | 1.20 | long-day flies |
| 7.26_644.4924m/z | 644.492 | 7.26 | 3.53E-01 | 1.33 | long-day flies |
| 5.23_672.4251m/z | 672.425 | 5.23 | 3.55E-01 | 1.21 | long-day flies |
| 3.65_583.8742m/z | 583.874 | 3.65 | 3.56E-01 | 1.10 | long-day flies |
| 4.50_540.0233m/z | 540.023 | 4.50 | 3.57E-01 | 1.60 | long-day flies |
| 2.91_265.2508m/z | 265.251 | 2.91 | 3.58E-01 | 1.20 | short-day flies |
| 13.95_58.0663m/z | 58.066 | 13.95 | 3.58E-01 | 1.28 | long-day flies |
| 5.71_472.1141m/z | 472.114 | 5.71 | 3.59E-01 | 3.60 | short-day flies |
| 16.11_123.0810m/z | 123.081 | 16.11 | 3.59E-01 | 1.17 | long-day flies |
| 5.33_97.1019m/z | 97.102 | 5.33 | 3.59E-01 | 1.24 | short-day flies |
| 8.47_466.4612m/z | 466.461 | 8.47 | 3.60E-01 | 1.20 | long-day flies |
| 6.36_652.4343n | 670.469 | 6.36 | 3.61E-01 | 1.07 | long-day flies |
| 6.65_281.2118m/z | 281.212 | 6.65 | 3.62E-01 | 35.48 | long-day flies |
| 15.07_170.1299m/z | 170.130 | 15.07 | 3.62E-01 | 1.22 | short-day flies |
| 7.69_688.5519n | 689.559 | 7.69 | 3.63E-01 | 1.07 | short-day flies |
| 3.01_526.3605m/z | 526.361 | 3.01 | 3.65E-01 | 1.13 | long-day flies |
| 8.58_535.5451m/z | 535.545 | 8.58 | 3.66E-01 | 1.22 | short-day flies |
| 2.21_331.2178m/z | 331.218 | 2.21 | 3.66E-01 | 1.83 | long-day flies |
| 6.53_439.3775m/z | 439.378 | 6.53 | 3.66E-01 | 1.34 | long-day flies |
| 11.99_128.1091m/z | 128.109 | 11.99 | 3.68E-01 | 1.17 | short-day flies |
| 6.91_778.5378m/z | 778.538 | 6.91 | 3.68E-01 | 1.15 | short-day flies |
| 3.03_615.3472m/z | 615.347 | 3.03 | 3.69E-01 | 1.21 | short-day flies |
| 10.49_56.0513m/z | 56.051 | 10.49 | 3.70E-01 | 1.09 | short-day flies |
| 2.92_478.2946m/z | 478.295 | 2.92 | 3.70E-01 | 1.87 | short-day flies |
| 12.01_96.0819m/z | 96.082 | 12.01 | 3.71E-01 | 1.29 | short-day flies |
| 7.38_739.5090m/z | 739.509 | 7.38 | 3.71E-01 | 1.22 | long-day flies |
| 4.14_640.3877m/z | 640.388 | 4.14 | 3.72E-01 | 1.09 | long-day flies |
| 4.54_804.4895m/z | 804.490 | 4.54 | 3.72E-01 | 1.12 | long-day flies |
| 6.69_147.0661m/z | 147.066 | 6.69 | 3.72E-01 | 1.17 | short-day flies |
| 7.60_539.4685m/z | 539.468 | 7.60 | 3.74E-01 | 1.34 | long-day flies |
| 14.73_196.1693m/z | 196.169 | 14.73 | 3.74E-01 | 1.33 | long-day flies |
| 7.63_311.2584m/z | 311.258 | 7.63 | 3.75E-01 | 1.29 | long-day flies |
| 9.62_764.6792m/z | 764.679 | 9.62 | 3.76E-01 | 1.39 | long-day flies |
| 7.67_613.5154m/z | 613.515 | 7.67 | 3.76E-01 | 1.05 | short-day flies |
| 10.62_123.0810m/z | 123.081 | 10.62 | 3.76E-01 | 1.11 | short-day flies |
| 10.06_397.3831m/z | 397.383 | 10.06 | 3.79E-01 | 1.14 | short-day flies |
| 14.87_437.1941m/z | 437.194 | 14.87 | 3.80E-01 | 1.06 | short-day flies |
| 9.10_803.6896m/z | 803.690 | 9.10 | 3.80E-01 | 1.43 | long-day flies |
| 3.64_59.0615m/z | 59.061 | 3.64 | 3.80E-01 | 1.04 | short-day flies |
| 6.75_524.3312m/z | 524.331 | 6.75 | 3.82E-01 | 1.17 | short-day flies |
| 11.71_89.0607m/z | 89.061 | 11.71 | 3.83E-01 | 1.16 | short-day flies |
| 4.15_640.8893m/z | 640.889 | 4.15 | 3.84E-01 | 1.08 | long-day flies |
| 15.07_179.0289m/z | 179.029 | 15.07 | 3.85E-01 | 1.13 | long-day flies |
| 9.09_718.6110n | 736.645 | 9.09 | 3.86E-01 | 1.40 | long-day flies |
| 9.25_495.4391m/z | 495.439 | 9.25 | 3.86E-01 | 1.30 | long-day flies |
| 5.14_616.3760m/z | 616.376 | 5.14 | 3.86E-01 | 1.11 | long-day flies |
| 9.75_142.1225m/z | 142.122 | 9.75 | 3.86E-01 | 1.19 | short-day flies |
| 7.31_109.0681m/z | 109.068 | 7.31 | 3.88E-01 | 1.01 | long-day flies |
| 8.82_707.6067n | 708.614 | 8.82 | 3.88E-01 | 1.51 | long-day flies |
| 7.57_495.4408m/z | 495.441 | 7.57 | 3.88E-01 | 1.11 | short-day flies |
| 3.37_498.8002m/z | 498.800 | 3.37 | 3.88E-01 | 1.08 | long-day flies |
| 9.08_685.4333m/z | 685.433 | 9.08 | 3.91E-01 | 1.33 | short-day flies |
| 9.31_789.6851n | 790.692 | 9.31 | 3.91E-01 | 1.22 | long-day flies |
| 5.54_766.8165m/z | 766.817 | 5.54 | 3.92E-01 | 1.43 | long-day flies |
| 8.07_610.5457m/z | 610.546 | 8.07 | 3.93E-01 | 1.24 | long-day flies |
| 4.19_422.2484m/z | 422.248 | 4.19 | 3.94E-01 | 1.40 | long-day flies |
| 9.08_777.6737m/z | 777.674 | 9.08 | 3.94E-01 | 1.31 | long-day flies |
| 10.90_82.9893m/z | 82.989 | 10.90 | 3.95E-01 | 1.11 | long-day flies |
| 7.22_715.5592n | 716.566 | 7.22 | 3.98E-01 | 1.15 | short-day flies |
| 8.87_670.6015m/z | 670.602 | 8.87 | 3.99E-01 | 1.43 | long-day flies |
| 6.89_394.3466m/z | 394.347 | 6.89 | 4.00E-01 | 3.42 | long-day flies |
| 5.14_923.5672m/z | 923.567 | 5.14 | 4.00E-01 | 1.11 | long-day flies |
| 6.54_479.3717m/z | 479.372 | 6.54 | 4.01E-01 | 1.23 | short-day flies |
| 8.72_948.8262m/z | 948.826 | 8.72 | 4.01E-01 | 1.26 | short-day flies |
| 10.09_861.8114m/z | 861.811 | 10.09 | 4.01E-01 | 1.31 | long-day flies |
| 9.47_467.4098m/z | 467.410 | 9.47 | 4.01E-01 | 1.18 | long-day flies |
| 5.98_456.3830m/z | 456.383 | 5.98 | 4.02E-01 | 1.13 | short-day flies |
| 6.75_597.4869m/z | 597.487 | 6.75 | 4.02E-01 | 1.13 | long-day flies |
| 6.60_71.0865m/z | 71.086 | 6.60 | 4.04E-01 | 80.33 | long-day flies |
| 10.43_836.8434m/z | 836.843 | 10.43 | 4.06E-01 | 1.16 | short-day flies |
| 11.26_58.0664m/z | 58.066 | 11.26 | 4.07E-01 | 1.27 | long-day flies |
| 11.36_82.9897m/z | 82.990 | 11.36 | 4.08E-01 | 1.16 | short-day flies |
| 9.34_821.6690m/z | 821.669 | 9.34 | 4.08E-01 | 1.19 | long-day flies |
| 5.31_319.2983m/z | 319.298 | 5.31 | 4.11E-01 | 1.33 | short-day flies |
| 7.18_706.5383m/z | 706.538 | 7.18 | 4.11E-01 | 1.29 | long-day flies |
| 5.91_675.6769m/z | 675.677 | 5.91 | 4.14E-01 | 1.21 | short-day flies |
| 6.82_564.4280m/z | 564.428 | 6.82 | 4.17E-01 | 3.91 | long-day flies |
| 8.08_439.3775m/z | 439.377 | 8.08 | 4.17E-01 | 1.16 | short-day flies |
| 9.47_739.6693n | 740.677 | 9.47 | 4.17E-01 | 1.17 | long-day flies |
| 4.33_483.9752m/z | 483.975 | 4.33 | 4.17E-01 | 1.12 | long-day flies |
| 2.22_484.3851m/z | 484.385 | 2.22 | 4.18E-01 | 1.09 | long-day flies |
| 10.25_397.3836m/z | 397.384 | 10.25 | 4.20E-01 | 1.06 | long-day flies |
| 2.20_528.4108m/z | 528.411 | 2.20 | 4.22E-01 | 1.12 | long-day flies |
| 6.64_424.3548n | 425.362 | 6.64 | 4.23E-01 | 10.26 | long-day flies |
| 6.70_129.0556m/z | 129.056 | 6.70 | 4.23E-01 | 1.12 | short-day flies |
| 3.49_254.2497m/z | 254.250 | 3.49 | 4.23E-01 | 1.67 | long-day flies |
| 6.65_155.0711m/z | 155.071 | 6.65 | 4.24E-01 | 288.24 | long-day flies |
| 2.99_468.3894m/z | 468.389 | 2.99 | 4.25E-01 | 1.11 | short-day flies |
| 7.32_549.4877m/z | 549.488 | 7.32 | 4.25E-01 | 1.10 | short-day flies |
| 8.09_636.5576m/z | 636.558 | 8.09 | 4.25E-01 | 1.37 | short-day flies |
| 9.92_367.3370m/z | 367.337 | 9.92 | 4.27E-01 | 1.11 | short-day flies |
| 5.35_115.0396m/z | 115.040 | 5.35 | 4.28E-01 | 1.08 | long-day flies |
| 10.17_735.7564m/z | 735.756 | 10.17 | 4.29E-01 | 1.04 | long-day flies |
| 12.72_331.2858m/z | 331.286 | 12.72 | 4.29E-01 | 1.20 | long-day flies |
| 5.47_711.1055m/z | 711.105 | 5.47 | 4.29E-01 | 1.12 | long-day flies |
| 4.40_391.3388m/z | 391.339 | 4.40 | 4.30E-01 | 1.16 | long-day flies |
| 5.91_360.3242m/z | 360.324 | 5.91 | 4.33E-01 | 1.14 | short-day flies |
| 9.10_744.6277n | 762.661 | 9.10 | 4.33E-01 | 1.38 | long-day flies |
| 7.87_561.4526m/z | 561.453 | 7.87 | 4.33E-01 | 1.16 | short-day flies |
| 4.81_405.2461m/z | 405.246 | 4.81 | 4.34E-01 | 1.11 | short-day flies |
| 16.49_224.1297m/z | 224.130 | 16.49 | 4.35E-01 | 1.06 | short-day flies |
| 8.30_107.0494m/z | 107.049 | 8.30 | 4.36E-01 | 1.05 | short-day flies |
| 9.19_685.4351m/z | 685.435 | 9.19 | 4.37E-01 | 1.18 | short-day flies |
| 7.80_728.5592m/z | 728.559 | 7.80 | 4.37E-01 | 1.04 | short-day flies |
| 8.36_577.5213m/z | 577.521 | 8.36 | 4.38E-01 | 1.18 | short-day flies |
| 6.75_737.5002n | 738.508 | 6.75 | 4.38E-01 | 1.04 | short-day flies |
| 4.33_304.2620m/z | 304.262 | 4.33 | 4.39E-01 | 1.13 | short-day flies |
| 13.47_551.5048m/z | 551.505 | 13.47 | 4.39E-01 | 1.26 | short-day flies |
| 9.19_934.6447m/z | 934.645 | 9.19 | 4.39E-01 | 1.16 | short-day flies |
| 9.36_726.6624m/z | 726.662 | 9.36 | 4.39E-01 | 1.25 | long-day flies |
| 9.93_836.7710m/z | 836.771 | 9.93 | 4.40E-01 | 1.20 | short-day flies |
| 2.29_334.1789m/z | 334.179 | 2.29 | 4.41E-01 | 1.05 | long-day flies |
| 6.09_711.4970m/z | 711.497 | 6.09 | 4.42E-01 | 1.11 | short-day flies |
| 10.25_696.6669m/z | 696.667 | 10.25 | 4.43E-01 | 1.21 | long-day flies |
| 10.03_707.7305m/z | 707.731 | 10.03 | 4.44E-01 | 1.29 | long-day flies |
| 9.01_709.6218n | 710.629 | 9.01 | 4.44E-01 | 1.36 | long-day flies |
| 8.77_494.4934m/z | 494.493 | 8.77 | 4.45E-01 | 1.16 | short-day flies |
| 15.07_297.9913m/z | 297.991 | 15.07 | 4.46E-01 | 2.31 | short-day flies |
| 6.78_531.4072m/z | 531.407 | 6.78 | 4.47E-01 | 2.90 | long-day flies |
| 3.62_428.3382m/z | 428.338 | 3.62 | 4.48E-01 | 1.19 | long-day flies |
| 9.94_257.2454m/z | 257.245 | 9.94 | 4.52E-01 | 1.16 | short-day flies |
| 11.09_482.4051m/z | 482.405 | 11.09 | 4.54E-01 | 1.19 | long-day flies |
| 7.09_599.5016m/z | 599.502 | 7.09 | 4.55E-01 | 1.06 | long-day flies |
| 10.10_395.3668m/z | 395.367 | 10.10 | 4.56E-01 | 1.23 | long-day flies |
| 3.05_526.8589m/z | 526.859 | 3.05 | 4.56E-01 | 1.17 | long-day flies |
| 5.18_757.4294m/z | 757.429 | 5.18 | 4.57E-01 | 1.08 | long-day flies |
| 10.58_125.1046m/z | 125.105 | 10.58 | 4.58E-01 | 1.24 | long-day flies |
| 4.88_169.0874m/z | 169.087 | 4.88 | 4.58E-01 | 1.31 | short-day flies |
| 5.44_756.5049m/z | 756.505 | 5.44 | 4.59E-01 | 1.28 | long-day flies |
| 5.30_341.3056m/z | 341.306 | 5.30 | 4.60E-01 | 1.09 | short-day flies |
| 5.32_123.1175m/z | 123.118 | 5.32 | 4.60E-01 | 1.15 | short-day flies |
| 7.46_764.5210m/z | 764.521 | 7.46 | 4.61E-01 | 1.07 | long-day flies |
| 3.66_1165.7583m/z | 1165.758 | 3.66 | 4.62E-01 | 1.08 | long-day flies |
| 7.04_659.5131m/z | 659.513 | 7.04 | 4.63E-01 | 1.07 | long-day flies |
| 9.11_787.6709n | 788.678 | 9.11 | 4.63E-01 | 1.39 | long-day flies |
| 3.13_288.1761m/z | 288.176 | 3.13 | 4.63E-01 | 1.11 | short-day flies |
| 6.39_736.4928m/z | 736.493 | 6.39 | 4.63E-01 | 1.08 | short-day flies |
| 9.03_715.5854m/z | 715.585 | 9.03 | 4.64E-01 | 1.23 | long-day flies |
| 11.05_97.0643m/z | 97.064 | 11.05 | 4.64E-01 | 1.89 | short-day flies |
| 12.47_551.5039m/z | 551.504 | 12.47 | 4.65E-01 | 1.15 | short-day flies |
| 6.72_633.4969m/z | 633.497 | 6.72 | 4.66E-01 | 1.07 | long-day flies |
| 10.41_934.6449m/z | 934.645 | 10.41 | 4.67E-01 | 1.10 | short-day flies |
| 5.72_782.4978m/z | 782.498 | 5.72 | 4.67E-01 | 1.28 | long-day flies |
| 2.53_244.2284m/z | 244.228 | 2.53 | 4.67E-01 | 1.47 | long-day flies |
| 2.83_420.3098n | 438.346 | 2.83 | 4.68E-01 | 1.67 | short-day flies |
| 14.96_473.2655m/z | 473.266 | 14.96 | 4.69E-01 | 1.05 | short-day flies |
| 2.98_571.3219m/z | 571.322 | 2.98 | 4.69E-01 | 1.24 | long-day flies |
| 3.47_250.0885m/z | 250.089 | 3.47 | 4.71E-01 | 10.62 | long-day flies |
| 8.01_549.4881m/z | 549.488 | 8.01 | 4.71E-01 | 1.26 | long-day flies |
| 3.65_583.3728m/z | 583.373 | 3.65 | 4.71E-01 | 1.08 | long-day flies |
| 9.61_135.0814m/z | 135.081 | 9.61 | 4.71E-01 | 1.07 | short-day flies |
| 7.60_538.4594n | 561.451 | 7.60 | 4.71E-01 | 1.22 | long-day flies |
| 9.63_142.1225m/z | 142.123 | 9.63 | 4.73E-01 | 1.11 | short-day flies |
| 9.92_780.7415m/z | 780.742 | 9.92 | 4.73E-01 | 1.16 | long-day flies |
| 3.79_517.3842m/z | 517.384 | 3.79 | 4.73E-01 | 1.12 | long-day flies |
| 8.09_383.3155m/z | 383.316 | 8.09 | 4.74E-01 | 1.37 | short-day flies |
| 4.94_379.3184m/z | 379.318 | 4.94 | 4.75E-01 | 1.07 | long-day flies |
| 8.28_679.4319m/z | 679.432 | 8.28 | 4.75E-01 | 1.26 | long-day flies |
| 8.08_600.5201m/z | 600.520 | 8.08 | 4.76E-01 | 1.36 | short-day flies |
| 9.47_495.4403m/z | 495.440 | 9.47 | 4.76E-01 | 1.13 | long-day flies |
| 5.47_710.7675m/z | 710.767 | 5.47 | 4.77E-01 | 1.10 | long-day flies |
| 9.33_815.7018n | 816.709 | 9.33 | 4.77E-01 | 1.25 | long-day flies |
| 8.60_97.1014m/z | 97.101 | 8.60 | 4.82E-01 | 1.23 | long-day flies |
| 5.47_1065.6597m/z | 1065.660 | 5.47 | 4.82E-01 | 1.13 | long-day flies |
| 8.30_475.4143m/z | 475.414 | 8.30 | 4.83E-01 | 1.05 | short-day flies |
| 2.36_167.0350m/z | 167.035 | 2.36 | 4.84E-01 | 1.26 | short-day flies |
| 11.38_96.0816m/z | 96.082 | 11.38 | 4.84E-01 | 1.11 | short-day flies |
| 7.97_523.4723m/z | 523.472 | 7.97 | 4.85E-01 | 1.10 | short-day flies |
| 8.31_223.1344m/z | 223.134 | 8.31 | 4.85E-01 | 1.15 | short-day flies |
| 6.26_584.4537m/z | 584.454 | 6.26 | 4.86E-01 | 1.15 | long-day flies |
| 7.83_766.5340m/z | 766.534 | 7.83 | 4.86E-01 | 1.08 | short-day flies |
| 8.30_530.4698n | 548.504 | 8.30 | 4.88E-01 | 1.05 | short-day flies |
| 6.03_599.5028m/z | 599.503 | 6.03 | 4.88E-01 | 1.11 | short-day flies |
| 12.74_109.0665m/z | 109.066 | 12.74 | 4.88E-01 | 1.19 | short-day flies |
| 5.93_109.0664m/z | 109.066 | 5.93 | 4.89E-01 | 1.11 | long-day flies |
| 11.87_58.0670m/z | 58.067 | 11.87 | 4.90E-01 | 1.24 | short-day flies |
| 7.34_621.5219m/z | 621.522 | 7.34 | 4.90E-01 | 1.05 | short-day flies |
| 8.30_167.0713m/z | 167.071 | 8.30 | 4.90E-01 | 1.04 | short-day flies |
| 12.77_57.0590n | 58.066 | 12.77 | 4.91E-01 | 1.14 | short-day flies |
| 9.27_763.6686n | 764.676 | 9.27 | 4.91E-01 | 1.18 | long-day flies |
| 4.83_811.4996m/z | 811.500 | 4.83 | 4.92E-01 | 1.33 | long-day flies |
| 8.04_788.6175m/z | 788.617 | 8.04 | 4.94E-01 | 1.04 | short-day flies |
| 8.80_664.5643n | 682.598 | 8.80 | 4.94E-01 | 1.38 | long-day flies |
| 13.57_184.1709m/z | 184.171 | 13.57 | 4.95E-01 | 1.01 | short-day flies |
| 14.61_124.1120m/z | 124.112 | 14.61 | 4.96E-01 | 1.24 | short-day flies |
| 5.47_1066.1624m/z | 1066.162 | 5.47 | 4.96E-01 | 1.14 | long-day flies |
| 7.54_741.5313n | 742.539 | 7.54 | 4.97E-01 | 1.03 | short-day flies |
| 8.07_717.5909m/z | 717.591 | 8.07 | 4.97E-01 | 1.09 | short-day flies |
| 7.76_603.5328m/z | 603.533 | 7.76 | 4.97E-01 | 1.15 | long-day flies |
| 9.27_768.6965m/z | 768.696 | 9.27 | 4.98E-01 | 1.59 | short-day flies |
| 7.80_85.9552m/z | 85.955 | 7.80 | 4.98E-01 | 1.11 | long-day flies |
| 8.30_419.3519m/z | 419.352 | 8.30 | 4.99E-01 | 1.04 | short-day flies |
| 10.08_864.8044m/z | 864.804 | 10.08 | 4.99E-01 | 1.22 | short-day flies |
| 7.68_473.3989m/z | 473.399 | 7.68 | 5.00E-01 | 1.08 | short-day flies |
| 6.91_427.2519m/z | 427.252 | 6.91 | 5.01E-01 | 1.07 | long-day flies |
| 11.42_58.0664m/z | 58.066 | 11.42 | 5.02E-01 | 1.11 | short-day flies |
| 8.93_696.6142m/z | 696.614 | 8.93 | 5.02E-01 | 1.55 | long-day flies |
| 6.78_589.4600m/z | 589.460 | 6.78 | 5.05E-01 | 2.54 | long-day flies |
| 6.27_422.2481m/z | 422.248 | 6.27 | 5.06E-01 | 1.08 | short-day flies |
| 2.53_586.4532m/z | 586.453 | 2.53 | 5.06E-01 | 1.08 | long-day flies |
| 14.44_96.0809m/z | 96.081 | 14.44 | 5.07E-01 | 1.16 | short-day flies |
| 7.01_782.5703m/z | 782.570 | 7.01 | 5.07E-01 | 1.07 | short-day flies |
| 10.84_89.0602m/z | 89.060 | 10.84 | 5.09E-01 | 1.23 | short-day flies |
| 7.23_520.5072m/z | 520.507 | 7.23 | 5.10E-01 | 1.13 | long-day flies |
| 9.80_713.5621m/z | 713.562 | 9.80 | 5.11E-01 | 1.04 | short-day flies |
| 8.38_638.5729m/z | 638.573 | 8.38 | 5.13E-01 | 1.12 | short-day flies |
| 5.77_861.5442m/z | 861.544 | 5.77 | 5.13E-01 | 1.12 | long-day flies |
| 12.50_110.0973m/z | 110.097 | 12.50 | 5.14E-01 | 1.05 | short-day flies |
| 9.25_467.4091m/z | 467.409 | 9.25 | 5.15E-01 | 1.20 | long-day flies |
| 8.42_450.4308m/z | 450.431 | 8.42 | 5.15E-01 | 1.10 | long-day flies |
| 9.58_682.5926n | 700.626 | 9.58 | 5.16E-01 | 1.06 | short-day flies |
| 3.08_561.3605m/z | 561.361 | 3.08 | 5.17E-01 | 1.09 | short-day flies |
| 5.17_420.2687m/z | 420.269 | 5.17 | 5.19E-01 | 1.08 | short-day flies |
| 7.52_669.5351m/z | 669.535 | 7.52 | 5.21E-01 | 1.10 | short-day flies |
| 10.29_790.7780n | 791.785 | 10.29 | 5.21E-01 | 1.11 | short-day flies |
| 4.84_444.2103m/z | 444.210 | 4.84 | 5.21E-01 | 1.08 | short-day flies |
| 12.73_531.2770m/z | 531.277 | 12.73 | 5.22E-01 | 1.09 | short-day flies |
| 9.67_768.7085m/z | 768.708 | 9.67 | 5.23E-01 | 1.14 | long-day flies |
| 8.28_507.5138m/z | 507.514 | 8.28 | 5.23E-01 | 1.14 | short-day flies |
| 5.33_317.3210m/z | 317.321 | 5.33 | 5.24E-01 | 1.13 | short-day flies |
| 4.83_578.0324m/z | 578.032 | 4.83 | 5.24E-01 | 1.23 | long-day flies |
| 8.37_466.4608m/z | 466.461 | 8.37 | 5.24E-01 | 1.17 | short-day flies |
| 9.25_694.6102n | 712.644 | 9.25 | 5.25E-01 | 1.19 | long-day flies |
| 10.84_531.2770m/z | 531.277 | 10.84 | 5.25E-01 | 1.07 | long-day flies |
| 15.07_183.0240m/z | 183.024 | 15.07 | 5.26E-01 | 1.08 | long-day flies |
| 2.48_444.3330m/z | 444.333 | 2.48 | 5.26E-01 | 1.19 | short-day flies |
| 5.35_780.4832m/z | 780.483 | 5.35 | 5.27E-01 | 1.49 | long-day flies |
| 15.07_86.0716m/z | 86.072 | 15.07 | 5.27E-01 | 1.26 | short-day flies |
| 3.50_272.2596m/z | 272.260 | 3.50 | 5.27E-01 | 1.96 | long-day flies |
| 12.37_215.0864m/z | 215.086 | 12.37 | 5.30E-01 | 1.08 | short-day flies |
| 10.66_531.2782m/z | 531.278 | 10.66 | 5.30E-01 | 1.09 | long-day flies |
| 7.67_818.6424m/z | 818.642 | 7.67 | 5.31E-01 | 1.16 | long-day flies |
| 3.57_480.3085m/z | 480.309 | 3.57 | 5.32E-01 | 1.48 | short-day flies |
| 8.30_149.0604m/z | 149.060 | 8.30 | 5.33E-01 | 1.04 | short-day flies |
| 8.43_669.5782m/z | 669.578 | 8.43 | 5.36E-01 | 1.52 | short-day flies |
| 9.93_806.7608m/z | 806.761 | 9.93 | 5.36E-01 | 1.18 | long-day flies |
| 10.41_416.2157m/z | 416.216 | 10.41 | 5.36E-01 | 1.13 | short-day flies |
| 7.06_641.5035m/z | 641.503 | 7.06 | 5.36E-01 | 1.04 | short-day flies |
| 10.23_862.8234m/z | 862.823 | 10.23 | 5.36E-01 | 1.15 | long-day flies |
| 8.77_809.4830m/z | 809.483 | 8.77 | 5.36E-01 | 18019.37 | long-day flies |
| 7.49_420.3556m/z | 420.356 | 7.49 | 5.37E-01 | 1.07 | short-day flies |
| 5.50_522.3167m/z | 522.317 | 5.50 | 5.37E-01 | 1.48 | long-day flies |
| 4.82_405.2456n | 406.253 | 4.82 | 5.37E-01 | 1.07 | short-day flies |
| 8.67_619.5271m/z | 619.527 | 8.67 | 5.38E-01 | 1.08 | short-day flies |
| 7.61_729.4266m/z | 729.427 | 7.61 | 5.39E-01 | 1.25 | short-day flies |
| 5.29_267.2688m/z | 267.269 | 5.29 | 5.39E-01 | 1.10 | short-day flies |
| 7.70_203.1082m/z | 203.108 | 7.70 | 5.39E-01 | 1.06 | short-day flies |
| 10.15_763.7550m/z | 763.755 | 10.15 | 5.40E-01 | 1.10 | short-day flies |
| 9.86_796.7397m/z | 796.740 | 9.86 | 5.40E-01 | 1.09 | long-day flies |
| 15.03_321.1314m/z | 321.131 | 15.03 | 5.40E-01 | 1.07 | short-day flies |
| 10.28_932.8679m/z | 932.868 | 10.28 | 5.40E-01 | 1.10 | short-day flies |
| 9.53_885.7685m/z | 885.768 | 9.53 | 5.41E-01 | 1.15 | long-day flies |
| 9.40_804.7099m/z | 804.710 | 9.40 | 5.42E-01 | 1.16 | long-day flies |
| 9.25_720.6261n | 738.660 | 9.25 | 5.42E-01 | 1.19 | long-day flies |
| 15.10_184.9812m/z | 184.981 | 15.10 | 5.42E-01 | 1.11 | long-day flies |
| 10.47_129.0560m/z | 129.056 | 10.47 | 5.44E-01 | 1.23 | long-day flies |
| 6.38_575.5031m/z | 575.503 | 6.38 | 5.46E-01 | 1.16 | short-day flies |
| 5.32_353.3421m/z | 353.342 | 5.32 | 5.46E-01 | 1.12 | short-day flies |
| 5.42_101.0600m/z | 101.060 | 5.42 | 5.46E-01 | 1.27 | long-day flies |
| 9.00_493.4250m/z | 493.425 | 9.00 | 5.46E-01 | 1.31 | long-day flies |
| 8.37_612.5574m/z | 612.557 | 8.37 | 5.46E-01 | 1.13 | long-day flies |
| 10.43_908.8663m/z | 908.866 | 10.43 | 5.46E-01 | 1.12 | short-day flies |
| 9.48_791.7003n | 792.708 | 9.48 | 5.46E-01 | 1.09 | long-day flies |
| 7.80_721.5067m/z | 721.507 | 7.80 | 5.49E-01 | 1.03 | short-day flies |
| 4.58_111.0453m/z | 111.045 | 4.58 | 5.49E-01 | 1.17 | long-day flies |
| 6.39_758.4752m/z | 758.475 | 6.39 | 5.50E-01 | 1.17 | short-day flies |
| 6.58_127.1486m/z | 127.149 | 6.58 | 5.51E-01 | 1134.18 | long-day flies |
| 12.61_331.2848m/z | 331.285 | 12.61 | 5.52E-01 | 1.14 | short-day flies |
| 9.34_842.7254m/z | 842.725 | 9.34 | 5.53E-01 | 1.24 | long-day flies |
| 9.51_797.6653m/z | 797.665 | 9.51 | 5.55E-01 | 1.07 | short-day flies |
| 9.75_740.6788m/z | 740.679 | 9.75 | 5.55E-01 | 1.15 | long-day flies |
| 12.22_267.2676m/z | 267.268 | 12.22 | 5.56E-01 | 1.09 | short-day flies |
| 7.16_493.4259m/z | 493.426 | 7.16 | 5.57E-01 | 1.15 | long-day flies |
| 8.35_586.5416m/z | 586.542 | 8.35 | 5.58E-01 | 1.06 | short-day flies |
| 12.47_129.0550m/z | 129.055 | 12.47 | 5.58E-01 | 1.34 | short-day flies |
| 9.15_750.6625m/z | 750.662 | 9.15 | 5.58E-01 | 1.29 | long-day flies |
| 2.44_762.5592m/z | 762.559 | 2.44 | 5.59E-01 | 1.21 | long-day flies |
| 2.43_718.5326m/z | 718.533 | 2.43 | 5.60E-01 | 1.14 | long-day flies |
| 11.55_122.0950m/z | 122.095 | 11.55 | 5.60E-01 | 1.22 | long-day flies |
| 5.42_71.0864m/z | 71.086 | 5.42 | 5.60E-01 | 1.12 | long-day flies |
| 14.00_685.4367m/z | 685.437 | 14.00 | 5.62E-01 | 1.07 | short-day flies |
| 6.29_778.5392m/z | 778.539 | 6.29 | 5.62E-01 | 1.07 | long-day flies |
| 8.43_610.5168n | 628.551 | 8.43 | 5.63E-01 | 1.28 | short-day flies |
| 3.50_531.2750m/z | 531.275 | 3.50 | 5.63E-01 | 1.04 | long-day flies |
| 7.67_582.5140m/z | 582.514 | 7.67 | 5.63E-01 | 1.28 | long-day flies |
| 7.32_690.5070m/z | 690.507 | 7.32 | 5.65E-01 | 1.06 | short-day flies |
| 11.00_59.0623m/z | 59.062 | 11.00 | 5.65E-01 | 1.02 | long-day flies |
| 9.17_635.5979m/z | 635.598 | 9.17 | 5.66E-01 | 1.27 | long-day flies |
| 9.04_757.6483m/z | 757.648 | 9.04 | 5.66E-01 | 1.12 | short-day flies |
| 10.23_836.8051m/z | 836.805 | 10.23 | 5.69E-01 | 1.12 | short-day flies |
| 9.24_753.6724m/z | 753.672 | 9.24 | 5.70E-01 | 1.15 | long-day flies |
| 6.04_859.5345m/z | 859.535 | 6.04 | 5.70E-01 | 1.07 | long-day flies |
| 8.11_745.5628n | 746.570 | 8.11 | 5.72E-01 | 1.04 | short-day flies |
| 2.55_542.4271m/z | 542.427 | 2.55 | 5.73E-01 | 1.08 | long-day flies |
| 7.92_715.5807m/z | 715.581 | 7.92 | 5.75E-01 | 1.08 | long-day flies |
| 9.63_257.2472m/z | 257.247 | 9.63 | 5.75E-01 | 1.21 | long-day flies |
| 3.10_363.3115m/z | 363.311 | 3.10 | 5.76E-01 | 1.08 | long-day flies |
| 8.75_723.6238m/z | 723.624 | 8.75 | 5.77E-01 | 1.25 | long-day flies |
| 11.03_82.9915m/z | 82.992 | 11.03 | 5.77E-01 | 1.27 | short-day flies |
| 5.72_97.0655m/z | 97.066 | 5.72 | 5.77E-01 | 1.09 | short-day flies |
| 4.49_250.1791m/z | 250.179 | 4.49 | 5.78E-01 | 1.61 | short-day flies |
| 14.72_58.0668m/z | 58.067 | 14.72 | 5.78E-01 | 1.25 | long-day flies |
| 9.13_698.6305m/z | 698.631 | 9.13 | 5.78E-01 | 1.22 | long-day flies |
| 12.89_97.0680m/z | 97.068 | 12.89 | 5.79E-01 | 1.05 | long-day flies |
| 8.17_755.5858n | 756.593 | 8.17 | 5.79E-01 | 1.06 | short-day flies |
| 10.31_880.8357m/z | 880.836 | 10.31 | 5.79E-01 | 1.11 | short-day flies |
| 2.75_503.3257m/z | 503.326 | 2.75 | 5.81E-01 | 1.34 | long-day flies |
| 3.51_397.2022m/z | 397.202 | 3.51 | 5.82E-01 | 1.09 | short-day flies |
| 9.25_779.6883m/z | 779.688 | 9.25 | 5.82E-01 | 1.12 | long-day flies |
| 15.03_123.0815m/z | 123.082 | 15.03 | 5.82E-01 | 1.08 | short-day flies |
| 2.34_342.2649m/z | 342.265 | 2.34 | 5.82E-01 | 1.11 | long-day flies |
| 12.18_58.0665m/z | 58.067 | 12.18 | 5.82E-01 | 1.10 | long-day flies |
| 2.08_748.5440m/z | 748.544 | 2.08 | 5.83E-01 | 1.17 | long-day flies |
| 9.44_367.3959m/z | 367.396 | 9.44 | 5.84E-01 | 1.27 | long-day flies |
| 6.85_612.4851m/z | 612.485 | 6.85 | 5.86E-01 | 1.09 | short-day flies |
| 4.43_353.2668m/z | 353.267 | 4.43 | 5.86E-01 | 1.05 | long-day flies |
| 9.00_467.4091m/z | 467.409 | 9.00 | 5.87E-01 | 1.29 | long-day flies |
| 8.21_97.0656m/z | 97.066 | 8.21 | 5.88E-01 | 1.32 | long-day flies |
| 8.24_626.5367m/z | 626.537 | 8.24 | 5.88E-01 | 1.12 | long-day flies |
| 12.01_109.0662m/z | 109.066 | 12.01 | 5.91E-01 | 1.19 | short-day flies |
| 6.61_85.1020m/z | 85.102 | 6.61 | 5.93E-01 | 82.64 | long-day flies |
| 8.04_741.5554m/z | 741.555 | 8.04 | 5.93E-01 | 1.07 | short-day flies |
| 6.84_723.5893m/z | 723.589 | 6.84 | 5.96E-01 | 1.06 | long-day flies |
| 9.36_752.6780m/z | 752.678 | 9.36 | 5.96E-01 | 1.12 | long-day flies |
| 15.07_239.0498m/z | 239.050 | 15.07 | 5.97E-01 | 1.17 | long-day flies |
| 2.74_732.5495m/z | 732.549 | 2.74 | 5.99E-01 | 1.10 | short-day flies |
| 9.76_834.7565m/z | 834.757 | 9.76 | 5.99E-01 | 1.11 | short-day flies |
| 8.78_647.4575m/z | 647.457 | 8.78 | 6.03E-01 | 1.03 | long-day flies |
| 2.76_400.3059m/z | 400.306 | 2.76 | 6.03E-01 | 1.03 | long-day flies |
| 12.87_129.0564m/z | 129.056 | 12.87 | 6.05E-01 | 1.08 | long-day flies |
| 2.17_857.4665m/z | 857.467 | 2.17 | 6.06E-01 | 1.16 | long-day flies |
| 4.70_228.1976m/z | 228.198 | 4.70 | 6.07E-01 | 1.38 | short-day flies |
| 6.37_279.1603m/z | 279.160 | 6.37 | 6.08E-01 | 1.21 | long-day flies |
| 6.65_197.1182m/z | 197.118 | 6.65 | 6.08E-01 | 20.43 | long-day flies |
| 9.47_748.6575n | 766.691 | 9.47 | 6.10E-01 | 1.11 | long-day flies |
| 12.93_416.2163m/z | 416.216 | 12.93 | 6.11E-01 | 1.11 | short-day flies |
| 5.08_284.2955m/z | 284.295 | 5.08 | 6.12E-01 | 1.06 | short-day flies |
| 15.56_224.1295m/z | 224.129 | 15.56 | 6.13E-01 | 1.21 | short-day flies |
| 12.66_96.0817m/z | 96.082 | 12.66 | 6.16E-01 | 1.03 | long-day flies |
| 10.24_892.8308m/z | 892.831 | 10.24 | 6.17E-01 | 1.08 | long-day flies |
| 12.19_129.0562m/z | 129.056 | 12.19 | 6.19E-01 | 1.11 | long-day flies |
| 7.32_757.5623n | 758.570 | 7.32 | 6.20E-01 | 1.05 | short-day flies |
| 9.67_776.6894n | 794.723 | 9.67 | 6.20E-01 | 1.07 | long-day flies |
| 9.14_724.6466m/z | 724.647 | 9.14 | 6.21E-01 | 1.28 | long-day flies |
| 3.53_319.2847m/z | 319.285 | 3.53 | 6.23E-01 | 1.09 | short-day flies |
| 12.78_416.2157m/z | 416.216 | 12.78 | 6.23E-01 | 1.09 | short-day flies |
| 8.95_624.5697n | 647.560 | 8.95 | 6.26E-01 | 1.07 | short-day flies |
| 8.95_642.6036m/z | 642.604 | 8.95 | 6.27E-01 | 1.09 | short-day flies |
| 12.06_89.0611m/z | 89.061 | 12.06 | 6.28E-01 | 1.10 | short-day flies |
| 2.17_472.2913m/z | 472.291 | 2.17 | 6.29E-01 | 1.04 | short-day flies |
| 5.03_415.3420m/z | 415.342 | 5.03 | 6.29E-01 | 1.04 | short-day flies |
| 9.48_123.0807m/z | 123.081 | 9.48 | 6.30E-01 | 1.13 | long-day flies |
| 15.07_190.0129m/z | 190.013 | 15.07 | 6.30E-01 | 1.09 | short-day flies |
| 7.40_575.5027m/z | 575.503 | 7.40 | 6.30E-01 | 1.13 | long-day flies |
| 6.55_899.5114m/z | 899.511 | 6.55 | 6.30E-01 | 1.07 | long-day flies |
| 4.33_435.3644m/z | 435.364 | 4.33 | 6.32E-01 | 1.09 | long-day flies |
| 2.66_393.3219m/z | 393.322 | 2.66 | 6.32E-01 | 1.04 | long-day flies |
| 2.05_59.0617m/z | 59.062 | 2.05 | 6.34E-01 | 1.10 | long-day flies |
| 2.37_713.4233m/z | 713.423 | 2.37 | 6.34E-01 | 1.03 | long-day flies |
| 7.10_740.5231m/z | 740.523 | 7.10 | 6.34E-01 | 1.03 | short-day flies |
| 7.79_662.4470n | 663.453 | 7.79 | 6.35E-01 | 1.02 | short-day flies |
| 10.68_82.9901m/z | 82.990 | 10.68 | 6.36E-01 | 1.28 | short-day flies |
| 9.26_493.4245m/z | 493.424 | 9.26 | 6.36E-01 | 1.13 | long-day flies |
| 9.06_853.6855m/z | 853.685 | 9.06 | 6.36E-01 | 1.09 | short-day flies |
| 8.20_123.0813m/z | 123.081 | 8.20 | 6.37E-01 | 1.06 | long-day flies |
| 9.46_521.4559m/z | 521.456 | 9.46 | 6.38E-01 | 1.09 | long-day flies |
| 9.49_817.7168n | 818.724 | 9.49 | 6.39E-01 | 1.06 | long-day flies |
| 7.72_770.6122m/z | 770.612 | 7.72 | 6.41E-01 | 1.06 | short-day flies |
| 2.06_491.2335m/z | 491.233 | 2.06 | 6.42E-01 | 1.08 | long-day flies |
| 9.00_439.3774m/z | 439.377 | 9.00 | 6.42E-01 | 1.23 | long-day flies |
| 4.83_569.3266m/z | 569.327 | 4.83 | 6.42E-01 | 1.09 | short-day flies |
| 11.62_82.9908m/z | 82.991 | 11.62 | 6.42E-01 | 1.15 | long-day flies |
| 9.00_666.5790n | 684.613 | 9.00 | 6.44E-01 | 1.21 | long-day flies |
| 7.74_786.6016m/z | 786.602 | 7.74 | 6.44E-01 | 1.04 | short-day flies |
| 11.02_58.0676m/z | 58.068 | 11.02 | 6.45E-01 | 1.07 | long-day flies |
| 7.11_762.5055m/z | 762.506 | 7.11 | 6.47E-01 | 1.03 | short-day flies |
| 5.35_97.0657m/z | 97.066 | 5.35 | 6.48E-01 | 1.15 | short-day flies |
| 2.05_433.1792m/z | 433.179 | 2.05 | 6.49E-01 | 1.15 | short-day flies |
| 6.06_275.1656m/z | 275.166 | 6.06 | 6.50E-01 | 1.15 | long-day flies |
| 2.89_227.2020m/z | 227.202 | 2.89 | 6.51E-01 | 1.38 | short-day flies |
| 6.56_366.3735m/z | 366.373 | 6.56 | 6.53E-01 | 1.08 | short-day flies |
| 15.09_358.2355m/z | 358.235 | 15.09 | 6.54E-01 | 1.04 | long-day flies |
| 9.52_844.7410m/z | 844.741 | 9.52 | 6.54E-01 | 1.10 | long-day flies |
| 7.26_285.2445m/z | 285.245 | 7.26 | 6.54E-01 | 1.06 | short-day flies |
| 7.61_521.4565m/z | 521.457 | 7.61 | 6.55E-01 | 1.20 | long-day flies |
| 3.40_454.2939m/z | 454.294 | 3.40 | 6.55E-01 | 1.38 | short-day flies |
| 8.65_579.5343m/z | 579.534 | 8.65 | 6.55E-01 | 1.06 | short-day flies |
| 15.07_133.9834m/z | 133.983 | 15.07 | 6.57E-01 | 1.06 | long-day flies |
| 10.17_852.8035m/z | 852.804 | 10.17 | 6.59E-01 | 1.09 | short-day flies |
| 10.17_56.0516m/z | 56.052 | 10.17 | 6.60E-01 | 1.20 | long-day flies |
| 7.79_708.5094m/z | 708.509 | 7.79 | 6.60E-01 | 1.11 | short-day flies |
| 3.30_496.3423m/z | 496.342 | 3.30 | 6.61E-01 | 1.15 | long-day flies |
| 10.09_834.7937m/z | 834.794 | 10.09 | 6.62E-01 | 1.09 | long-day flies |
| 5.42_129.0553m/z | 129.055 | 5.42 | 6.62E-01 | 1.19 | long-day flies |
| 6.65_780.5551m/z | 780.555 | 6.65 | 6.62E-01 | 1.04 | short-day flies |
| 5.42_147.0663m/z | 147.066 | 5.42 | 6.62E-01 | 1.23 | long-day flies |
| 9.04_100.0758m/z | 100.076 | 9.04 | 6.63E-01 | 1.08 | long-day flies |
| 5.42_189.1136m/z | 189.114 | 5.42 | 6.63E-01 | 1.16 | long-day flies |
| 9.00_725.6412m/z | 725.641 | 9.00 | 6.64E-01 | 1.16 | long-day flies |
| 11.34_123.0816m/z | 123.082 | 11.34 | 6.65E-01 | 1.06 | long-day flies |
| 5.14_924.0695m/z | 924.070 | 5.14 | 6.66E-01 | 1.05 | long-day flies |
| 7.36_783.5785n | 784.586 | 7.36 | 6.66E-01 | 1.04 | short-day flies |
| 14.35_140.1075m/z | 140.108 | 14.35 | 6.67E-01 | 1.03 | short-day flies |
| 8.51_654.5666m/z | 654.567 | 8.51 | 6.68E-01 | 1.13 | long-day flies |
| 10.91_58.0670m/z | 58.067 | 10.91 | 6.68E-01 | 1.06 | long-day flies |
| 9.47_807.7211m/z | 807.721 | 9.47 | 6.69E-01 | 1.07 | long-day flies |
| 5.42_370.3090n | 371.316 | 5.42 | 6.72E-01 | 1.23 | long-day flies |
| 2.79_482.3747m/z | 482.375 | 2.79 | 6.72E-01 | 1.40 | short-day flies |
| 7.75_123.0815m/z | 123.081 | 7.75 | 6.72E-01 | 1.09 | short-day flies |
| 7.73_740.5207m/z | 740.521 | 7.73 | 6.73E-01 | 1.04 | short-day flies |
| 5.76_589.4066m/z | 589.407 | 5.76 | 6.74E-01 | 1.01 | short-day flies |
| 9.48_876.7778m/z | 876.778 | 9.48 | 6.75E-01 | 1.24 | long-day flies |
| 8.38_769.5875m/z | 769.588 | 8.38 | 6.75E-01 | 1.07 | long-day flies |
| 3.38_996.6053m/z | 996.605 | 3.38 | 6.75E-01 | 1.05 | long-day flies |
| 9.42_135.0817m/z | 135.082 | 9.42 | 6.76E-01 | 1.09 | short-day flies |
| 9.02_142.1233m/z | 142.123 | 9.02 | 6.77E-01 | 1.05 | short-day flies |
| 14.22_437.1968m/z | 437.197 | 14.22 | 6.78E-01 | 1.08 | short-day flies |
| 7.26_683.5102m/z | 683.510 | 7.26 | 6.78E-01 | 1.03 | long-day flies |
| 2.76_337.2742m/z | 337.274 | 2.76 | 6.79E-01 | 1.29 | long-day flies |
| 7.93_747.5890n | 770.572 | 7.93 | 6.79E-01 | 1.06 | short-day flies |
| 7.61_756.5497m/z | 756.550 | 7.61 | 6.80E-01 | 1.05 | long-day flies |
| 3.79_441.3211m/z | 441.321 | 3.79 | 6.80E-01 | 1.05 | long-day flies |
| 4.35_247.2424m/z | 247.242 | 4.35 | 6.81E-01 | 1.11 | long-day flies |
| 6.18_433.3322m/z | 433.332 | 6.18 | 6.81E-01 | 1.29 | long-day flies |
| 2.36_149.0243m/z | 149.024 | 2.36 | 6.82E-01 | 1.12 | short-day flies |
| 8.11_205.1237m/z | 205.124 | 8.11 | 6.82E-01 | 1.08 | long-day flies |
| 10.24_109.0679m/z | 109.068 | 10.24 | 6.83E-01 | 1.24 | short-day flies |
| 7.65_782.5676m/z | 782.568 | 7.65 | 6.84E-01 | 1.03 | long-day flies |
| 9.11_151.1004m/z | 151.100 | 9.11 | 6.84E-01 | 1.12 | short-day flies |
| 2.77_547.2724m/z | 547.272 | 2.77 | 6.90E-01 | 1.08 | long-day flies |
| 8.94_607.5656m/z | 607.566 | 8.94 | 6.90E-01 | 1.07 | short-day flies |
| 3.60_326.3787m/z | 326.379 | 3.60 | 6.91E-01 | 1.49 | long-day flies |
| 6.94_410.3998m/z | 410.400 | 6.94 | 6.95E-01 | 1.04 | short-day flies |
| 9.95_56.0506m/z | 56.051 | 9.95 | 6.96E-01 | 2.92 | short-day flies |
| 10.30_97.0656m/z | 97.066 | 10.30 | 6.97E-01 | 1.59 | long-day flies |
| 8.38_339.2912m/z | 339.291 | 8.38 | 6.97E-01 | 1.03 | long-day flies |
| 6.89_680.4660n | 698.500 | 6.89 | 6.98E-01 | 1.04 | long-day flies |
| 3.44_399.3106m/z | 399.311 | 3.44 | 6.99E-01 | 1.03 | short-day flies |
| 5.97_275.1657m/z | 275.166 | 5.97 | 6.99E-01 | 1.12 | long-day flies |
| 7.47_492.4421m/z | 492.442 | 7.47 | 6.99E-01 | 1.03 | short-day flies |
| 2.36_205.0881m/z | 205.088 | 2.36 | 7.01E-01 | 1.21 | long-day flies |
| 9.86_1055.9057m/z | 1055.906 | 9.86 | 7.03E-01 | 1.25 | long-day flies |
| 7.97_109.0650m/z | 109.065 | 7.97 | 7.03E-01 | 1.12 | short-day flies |
| 9.85_889.7996m/z | 889.800 | 9.85 | 7.04E-01 | 1.02 | short-day flies |
| 11.23_99.0824m/z | 99.082 | 11.23 | 7.04E-01 | 1.33 | short-day flies |
| 8.18_772.5877m/z | 772.588 | 8.18 | 7.05E-01 | 1.10 | long-day flies |
| 15.10_226.9898m/z | 226.990 | 15.10 | 7.05E-01 | 1.07 | long-day flies |
| 3.92_109.0657m/z | 109.066 | 3.92 | 7.06E-01 | 1.03 | short-day flies |
| 10.01_891.8172m/z | 891.817 | 10.01 | 7.06E-01 | 1.03 | short-day flies |
| 5.42_241.1810m/z | 241.181 | 5.42 | 7.06E-01 | 1.21 | long-day flies |
| 9.67_835.7527m/z | 835.753 | 9.67 | 7.07E-01 | 1.06 | long-day flies |
| 10.09_808.7762m/z | 808.776 | 10.09 | 7.07E-01 | 1.10 | long-day flies |
| 3.04_557.2942m/z | 557.294 | 3.04 | 7.08E-01 | 1.08 | short-day flies |
| 9.69_495.4390m/z | 495.439 | 9.69 | 7.09E-01 | 1.03 | long-day flies |
| 3.39_480.3096m/z | 480.310 | 3.39 | 7.09E-01 | 1.42 | long-day flies |
| 13.44_135.0815m/z | 135.082 | 13.44 | 7.10E-01 | 1.04 | long-day flies |
| 10.16_780.7802m/z | 780.780 | 10.16 | 7.11E-01 | 1.32 | short-day flies |
| 8.30_589.5314m/z | 589.531 | 8.30 | 7.13E-01 | 1.03 | short-day flies |
| 4.42_727.6004m/z | 727.600 | 4.42 | 7.13E-01 | 1.05 | long-day flies |
| 2.41_494.3240m/z | 494.324 | 2.41 | 7.14E-01 | 1.34 | long-day flies |
| 4.36_854.0001m/z | 854.000 | 4.36 | 7.15E-01 | 1.12 | short-day flies |
| 8.02_762.6017m/z | 762.602 | 8.02 | 7.15E-01 | 1.03 | long-day flies |
| 8.00_285.2453m/z | 285.245 | 8.00 | 7.17E-01 | 1.05 | long-day flies |
| 8.08_575.5107m/z | 575.511 | 8.08 | 7.17E-01 | 1.23 | short-day flies |
| 7.09_257.2127m/z | 257.213 | 7.09 | 7.19E-01 | 1.06 | long-day flies |
| 5.49_540.3279m/z | 540.328 | 5.49 | 7.22E-01 | 1.14 | long-day flies |
| 6.90_368.3905m/z | 368.391 | 6.90 | 7.22E-01 | 1.06 | short-day flies |
| 9.67_550.4966m/z | 550.497 | 9.67 | 7.22E-01 | 1.04 | short-day flies |
| 7.09_285.2439m/z | 285.244 | 7.09 | 7.22E-01 | 1.02 | short-day flies |
| 5.32_227.2008m/z | 227.201 | 5.32 | 7.23E-01 | 1.01 | short-day flies |
| 9.85_804.7205n | 822.754 | 9.85 | 7.24E-01 | 1.05 | long-day flies |
| 6.99_714.5075m/z | 714.508 | 6.99 | 7.24E-01 | 1.05 | long-day flies |
| 8.59_680.5824m/z | 680.582 | 8.59 | 7.25E-01 | 1.17 | long-day flies |
| 9.08_197.0825m/z | 197.082 | 9.08 | 7.26E-01 | 1.02 | long-day flies |
| 5.42_171.1027m/z | 171.103 | 5.42 | 7.26E-01 | 1.15 | long-day flies |
| 10.28_958.8859m/z | 958.886 | 10.28 | 7.29E-01 | 1.07 | short-day flies |
| 7.83_691.5767m/z | 691.577 | 7.83 | 7.33E-01 | 1.19 | short-day flies |
| 7.36_842.6410m/z | 842.641 | 7.36 | 7.33E-01 | 1.01 | long-day flies |
| 4.33_483.6400m/z | 483.640 | 4.33 | 7.34E-01 | 1.01 | short-day flies |
| 6.36_601.5191m/z | 601.519 | 6.36 | 7.35E-01 | 1.17 | long-day flies |
| 7.63_734.5699m/z | 734.570 | 7.63 | 7.36E-01 | 1.03 | long-day flies |
| 10.55_551.5050m/z | 551.505 | 10.55 | 7.36E-01 | 1.25 | long-day flies |
| 9.47_493.4246m/z | 493.425 | 9.47 | 7.37E-01 | 1.12 | long-day flies |
| 9.58_742.6648m/z | 742.665 | 9.58 | 7.38E-01 | 1.02 | short-day flies |
| 3.05_424.3643m/z | 424.364 | 3.05 | 7.40E-01 | 1.09 | short-day flies |
| 4.44_257.2487m/z | 257.249 | 4.44 | 7.40E-01 | 1.07 | short-day flies |
| 8.34_731.5833n | 732.591 | 8.34 | 7.41E-01 | 1.05 | short-day flies |
| 2.81_688.5226m/z | 688.523 | 2.81 | 7.41E-01 | 1.03 | short-day flies |
| 5.43_301.2390m/z | 301.239 | 5.43 | 7.41E-01 | 1.16 | long-day flies |
| 9.67_802.7048n | 820.739 | 9.67 | 7.44E-01 | 1.04 | long-day flies |
| 14.10_58.0654m/z | 58.065 | 14.10 | 7.44E-01 | 1.18 | long-day flies |
| 5.42_259.1917m/z | 259.192 | 5.42 | 7.44E-01 | 1.18 | long-day flies |
| 7.52_687.5448m/z | 687.545 | 7.52 | 7.50E-01 | 1.03 | short-day flies |
| 8.72_439.3778m/z | 439.378 | 8.72 | 7.51E-01 | 1.21 | long-day flies |
| 9.76_808.7404m/z | 808.740 | 9.76 | 7.54E-01 | 1.09 | short-day flies |
| 11.66_195.1250m/z | 195.125 | 11.66 | 7.54E-01 | 1.02 | short-day flies |
| 15.18_224.1296m/z | 224.130 | 15.18 | 7.56E-01 | 1.08 | short-day flies |
| 8.31_523.5056m/z | 523.506 | 8.31 | 7.57E-01 | 1.10 | long-day flies |
| 5.84_975.6718m/z | 975.672 | 5.84 | 7.57E-01 | 1.10 | long-day flies |
| 6.65_57.0710m/z | 57.071 | 6.65 | 7.60E-01 | 30.74 | long-day flies |
| 7.09_467.4097m/z | 467.410 | 7.09 | 7.60E-01 | 1.03 | short-day flies |
| 5.42_111.0446m/z | 111.045 | 5.42 | 7.61E-01 | 1.13 | long-day flies |
| 4.06_434.2483m/z | 434.248 | 4.06 | 7.61E-01 | 1.10 | long-day flies |
| 4.84_867.0534m/z | 867.053 | 4.84 | 7.62E-01 | 1.05 | long-day flies |
| 7.10_713.5002n | 714.508 | 7.10 | 7.65E-01 | 1.02 | short-day flies |
| 2.27_335.2793m/z | 335.279 | 2.27 | 7.67E-01 | 1.02 | short-day flies |
| 2.44_532.3854m/z | 532.385 | 2.44 | 7.67E-01 | 1.08 | long-day flies |
| 6.83_662.4760m/z | 662.476 | 6.83 | 7.69E-01 | 1.21 | short-day flies |
| 9.95_1055.9072m/z | 1055.907 | 9.95 | 7.71E-01 | 1.17 | short-day flies |
| 10.71_58.0657m/z | 58.066 | 10.71 | 7.75E-01 | 1.26 | long-day flies |
| 13.12_82.9896m/z | 82.990 | 13.12 | 7.80E-01 | 1.00 | long-day flies |
| 9.85_523.4702m/z | 523.470 | 9.85 | 7.80E-01 | 1.27 | long-day flies |
| 3.87_625.4467m/z | 625.447 | 3.87 | 7.81E-01 | 1.07 | short-day flies |
| 7.81_587.5381m/z | 587.538 | 7.81 | 7.81E-01 | 1.02 | long-day flies |
| 5.42_83.0502m/z | 83.050 | 5.42 | 7.82E-01 | 1.44 | long-day flies |
| 7.66_760.5851m/z | 760.585 | 7.66 | 7.82E-01 | 1.03 | short-day flies |
| 8.67_596.5379n | 614.572 | 8.67 | 7.83E-01 | 1.04 | short-day flies |
| 4.33_264.2454n | 282.280 | 4.33 | 7.83E-01 | 1.05 | long-day flies |
| 8.30_1078.9790m/z | 1078.979 | 8.30 | 7.84E-01 | 1.07 | short-day flies |
| 10.72_95.0859m/z | 95.086 | 10.72 | 7.85E-01 | 1.13 | long-day flies |
| 12.63_110.0971m/z | 110.097 | 12.63 | 7.85E-01 | 1.02 | short-day flies |
| 4.53_803.9923m/z | 803.992 | 4.53 | 7.86E-01 | 1.01 | short-day flies |
| 10.41_151.1015m/z | 151.101 | 10.41 | 7.86E-01 | 1.03 | long-day flies |
| 7.31_712.4888m/z | 712.489 | 7.31 | 7.86E-01 | 1.01 | long-day flies |
| 7.98_422.3992m/z | 422.399 | 7.98 | 7.88E-01 | 1.03 | short-day flies |
| 3.90_636.2982n | 637.305 | 3.90 | 7.90E-01 | 1.01 | short-day flies |
| 5.33_391.2859m/z | 391.286 | 5.33 | 7.91E-01 | 1.02 | long-day flies |
| 12.59_89.0610m/z | 89.061 | 12.59 | 7.94E-01 | 1.02 | long-day flies |
| 7.74_844.6496m/z | 844.650 | 7.74 | 7.95E-01 | 1.03 | short-day flies |
| 6.41_737.5050m/z | 737.505 | 6.41 | 7.95E-01 | 1.02 | short-day flies |
| 9.85_863.7836m/z | 863.784 | 9.85 | 7.96E-01 | 1.05 | long-day flies |
| 9.54_870.7576m/z | 870.758 | 9.54 | 7.96E-01 | 1.01 | short-day flies |
| 2.38_806.5867m/z | 806.587 | 2.38 | 7.97E-01 | 1.10 | long-day flies |
| 9.04_699.5985m/z | 699.599 | 9.04 | 7.98E-01 | 1.01 | long-day flies |
| 9.01_97.0662m/z | 97.066 | 9.01 | 7.99E-01 | 1.27 | short-day flies |
| 9.85_830.7365n | 848.770 | 9.85 | 8.01E-01 | 1.01 | short-day flies |
| 14.54_129.0556m/z | 129.056 | 14.54 | 8.02E-01 | 1.02 | long-day flies |
| 6.89_738.5192n | 756.555 | 6.89 | 8.05E-01 | 1.03 | short-day flies |
| 9.28_769.6329m/z | 769.633 | 9.28 | 8.06E-01 | 1.02 | short-day flies |
| 10.10_890.8216m/z | 890.822 | 10.10 | 8.07E-01 | 1.11 | short-day flies |
| 3.79_381.3001m/z | 381.300 | 3.79 | 8.07E-01 | 1.02 | short-day flies |
| 9.67_861.7682m/z | 861.768 | 9.67 | 8.08E-01 | 1.03 | long-day flies |
| 11.96_82.9910m/z | 82.991 | 11.96 | 8.09E-01 | 1.08 | long-day flies |
| 9.07_812.6589m/z | 812.659 | 9.07 | 8.13E-01 | 1.01 | short-day flies |
| 13.66_123.0820m/z | 123.082 | 13.66 | 8.14E-01 | 1.08 | long-day flies |
| 2.36_620.4396m/z | 620.440 | 2.36 | 8.15E-01 | 1.09 | long-day flies |
| 7.74_718.5382m/z | 718.538 | 7.74 | 8.16E-01 | 1.01 | short-day flies |
| 15.09_433.0093m/z | 433.009 | 15.09 | 8.17E-01 | 1.13 | short-day flies |
| 5.73_319.3360m/z | 319.336 | 5.73 | 8.20E-01 | 1.05 | long-day flies |
| 5.85_934.6436m/z | 934.644 | 5.85 | 8.22E-01 | 1.01 | short-day flies |
| 14.32_82.9903m/z | 82.990 | 14.32 | 8.22E-01 | 1.01 | short-day flies |
| 2.59_498.4007m/z | 498.401 | 2.59 | 8.24E-01 | 1.02 | short-day flies |
| 5.85_420.2790m/z | 420.279 | 5.85 | 8.24E-01 | 1.00 | long-day flies |
| 7.07_507.4020m/z | 507.402 | 7.07 | 8.24E-01 | 1.05 | long-day flies |
| 9.75_818.7263m/z | 818.726 | 9.75 | 8.24E-01 | 1.05 | short-day flies |
| 10.02_824.7717m/z | 824.772 | 10.02 | 8.25E-01 | 1.01 | long-day flies |
| 9.94_810.7564m/z | 810.756 | 9.94 | 8.26E-01 | 1.00 | short-day flies |
| 2.12_660.4905m/z | 660.490 | 2.12 | 8.26E-01 | 1.05 | long-day flies |
| 3.27_526.4277m/z | 526.428 | 3.27 | 8.29E-01 | 1.02 | long-day flies |
| 9.55_142.1243m/z | 142.124 | 9.55 | 8.31E-01 | 1.11 | long-day flies |
| 6.37_440.4098m/z | 440.410 | 6.37 | 8.32E-01 | 1.02 | long-day flies |
| 2.66_502.3178n | 520.340 | 2.66 | 8.32E-01 | 1.38 | long-day flies |
| 6.58_147.0672m/z | 147.067 | 6.58 | 8.33E-01 | 1.01 | short-day flies |
| 14.35_100.0767m/z | 100.077 | 14.35 | 8.36E-01 | 1.01 | short-day flies |
| 10.72_82.9897m/z | 82.990 | 10.72 | 8.39E-01 | 1.06 | short-day flies |
| 14.57_82.9914m/z | 82.991 | 14.57 | 8.39E-01 | 1.24 | short-day flies |
| 15.06_210.1239m/z | 210.124 | 15.06 | 8.40E-01 | 1.10 | short-day flies |
| 12.23_99.0809m/z | 99.081 | 12.23 | 8.40E-01 | 1.12 | long-day flies |
| 6.54_754.5389m/z | 754.539 | 6.54 | 8.41E-01 | 1.03 | short-day flies |
| 11.83_239.1502m/z | 239.150 | 11.83 | 8.43E-01 | 1.01 | long-day flies |
| 6.73_704.5224m/z | 704.522 | 6.73 | 8.44E-01 | 1.04 | long-day flies |
| 7.24_661.5279m/z | 661.528 | 7.24 | 8.45E-01 | 1.01 | long-day flies |
| 9.57_754.6946m/z | 754.695 | 9.57 | 8.45E-01 | 1.04 | long-day flies |
| 2.09_363.3109m/z | 363.311 | 2.09 | 8.48E-01 | 1.69 | long-day flies |
| 15.06_722.5108m/z | 722.511 | 15.06 | 8.49E-01 | 1.01 | short-day flies |
| 5.44_797.5331m/z | 797.533 | 5.44 | 8.50E-01 | 1.07 | short-day flies |
| 6.79_788.5551m/z | 788.555 | 6.79 | 8.51E-01 | 1.22 | long-day flies |
| 2.76_478.2941m/z | 478.294 | 2.76 | 8.52E-01 | 1.60 | long-day flies |
| 3.87_667.9460m/z | 667.946 | 3.87 | 8.57E-01 | 1.10 | long-day flies |
| 2.50_311.2587m/z | 311.259 | 2.50 | 8.57E-01 | 1.31 | long-day flies |
| 3.49_119.0867m/z | 119.087 | 3.49 | 8.58E-01 | 1.02 | long-day flies |
| 5.16_310.3110m/z | 310.311 | 5.16 | 8.58E-01 | 1.24 | short-day flies |
| 2.62_436.3404n | 454.374 | 2.62 | 8.58E-01 | 1.02 | long-day flies |
| 4.72_521.6513m/z | 521.651 | 4.72 | 8.59E-01 | 1.09 | short-day flies |
| 7.32_816.6245m/z | 816.624 | 7.32 | 8.60E-01 | 1.08 | short-day flies |
| 7.23_731.5466n | 732.554 | 7.23 | 8.63E-01 | 1.02 | short-day flies |
| 6.36_711.4953m/z | 711.495 | 6.36 | 8.64E-01 | 1.01 | long-day flies |
| 12.33_123.0812m/z | 123.081 | 12.33 | 8.65E-01 | 1.01 | long-day flies |
| 13.95_82.9903m/z | 82.990 | 13.95 | 8.66E-01 | 1.05 | long-day flies |
| 7.39_700.5375m/z | 700.538 | 7.39 | 8.66E-01 | 1.04 | short-day flies |
| 15.07_181.0257m/z | 181.026 | 15.07 | 8.68E-01 | 1.02 | long-day flies |
| 8.32_100.0771m/z | 100.077 | 8.32 | 8.70E-01 | 1.19 | long-day flies |
| 2.52_452.2768m/z | 452.277 | 2.52 | 8.72E-01 | 1.42 | long-day flies |
| 2.59_674.5049m/z | 674.505 | 2.59 | 8.72E-01 | 1.03 | long-day flies |
| 6.24_382.3654m/z | 382.365 | 6.24 | 8.74E-01 | 1.00 | short-day flies |
| 5.35_113.1331m/z | 113.133 | 5.35 | 8.75E-01 | 1.03 | short-day flies |
| 15.07_128.0827m/z | 128.083 | 15.07 | 8.76E-01 | 1.02 | short-day flies |
| 8.47_603.5351m/z | 603.535 | 8.47 | 8.76E-01 | 1.00 | long-day flies |
| 5.33_375.3259m/z | 375.326 | 5.33 | 8.77E-01 | 1.03 | short-day flies |
| 8.33_730.5322m/z | 730.532 | 8.33 | 8.78E-01 | 1.18 | long-day flies |
| 4.18_256.2643m/z | 256.264 | 4.18 | 8.79E-01 | 1.04 | long-day flies |
| 6.79_729.5318n | 730.539 | 6.79 | 8.83E-01 | 1.02 | short-day flies |
| 5.29_358.3092n | 381.298 | 5.29 | 8.83E-01 | 1.00 | long-day flies |
| 9.48_547.4715m/z | 547.472 | 9.48 | 8.84E-01 | 1.03 | short-day flies |
| 15.07_233.0562m/z | 233.056 | 15.07 | 8.85E-01 | 1.00 | long-day flies |
| 10.39_946.8846m/z | 946.885 | 10.39 | 8.85E-01 | 1.01 | long-day flies |
| 6.40_466.4266m/z | 466.427 | 6.40 | 8.85E-01 | 1.01 | long-day flies |
| 10.09_838.7891m/z | 838.789 | 10.09 | 8.85E-01 | 1.06 | short-day flies |
| 15.07_139.9987m/z | 139.999 | 15.07 | 8.86E-01 | 1.03 | short-day flies |
| 2.85_377.2893m/z | 377.289 | 2.85 | 8.86E-01 | 1.85 | short-day flies |
| 2.34_151.0984m/z | 151.098 | 2.34 | 8.87E-01 | 1.02 | long-day flies |
| 6.53_257.2129m/z | 257.213 | 6.53 | 8.88E-01 | 1.01 | long-day flies |
| 12.50_129.0574m/z | 129.057 | 12.50 | 8.88E-01 | 1.07 | long-day flies |
| 7.57_535.4322m/z | 535.432 | 7.57 | 8.89E-01 | 1.03 | long-day flies |
| 14.84_685.4351m/z | 685.435 | 14.84 | 8.89E-01 | 1.04 | short-day flies |
| 4.07_492.3012m/z | 492.301 | 4.07 | 8.90E-01 | 1.28 | long-day flies |
| 8.38_617.5119m/z | 617.512 | 8.38 | 8.91E-01 | 1.04 | long-day flies |
| 10.25_959.8871m/z | 959.887 | 10.25 | 8.92E-01 | 1.06 | short-day flies |
| 2.18_473.2822m/z | 473.282 | 2.18 | 8.92E-01 | 1.02 | short-day flies |
| 12.51_89.0614m/z | 89.061 | 12.51 | 8.94E-01 | 1.00 | long-day flies |
| 7.68_702.5419m/z | 702.542 | 7.68 | 8.95E-01 | 1.12 | long-day flies |
| 10.12_128.1102m/z | 128.110 | 10.12 | 8.96E-01 | 1.14 | long-day flies |
| 9.82_730.5877m/z | 730.588 | 9.82 | 8.97E-01 | 1.15 | long-day flies |
| 7.98_563.4669m/z | 563.467 | 7.98 | 8.99E-01 | 1.06 | short-day flies |
| 6.91_569.3320m/z | 569.332 | 6.91 | 9.02E-01 | 1.02 | long-day flies |
| 9.10_119.0865m/z | 119.087 | 9.10 | 9.03E-01 | 1.03 | short-day flies |
| 9.57_780.7090m/z | 780.709 | 9.57 | 9.03E-01 | 1.01 | long-day flies |
| 4.50_421.1945m/z | 421.195 | 4.50 | 9.04E-01 | 45.37 | long-day flies |
| 5.29_783.6649m/z | 783.665 | 5.29 | 9.05E-01 | 1.01 | short-day flies |
| 9.85_550.5001m/z | 550.500 | 9.85 | 9.05E-01 | 1.02 | long-day flies |
| 9.38_778.6900m/z | 778.690 | 9.38 | 9.05E-01 | 1.01 | long-day flies |
| 3.90_695.3595m/z | 695.360 | 3.90 | 9.07E-01 | 1.01 | long-day flies |
| 10.54_936.8985m/z | 936.898 | 10.54 | 9.09E-01 | 1.00 | short-day flies |
| 13.60_142.1239m/z | 142.124 | 13.60 | 9.10E-01 | 1.00 | short-day flies |
| 6.98_512.4657m/z | 512.466 | 6.98 | 9.10E-01 | 1.01 | short-day flies |
| 14.74_89.0600m/z | 89.060 | 14.74 | 9.11E-01 | 1.03 | short-day flies |
| 5.22_1008.1415m/z | 1008.142 | 5.22 | 9.12E-01 | 1.01 | short-day flies |
| 5.30_285.2800m/z | 285.280 | 5.30 | 9.12E-01 | 1.16 | long-day flies |
| 7.77_766.5355m/z | 766.535 | 7.77 | 9.13E-01 | 1.01 | long-day flies |
| 2.55_226.2169m/z | 226.217 | 2.55 | 9.14E-01 | 1.08 | long-day flies |
| 6.98_468.4401m/z | 468.440 | 6.98 | 9.14E-01 | 1.01 | long-day flies |
| 9.34_680.6939m/z | 680.694 | 9.34 | 9.18E-01 | 1.45 | short-day flies |
| 8.30_205.1234m/z | 205.123 | 8.30 | 9.19E-01 | 1.01 | short-day flies |
| 2.70_349.2958m/z | 349.296 | 2.70 | 9.20E-01 | 1.01 | short-day flies |
| 8.44_774.6023m/z | 774.602 | 8.44 | 9.21E-01 | 1.03 | short-day flies |
| 14.21_89.0616m/z | 89.062 | 14.21 | 9.21E-01 | 1.36 | short-day flies |
| 5.79_312.3257m/z | 312.326 | 5.79 | 9.21E-01 | 1.09 | long-day flies |
| 7.32_751.6206m/z | 751.621 | 7.32 | 9.26E-01 | 1.01 | short-day flies |
| 8.73_697.6091m/z | 697.609 | 8.73 | 9.28E-01 | 1.06 | long-day flies |
| 5.04_123.0809m/z | 123.081 | 5.04 | 9.29E-01 | 1.06 | short-day flies |
| 3.44_357.3008m/z | 357.301 | 3.44 | 9.32E-01 | 1.02 | short-day flies |
| 3.50_307.1204m/z | 307.120 | 3.50 | 9.32E-01 | 1.01 | long-day flies |
| 9.59_832.7430m/z | 832.743 | 9.59 | 9.33E-01 | 1.04 | short-day flies |
| 7.41_715.5155n | 716.523 | 7.41 | 9.36E-01 | 1.00 | short-day flies |
| 2.34_304.3015m/z | 304.302 | 2.34 | 9.38E-01 | 1.04 | long-day flies |
| 9.69_845.7485n | 846.756 | 9.69 | 9.39E-01 | 1.02 | long-day flies |
| 15.08_278.1108m/z | 278.111 | 15.08 | 9.40E-01 | 1.01 | short-day flies |
| 5.42_763.6088m/z | 763.609 | 5.42 | 9.41E-01 | 2.54 | long-day flies |
| 15.55_123.0793m/z | 123.079 | 15.55 | 9.41E-01 | 1.07 | short-day flies |
| 2.40_576.4114m/z | 576.411 | 2.40 | 9.42E-01 | 1.06 | long-day flies |
| 3.36_850.5450m/z | 850.545 | 3.36 | 9.42E-01 | 1.01 | short-day flies |
| 3.43_339.2902m/z | 339.290 | 3.43 | 9.43E-01 | 1.05 | long-day flies |
| 12.46_139.1200m/z | 139.120 | 12.46 | 9.45E-01 | 1.01 | long-day flies |
| 2.07_792.5734m/z | 792.573 | 2.07 | 9.45E-01 | 1.02 | long-day flies |
| 11.53_128.1086m/z | 128.109 | 11.53 | 9.46E-01 | 1.01 | short-day flies |
| 4.51_540.3646m/z | 540.365 | 4.51 | 9.47E-01 | 1.02 | long-day flies |
| 15.07_269.0004m/z | 269.000 | 15.07 | 9.47E-01 | 1.00 | short-day flies |
| 7.77_744.5542m/z | 744.554 | 7.77 | 9.49E-01 | 1.00 | short-day flies |
| 14.57_58.0669m/z | 58.067 | 14.57 | 9.49E-01 | 1.18 | long-day flies |
| 11.08_58.0670m/z | 58.067 | 11.08 | 9.49E-01 | 1.01 | long-day flies |
| 7.44_742.5387m/z | 742.539 | 7.44 | 9.49E-01 | 1.01 | short-day flies |
| 10.08_563.5244m/z | 563.524 | 10.08 | 9.51E-01 | 1.04 | short-day flies |
| 2.32_244.2650m/z | 244.265 | 2.32 | 9.51E-01 | 1.61 | long-day flies |
| 9.47_745.6321m/z | 745.632 | 9.47 | 9.52E-01 | 1.00 | short-day flies |
| 8.84_494.4926m/z | 494.493 | 8.84 | 9.53E-01 | 1.00 | long-day flies |
| 14.57_685.4353m/z | 685.435 | 14.57 | 9.53E-01 | 1.00 | long-day flies |
| 3.28_522.3570m/z | 522.357 | 3.28 | 9.53E-01 | 1.45 | long-day flies |
| 10.01_832.7527n | 850.787 | 10.01 | 9.53E-01 | 1.00 | long-day flies |
| 6.79_554.4419m/z | 554.442 | 6.79 | 9.54E-01 | 1.02 | long-day flies |
| 10.76_82.9904m/z | 82.990 | 10.76 | 9.54E-01 | 1.00 | short-day flies |
| 5.47_710.4378m/z | 710.438 | 5.47 | 9.55E-01 | 1.03 | long-day flies |
| 6.88_688.4921m/z | 688.492 | 6.88 | 9.58E-01 | 1.01 | long-day flies |
| 9.58_806.7256m/z | 806.726 | 9.58 | 9.59E-01 | 1.01 | short-day flies |
| 10.54_129.0551m/z | 129.055 | 10.54 | 9.59E-01 | 1.17 | long-day flies |
| 10.67_58.0657m/z | 58.066 | 10.67 | 9.59E-01 | 1.07 | long-day flies |
| 13.76_58.0659m/z | 58.066 | 13.76 | 9.62E-01 | 1.13 | short-day flies |
| 15.09_175.0268m/z | 175.027 | 15.09 | 9.64E-01 | 1.02 | short-day flies |
| 5.43_231.1606m/z | 231.161 | 5.43 | 9.65E-01 | 1.01 | long-day flies |
| 7.49_169.0855m/z | 169.086 | 7.49 | 9.65E-01 | 1.09 | long-day flies |
| 7.26_544.4575m/z | 544.458 | 7.26 | 9.67E-01 | 1.08 | short-day flies |
| 5.81_71.0868m/z | 71.087 | 5.81 | 9.68E-01 | 1.25 | long-day flies |
| 8.55_570.4456m/z | 570.446 | 8.55 | 9.68E-01 | 1.11 | long-day flies |
| 2.46_274.2751m/z | 274.275 | 2.46 | 9.68E-01 | 1.30 | short-day flies |
| 14.25_685.4360m/z | 685.436 | 14.25 | 9.70E-01 | 1.01 | short-day flies |
| 9.26_521.4549m/z | 521.455 | 9.26 | 9.78E-01 | 1.10 | long-day flies |
| 8.73_638.5484n | 656.582 | 8.73 | 9.80E-01 | 1.05 | long-day flies |
| 9.76_782.7261m/z | 782.726 | 9.76 | 9.82E-01 | 1.09 | short-day flies |
| 6.64_712.4929m/z | 712.493 | 6.64 | 9.84E-01 | 1.02 | short-day flies |
| 12.11_58.0667m/z | 58.067 | 12.11 | 9.84E-01 | 1.09 | long-day flies |
| 2.96_59.0626m/z | 59.063 | 2.96 | 9.85E-01 | 1.12 | long-day flies |
| 5.32_95.0866m/z | 95.087 | 5.32 | 9.87E-01 | 1.11 | long-day flies |
| 7.49_107.0493m/z | 107.049 | 7.49 | 9.88E-01 | 1.00 | long-day flies |
| 9.67_521.4569m/z | 521.457 | 9.67 | 9.90E-01 | 1.01 | long-day flies |
| 8.52_628.3758m/z | 628.376 | 8.52 | 9.90E-01 | 1.07 | long-day flies |
| 10.63_416.2154m/z | 416.215 | 10.63 | 9.90E-01 | 1.02 | long-day flies |
| 10.86_82.9897m/z | 82.990 | 10.86 | 9.92E-01 | 1.01 | long-day flies |
| 7.35_682.5582m/z | 682.558 | 7.35 | 9.93E-01 | 1.07 | long-day flies |
| 3.01_398.2317m/z | 398.232 | 3.01 | 9.93E-01 | 13.08 | short-day flies |
| 3.89_668.4473m/z | 668.447 | 3.89 | 9.94E-01 | 1.00 | short-day flies |
| 12.38_58.0665m/z | 58.067 | 12.38 | 9.94E-01 | 1.05 | short-day flies |
| 3.50_589.3280m/z | 589.328 | 3.50 | 9.94E-01 | 1.00 | long-day flies |
| 13.85_723.5152m/z | 723.515 | 13.85 | 9.95E-01 | 1.01 | short-day flies |
| 7.02_840.6243m/z | 840.624 | 7.02 | 9.97E-01 | 1.16 | short-day flies |
| 7.64_547.4723m/z | 547.472 | 7.64 | 9.97E-01 | 1.00 | short-day flies |
| 7.57_285.2437m/z | 285.244 | 7.57 | 9.98E-01 | 1.01 | long-day flies |
| 8.07_729.5679n | 730.575 | 8.07 | 9.99E-01 | 1.00 | short-day flies |
| 8.40_758.6078m/z | 758.608 | 8.40 | 9.99E-01 | 1.01 | long-day flies |

**Table S3**

Annotated lipid features in the brains of Canton-S flies that were reared under short-day and long-day conditions. Each lipid feature ID is defined by its retention time and mass-to-charge ratio. ANOVA p-values were calculated to highlight significant differences (p ≤ 0.05) between short-day and long-day flies, and these are shown in green. Fold changes were calculated by dividing the average values from the six replicates, and these values are shown in the heat map (the highest value is highlighted in red, and the lowest in white). The highest mean indicates the group with the highest averaged peak areas.

| Compound ID | m/z | Retention time (min) | Anova (p) | Max Fold Change | Highest Mean |
| --- | --- | --- | --- | --- | --- |
| 2.31_972.6489m/z+ | 972.649 | 2.31 | 9.3E-09 | Infinity | short-day flies |
| 7.31_762.5065m/z+ | 762.506 | 7.31 | 1.7E-05 | 1.40 | short-day flies |
| 3.52_498.8012m/z+ | 498.801 | 3.52 | 2.8E-05 | 1.25 | long-day flies |
| 9.10_855.7016m/z+ | 855.702 | 9.10 | 2.9E-05 | 5.51 | short-day flies |
| 7.57_716.5230m/z+ | 716.523 | 7.57 | 4.3E-05 | 1.39 | short-day flies |
| 7.40_393.3733m/z- | 393.373 | 7.40 | 4.5E-05 | 6.04 | short-day flies |
| 7.35_738.5079m/z- | 738.508 | 7.35 | 1.2E-04 | 1.37 | short-day flies |
| 2.69_441.3336m/z+ | 441.334 | 2.69 | 1.2E-04 | 3.14 | short-day flies |
| 7.62_714.5079m/z- | 714.508 | 7.62 | 1.3E-04 | 1.41 | short-day flies |
| 7.08_688.4943m/z+ | 688.494 | 7.08 | 1.5E-04 | 2.00 | short-day flies |
| 7.30_740.5231m/z+ | 740.523 | 7.30 | 1.6E-04 | 1.37 | short-day flies |
| 6.81_712.4910m/z+ | 712.491 | 6.81 | 1.7E-04 | 1.63 | short-day flies |
| 7.32_712.4921m/z- | 712.492 | 7.32 | 2.0E-04 | 1.35 | short-day flies |
| 4.30_640.3893m/z+ | 640.389 | 4.30 | 2.1E-04 | 1.19 | long-day flies |
| 2.39_840.5688m/z+ | 840.569 | 2.39 | 2.1E-04 | 7.94 | short-day flies |
| 7.39_732.5541m/z+ | 732.554 | 7.39 | 2.3E-04 | 1.62 | short-day flies |
| 7.90_718.5387m/z+ | 718.539 | 7.90 | 2.3E-04 | 1.27 | short-day flies |
| 7.94_716.5232m/z- | 716.523 | 7.94 | 2.4E-04 | 1.26 | short-day flies |
| 7.27_714.5073m/z+ | 714.507 | 7.27 | 2.4E-04 | 1.33 | short-day flies |
| 7.56_700.5284m/z+ | 700.528 | 7.56 | 2.7E-04 | 1.34 | short-day flies |
| 3.97_381.3001m/z+ | 381.300 | 3.97 | 2.7E-04 | 1.23 | long-day flies |
| 2.50_713.4225m/z+ | 713.423 | 2.50 | 2.8E-04 | 1.23 | long-day flies |
| 6.96_730.5387m/z+ | 730.539 | 6.96 | 3.1E-04 | 2.43 | short-day flies |
| 2.43_752.5163m/z+ | 752.516 | 2.43 | 3.1E-04 | 5.38 | short-day flies |
| 6.90_838.5603m/z- | 838.560 | 6.90 | 3.1E-04 | 2.00 | short-day flies |
| 2.48_664.4634m/z+ | 664.463 | 2.48 | 3.2E-04 | 4.58 | short-day flies |
| 8.02_742.5389m/z- | 742.539 | 8.02 | 3.2E-04 | 1.18 | short-day flies |
| 2.52_620.4371m/z+ | 620.437 | 2.52 | 3.2E-04 | 4.31 | short-day flies |
| 2.72_227.1291m/z+ | 227.129 | 2.72 | 3.3E-04 | 2.32 | short-day flies |
| 2.46_708.4897m/z+ | 708.490 | 2.46 | 3.3E-04 | 4.94 | short-day flies |
| 2.41_796.5423m/z+ | 796.542 | 2.41 | 3.4E-04 | 5.91 | short-day flies |
| 2.36_884.5955m/z+ | 884.596 | 2.36 | 3.8E-04 | 10.17 | short-day flies |
| 3.52_499.3027m/z+ | 499.303 | 3.52 | 3.8E-04 | 1.24 | long-day flies |
| 3.79_583.8754m/z+ | 583.875 | 3.79 | 3.9E-04 | 1.21 | long-day flies |
| 2.55_558.3751n+ | 576.411 | 2.55 | 4.1E-04 | 3.93 | short-day flies |
| 6.99_736.4920m/z- | 736.492 | 6.99 | 4.3E-04 | 1.61 | short-day flies |
| 6.94_738.5071m/z+ | 738.507 | 6.94 | 4.6E-04 | 1.53 | short-day flies |
| 8.37_770.5701m/z- | 770.570 | 8.37 | 4.6E-04 | 2.04 | short-day flies |
| 2.65_485.3594m/z+ | 485.359 | 2.65 | 4.7E-04 | 2.63 | short-day flies |
| 7.77_734.5696m/z+ | 734.570 | 7.77 | 5.1E-04 | 1.59 | short-day flies |
| 7.34_706.5362m/z+ | 706.536 | 7.34 | 5.1E-04 | 2.00 | short-day flies |
| 7.80_760.5855m/z+ | 760.586 | 7.80 | 5.5E-04 | 1.41 | short-day flies |
| 2.58_514.3506n+ | 532.385 | 2.58 | 5.7E-04 | 3.51 | short-day flies |
| 2.64_315.1819m/z+ | 315.182 | 2.64 | 5.7E-04 | 3.37 | short-day flies |
| 3.53_996.6021m/z+ | 996.602 | 3.53 | 6.4E-04 | 1.21 | long-day flies |
| 7.29_798.5723m/z+ | 798.572 | 7.29 | 6.5E-04 | 1.88 | short-day flies |
| 2.30_472.2908m/z+ | 472.291 | 2.30 | 7.3E-04 | 1.20 | long-day flies |
| 7.36_820.5123m/z- | 820.512 | 7.36 | 7.7E-04 | 1.39 | short-day flies |
| 7.98_744.5544m/z+ | 744.554 | 7.98 | 7.8E-04 | 1.17 | short-day flies |
| 7.86_818.5913m/z- | 818.591 | 7.86 | 8.3E-04 | 1.32 | short-day flies |
| 2.61_470.3247n+ | 488.359 | 2.61 | 8.4E-04 | 3.01 | short-day flies |
| 1.49_430.2442m/z+ | 430.244 | 1.49 | 8.6E-04 | 1.18 | long-day flies |
| 3.45_755.4700m/z+ | 755.470 | 3.45 | 8.6E-04 | 1.77 | long-day flies |
| 2.69_382.2731n+ | 383.280 | 2.69 | 8.8E-04 | 2.32 | short-day flies |
| 1.20_555.3649m/z+ | 555.365 | 1.20 | 9.8E-04 | 1.29 | long-day flies |
| 7.48_758.5700m/z+ | 758.570 | 7.48 | 1.0E-03 | 1.46 | short-day flies |
| 7.23_659.5128m/z+ | 659.513 | 7.23 | 1.1E-03 | 1.62 | short-day flies |
| 7.44_790.5605m/z- | 790.560 | 7.44 | 1.1E-03 | 1.90 | short-day flies |
| 6.59_736.4915m/z+ | 736.491 | 6.59 | 1.1E-03 | 1.81 | short-day flies |
| 3.79_583.3739m/z+ | 583.374 | 3.79 | 1.1E-03 | 1.18 | long-day flies |
| 2.65_426.2985n+ | 444.332 | 2.65 | 1.2E-03 | 2.58 | short-day flies |
| 7.38_587.5384m/z+ | 587.538 | 7.38 | 1.2E-03 | 1.54 | long-day flies |
| 4.47_724.9621m/z+ | 724.962 | 4.47 | 1.2E-03 | 1.20 | long-day flies |
| 7.17_778.5350m/z+ | 778.535 | 7.17 | 1.3E-03 | 1.78 | short-day flies |
| 4.47_725.4650m/z+ | 725.465 | 4.47 | 1.4E-03 | 1.16 | long-day flies |
| 9.64_844.7395m/z+ | 844.739 | 9.64 | 1.4E-03 | 1.79 | short-day flies |
| 6.95_760.4939m/z+ | 760.494 | 6.95 | 1.4E-03 | 1.51 | short-day flies |
| 2.69_271.1553m/z+ | 271.155 | 2.69 | 1.4E-03 | 2.36 | short-day flies |
| 7.17_756.5541m/z+ | 756.554 | 7.17 | 1.5E-03 | 1.47 | short-day flies |
| 2.33_928.6226m/z+ | 928.623 | 2.33 | 1.5E-03 | 16.68 | short-day flies |
| 2.38_342.2646m/z+ | 342.265 | 2.38 | 1.5E-03 | 1.25 | long-day flies |
| 7.52_806.5678m/z+ | 806.568 | 7.52 | 1.6E-03 | 1.34 | short-day flies |
| 8.27_746.5697m/z+ | 746.570 | 8.27 | 1.7E-03 | 1.21 | short-day flies |
| 1.79_599.3908m/z+ | 599.391 | 1.79 | 1.8E-03 | 1.19 | long-day flies |
| 5.18_729.6249m/z- | 729.625 | 5.18 | 1.9E-03 | 1.40 | long-day flies |
| 7.40_644.4919m/z+ | 644.492 | 7.40 | 1.9E-03 | 1.22 | long-day flies |
| 7.60_800.5833n+ | 842.639 | 7.60 | 2.1E-03 | 2.69 | short-day flies |
| 7.53_816.5761m/z- | 816.576 | 7.53 | 2.1E-03 | 1.45 | short-day flies |
| 7.62_796.5108m/z- | 796.511 | 7.62 | 2.1E-03 | 2.10 | short-day flies |
| 7.56_924.5961m/z- | 924.596 | 7.56 | 2.3E-03 | 2.64 | short-day flies |
| 4.57_482.3264m/z+ | 482.326 | 4.57 | 2.4E-03 | 1.37 | short-day flies |
| 7.74_685.5283m/z- | 685.528 | 7.74 | 2.4E-03 | 1.56 | short-day flies |
| 7.29_657.4972m/z- | 657.497 | 7.29 | 2.6E-03 | 1.69 | short-day flies |
| 6.72_754.5377m/z+ | 754.538 | 6.72 | 2.7E-03 | 1.82 | short-day flies |
| 7.80_818.6389m/z+ | 818.639 | 7.80 | 2.8E-03 | 2.67 | short-day flies |
| 7.89_844.6544m/z+ | 844.654 | 7.89 | 2.8E-03 | 2.47 | short-day flies |
| 7.22_814.5602m/z- | 814.560 | 7.22 | 2.8E-03 | 1.68 | short-day flies |
| 7.52_784.5855m/z+ | 784.586 | 7.52 | 2.9E-03 | 1.36 | short-day flies |
| 7.20_782.5701m/z+ | 782.570 | 7.20 | 3.0E-03 | 1.38 | short-day flies |
| 1.08_316.2130m/z+ | 316.213 | 1.08 | 3.0E-03 | 1.12 | long-day flies |
| 3.62_356.2936n+ | 357.300 | 3.62 | 3.1E-03 | 1.23 | long-day flies |
| 1.17_460.2547m/z+ | 460.255 | 1.17 | 3.1E-03 | 1.17 | long-day flies |
| 4.97_867.0526m/z+ | 867.053 | 4.97 | 3.3E-03 | 1.17 | long-day flies |
| 5.84_427.2519m/z+ | 427.252 | 5.84 | 3.4E-03 | 1.25 | long-day flies |
| 2.86_882.5705m/z+ | 882.570 | 2.86 | 3.6E-03 | 1.23 | long-day flies |
| 7.48_1041.5926m/z+ | 1041.593 | 7.48 | 3.6E-03 | 1.92 | long-day flies |
| 7.47_780.5515m/z+ | 780.552 | 7.47 | 3.6E-03 | 1.49 | short-day flies |
| 8.23_846.6230m/z- | 846.623 | 8.23 | 3.7E-03 | 1.35 | short-day flies |
| 8.93_664.4620n+ | 647.459 | 8.93 | 3.7E-03 | 1.17 | long-day flies |
| 7.89_740.5188m/z+ | 740.519 | 7.89 | 3.8E-03 | 1.20 | short-day flies |
| 9.80_845.7478n+ | 846.755 | 9.80 | 3.9E-03 | 1.48 | short-day flies |
| 7.52_842.6397m/z+ | 842.640 | 7.52 | 4.0E-03 | 2.54 | short-day flies |
| 6.81_339.3261m/z- | 339.326 | 6.81 | 4.0E-03 | 1.53 | short-day flies |
| 7.47_659.5134m/z- | 659.513 | 7.47 | 4.2E-03 | 1.24 | short-day flies |
| 7.90_700.5265m/z- | 700.527 | 7.90 | 4.2E-03 | 1.63 | short-day flies |
| 8.31_826.5559m/z- | 826.556 | 8.31 | 4.2E-03 | 1.33 | short-day flies |
| 7.57_842.5915m/z- | 842.592 | 7.57 | 4.2E-03 | 1.33 | short-day flies |
| 7.94_844.6074m/z- | 844.607 | 7.94 | 4.3E-03 | 1.28 | short-day flies |
| 8.23_717.5903m/z+ | 717.590 | 8.23 | 4.4E-03 | 1.30 | short-day flies |
| 7.86_900.5950m/z- | 900.595 | 7.86 | 4.5E-03 | 2.09 | short-day flies |
| 5.91_443.2467m/z- | 443.247 | 5.91 | 4.5E-03 | 1.22 | long-day flies |
| 7.42_661.5278m/z+ | 661.528 | 7.42 | 4.6E-03 | 1.23 | short-day flies |
| 7.90_786.6015m/z+ | 786.601 | 7.90 | 4.7E-03 | 1.31 | short-day flies |
| 8.31_744.5545m/z- | 744.554 | 8.31 | 4.8E-03 | 1.19 | short-day flies |
| 7.93_663.6066m/z+ | 663.607 | 7.93 | 4.9E-03 | 1.60 | long-day flies |
| 6.63_734.4755m/z- | 734.475 | 6.63 | 5.1E-03 | 2.76 | short-day flies |
| 4.29_640.8909m/z+ | 640.891 | 4.29 | 5.2E-03 | 1.17 | long-day flies |
| 7.49_816.6224m/z+ | 816.622 | 7.49 | 5.2E-03 | 2.66 | short-day flies |
| 7.94_607.3863m/z+ | 607.386 | 7.94 | 5.3E-03 | 1.19 | long-day flies |
| 9.48_857.7321m/z+ | 857.732 | 9.48 | 5.4E-03 | 1.60 | short-day flies |
| 9.22_762.6600m/z+ | 762.660 | 9.22 | 5.4E-03 | 1.96 | short-day flies |
| 8.18_788.6173m/z+ | 788.617 | 8.18 | 5.6E-03 | 1.33 | short-day flies |
| 9.83_897.7790n+ | 898.786 | 9.83 | 5.7E-03 | 1.82 | short-day flies |
| 7.80_782.5669m/z+ | 782.567 | 7.80 | 5.8E-03 | 1.44 | short-day flies |
| 7.75_822.5270m/z- | 822.527 | 7.75 | 5.8E-03 | 1.08 | short-day flies |
| 7.76_740.5237m/z- | 740.524 | 7.76 | 5.8E-03 | 1.16 | short-day flies |
| 3.97_441.3213m/z+ | 441.321 | 3.97 | 6.1E-03 | 1.22 | long-day flies |
| 7.09_635.5126m/z+ | 635.513 | 7.09 | 6.1E-03 | 1.66 | short-day flies |
| 7.20_840.6246m/z+ | 840.625 | 7.20 | 6.2E-03 | 2.47 | short-day flies |
| 8.15_762.6009m/z+ | 762.601 | 8.15 | 6.4E-03 | 1.42 | short-day flies |
| 7.54_688.4922m/z- | 688.492 | 7.54 | 6.6E-03 | 1.55 | short-day flies |
| 4.21_337.2361m/z- | 337.236 | 4.21 | 6.7E-03 | 1.22 | long-day flies |
| 5.12_381.2795m/z- | 381.280 | 5.12 | 6.8E-03 | 1.31 | long-day flies |
| 7.61_698.5126m/z- | 698.513 | 7.61 | 6.8E-03 | 1.30 | short-day flies |
| 7.93_662.4468n+ | 663.454 | 7.93 | 6.9E-03 | 1.15 | long-day flies |
| 5.19_589.5176m/z- | 589.518 | 5.19 | 7.0E-03 | 1.49 | long-day flies |
| 7.48_690.5073m/z+ | 690.507 | 7.48 | 7.2E-03 | 1.60 | short-day flies |
| 8.77_338.3425m/z+ | 338.342 | 8.77 | 7.2E-03 | 1.26 | long-day flies |
| 8.17_810.5986m/z+ | 810.599 | 8.17 | 7.4E-03 | 1.48 | short-day flies |
| 3.06_277.2166m/z- | 277.217 | 3.06 | 7.8E-03 | 1.29 | short-day flies |
| 9.13_689.5681m/z+ | 689.568 | 9.13 | 8.0E-03 | 1.61 | short-day flies |
| 8.28_715.5757m/z- | 715.576 | 8.28 | 8.1E-03 | 1.27 | short-day flies |
| 6.96_631.4820m/z- | 631.482 | 6.96 | 8.4E-03 | 1.44 | short-day flies |
| 7.71_742.5390m/z+ | 742.539 | 7.71 | 8.6E-03 | 1.17 | short-day flies |
| 7.54_898.5797m/z- | 898.580 | 7.54 | 8.9E-03 | 2.69 | short-day flies |
| 7.40_586.4386m/z+ | 586.439 | 7.40 | 8.9E-03 | 1.25 | long-day flies |
| 2.86_441.7854m/z+ | 441.785 | 2.86 | 9.0E-03 | 1.19 | long-day flies |
| 8.01_726.5440m/z- | 726.544 | 8.01 | 9.0E-03 | 1.13 | short-day flies |
| 4.21_255.2326m/z- | 255.233 | 4.21 | 9.4E-03 | 1.18 | long-day flies |
| 6.18_735.4946m/z+ | 735.495 | 6.18 | 9.5E-03 | 1.23 | long-day flies |
| 6.90_633.4967m/z+ | 633.497 | 6.90 | 9.6E-03 | 1.31 | short-day flies |
| 1.27_279.0945m/z+ | 279.094 | 1.27 | 9.6E-03 | 1.13 | long-day flies |
| 3.63_399.3105m/z+ | 399.311 | 3.63 | 9.7E-03 | 1.24 | long-day flies |
| 7.94_798.5256m/z- | 798.526 | 7.94 | 1.0E-02 | 1.24 | short-day flies |
| 7.25_840.5759m/z- | 840.576 | 7.25 | 1.0E-02 | 1.39 | short-day flies |
| 9.65_885.7659m/z+ | 885.766 | 9.65 | 1.0E-02 | 1.45 | short-day flies |
| 9.98_873.7789n+ | 874.786 | 9.98 | 1.0E-02 | 1.87 | short-day flies |
| 6.83_780.5542m/z+ | 780.554 | 6.83 | 1.0E-02 | 1.37 | short-day flies |
| 5.17_365.2674m/z- | 365.267 | 5.17 | 1.1E-02 | 1.18 | long-day flies |
| 7.73_764.5200m/z+ | 764.520 | 7.73 | 1.1E-02 | 1.05 | short-day flies |
| 7.61_661.5291m/z- | 661.529 | 7.61 | 1.1E-02 | 1.35 | short-day flies |
| 4.98_866.5514m/z+ | 866.551 | 4.98 | 1.1E-02 | 1.19 | long-day flies |
| 7.69_687.5433m/z+ | 687.543 | 7.69 | 1.1E-02 | 1.52 | short-day flies |
| 2.71_356.2807m/z+ | 356.281 | 2.71 | 1.1E-02 | 3.07 | short-day flies |
| 2.16_433.1782m/z+ | 433.178 | 2.16 | 1.1E-02 | 1.21 | long-day flies |
| 5.26_923.5680m/z+ | 923.568 | 5.26 | 1.2E-02 | 1.23 | long-day flies |
| 9.84_872.7706m/z+ | 872.771 | 9.84 | 1.2E-02 | 1.72 | short-day flies |
| 7.93_685.4357m/z+ | 685.436 | 7.93 | 1.2E-02 | 1.19 | long-day flies |
| 7.27_759.6158m/z- | 759.616 | 7.27 | 1.2E-02 | 1.66 | short-day flies |
| 8.22_820.6168m/z- | 820.617 | 8.22 | 1.2E-02 | 1.37 | short-day flies |
| 9.13_683.6066n+ | 684.614 | 9.13 | 1.3E-02 | 1.36 | short-day flies |
| 9.19_853.6844m/z+ | 853.684 | 9.19 | 1.3E-02 | 1.44 | short-day flies |
| 7.10_427.2518m/z+ | 427.252 | 7.10 | 1.4E-02 | 1.23 | long-day flies |
| 6.96_524.3311m/z+ | 524.331 | 6.96 | 1.4E-02 | 1.18 | long-day flies |
| 3.18_341.2689m/z- | 341.269 | 3.18 | 1.4E-02 | 1.36 | long-day flies |
| 2.64_449.2880m/z+ | 449.288 | 2.64 | 1.4E-02 | 2.87 | short-day flies |
| 1.55_851.4008m/z+ | 851.401 | 1.55 | 1.4E-02 | 2.76 | long-day flies |
| 1.38_574.2860m/z+ | 574.286 | 1.38 | 1.4E-02 | 1.20 | long-day flies |
| 4.85_781.9780m/z+ | 781.978 | 4.85 | 1.4E-02 | 1.22 | long-day flies |
| 7.83_792.5757m/z- | 792.576 | 7.83 | 1.5E-02 | 1.66 | short-day flies |
| 6.48_778.5389m/z+ | 778.539 | 6.48 | 1.5E-02 | 1.64 | short-day flies |
| 1.58_473.2172m/z- | 473.217 | 1.58 | 1.5E-02 | 2.07 | long-day flies |
| 9.00_891.6767m/z- | 891.677 | 9.00 | 1.6E-02 | 1.22 | long-day flies |
| 3.76_570.4557m/z+ | 570.456 | 3.76 | 1.6E-02 | 1.24 | long-day flies |
| 2.05_221.1185m/z+ | 221.119 | 2.05 | 1.6E-02 | 1.22 | long-day flies |
| 7.85_689.5594m/z+ | 689.559 | 7.85 | 1.6E-02 | 1.15 | short-day flies |
| 1.58_60.0202n- | 59.013 | 1.58 | 1.6E-02 | 1.41 | long-day flies |
| 5.12_59.0129m/z- | 59.013 | 5.12 | 1.7E-02 | 1.16 | long-day flies |
| 8.03_689.5589m/z- | 689.559 | 8.03 | 1.8E-02 | 1.31 | short-day flies |
| 6.89_704.5231m/z+ | 704.523 | 6.89 | 1.8E-02 | 2.58 | short-day flies |
| 1.55_453.1696m/z+ | 453.170 | 1.55 | 1.8E-02 | 1.50 | long-day flies |
| 9.96_847.7636n+ | 848.771 | 9.96 | 1.8E-02 | 1.34 | short-day flies |
| 13.78_654.3596m/z+ | 654.360 | 13.78 | 1.8E-02 | 1.25 | short-day flies |
| 8.15_740.5236m/z- | 740.524 | 8.15 | 1.9E-02 | 1.78 | short-day flies |
| 3.25_301.1653m/z- | 301.165 | 3.25 | 1.9E-02 | 1.16 | long-day flies |
| 7.39_790.5941m/z+ | 790.594 | 7.39 | 1.9E-02 | 2.09 | short-day flies |
| 7.18_814.6064m/z+ | 814.606 | 7.18 | 2.0E-02 | 2.37 | short-day flies |
| 9.43_789.6852n+ | 790.693 | 9.43 | 2.0E-02 | 1.54 | short-day flies |
| 3.98_517.3841m/z+ | 517.384 | 3.98 | 2.0E-02 | 1.20 | long-day flies |
| 2.87_442.2877m/z+ | 442.288 | 2.87 | 2.0E-02 | 1.28 | long-day flies |
| 7.90_687.5445m/z- | 687.544 | 7.90 | 2.0E-02 | 1.15 | short-day flies |
| 2.01_210.0885m/z+ | 210.088 | 2.01 | 2.0E-02 | 1.25 | long-day flies |
| 9.39_769.6296m/z+ | 769.630 | 9.39 | 2.1E-02 | 1.65 | short-day flies |
| 1.55_437.1937m/z+ | 437.194 | 1.55 | 2.1E-02 | 1.47 | long-day flies |
| 9.15_709.6222n+ | 710.629 | 9.15 | 2.1E-02 | 1.43 | short-day flies |
| 9.68_870.7533m/z+ | 870.753 | 9.68 | 2.1E-02 | 1.75 | short-day flies |
| 7.94_721.5074m/z+ | 721.507 | 7.94 | 2.2E-02 | 1.05 | long-day flies |
| 1.55_119.0865m/z+ | 119.087 | 1.55 | 2.2E-02 | 1.47 | long-day flies |
| 5.19_283.2638m/z- | 283.264 | 5.19 | 2.3E-02 | 1.15 | long-day flies |
| 6.57_758.4868m/z+ | 758.487 | 6.57 | 2.3E-02 | 1.91 | short-day flies |
| 9.97_899.7952n+ | 900.802 | 9.97 | 2.3E-02 | 1.90 | short-day flies |
| 1.55_414.2050n+ | 415.212 | 1.55 | 2.3E-02 | 1.48 | long-day flies |
| 3.78_1165.7501m/z+ | 1165.750 | 3.78 | 2.3E-02 | 1.29 | long-day flies |
| 7.11_569.3335m/z+ | 569.333 | 7.11 | 2.4E-02 | 1.42 | long-day flies |
| 8.02_808.5471m/z- | 808.547 | 8.02 | 2.4E-02 | 1.06 | short-day flies |
| 3.34_288.1755m/z+ | 288.175 | 3.34 | 2.4E-02 | 1.28 | long-day flies |
| 7.43_665.4473m/z+ | 665.447 | 7.43 | 2.4E-02 | 1.19 | long-day flies |
| 1.53_81.0713m/z+ | 81.071 | 1.53 | 2.4E-02 | 1.32 | long-day flies |
| 1.55_281.1393m/z+ | 281.139 | 1.55 | 2.4E-02 | 1.60 | long-day flies |
| 7.97_728.5598m/z+ | 728.560 | 7.97 | 2.4E-02 | 1.12 | short-day flies |
| 1.11_360.2379m/z+ | 360.238 | 1.11 | 2.5E-02 | 1.20 | long-day flies |
| 9.39_763.6694n+ | 764.677 | 9.39 | 2.5E-02 | 1.42 | short-day flies |
| 1.57_499.2638m/z+ | 499.264 | 1.57 | 2.6E-02 | 1.37 | long-day flies |
| 7.97_587.5370m/z+ | 587.537 | 7.97 | 2.6E-02 | 1.26 | short-day flies |
| 9.79_819.7319n+ | 820.739 | 9.79 | 2.6E-02 | 1.41 | short-day flies |
| 9.61_817.7164n+ | 818.724 | 9.61 | 2.6E-02 | 1.41 | short-day flies |
| 8.27_768.5491m/z+ | 768.549 | 8.27 | 2.6E-02 | 1.14 | short-day flies |
| 7.71_800.5920m/z+ | 800.592 | 7.71 | 2.7E-02 | 1.38 | short-day flies |
| 8.15_704.5581m/z+ | 704.558 | 8.15 | 2.7E-02 | 1.27 | short-day flies |
| 1.55_135.0815m/z+ | 135.081 | 1.55 | 2.8E-02 | 1.48 | long-day flies |
| 1.55_473.2654m/z+ | 473.265 | 1.55 | 2.8E-02 | 1.31 | long-day flies |
| 9.60_797.6628m/z+ | 797.663 | 9.60 | 2.8E-02 | 1.57 | short-day flies |
| 8.22_730.5750m/z+ | 730.575 | 8.22 | 2.9E-02 | 1.14 | short-day flies |
| 7.62_806.5682m/z+ | 806.568 | 7.62 | 2.9E-02 | 1.45 | short-day flies |
| 8.52_777.5903m/z- | 777.590 | 8.52 | 3.0E-02 | 1.17 | long-day flies |
| 1.55_846.4451m/z+ | 846.445 | 1.55 | 3.0E-02 | 2.19 | long-day flies |
| 1.55_483.2501m/z+ | 483.250 | 1.55 | 3.0E-02 | 1.33 | long-day flies |
| 4.20_533.4547m/z- | 533.455 | 4.20 | 3.1E-02 | 1.35 | long-day flies |
| 8.31_756.5908m/z+ | 756.591 | 8.31 | 3.1E-02 | 1.18 | short-day flies |
| 7.90_577.5161m/z+ | 577.516 | 7.90 | 3.2E-02 | 1.14 | short-day flies |
| 5.07_422.2490n+ | 405.246 | 5.07 | 3.2E-02 | 1.20 | long-day flies |
| 7.32_409.3107m/z+ | 409.311 | 7.32 | 3.3E-02 | 1.20 | long-day flies |
| 2.23_567.3650m/z+ | 567.365 | 2.23 | 3.3E-02 | 1.19 | long-day flies |
| 4.20_587.5073m/z- | 587.507 | 4.20 | 3.3E-02 | 1.35 | long-day flies |
| 4.85_782.4792m/z+ | 782.479 | 4.85 | 3.3E-02 | 1.16 | long-day flies |
| 7.14_585.3285m/z- | 585.329 | 7.14 | 3.3E-02 | 1.18 | long-day flies |
| 1.06_272.1866m/z+ | 272.187 | 1.06 | 3.3E-02 | 1.17 | long-day flies |
| 1.54_295.1184m/z+ | 295.118 | 1.54 | 3.4E-02 | 1.46 | long-day flies |
| 8.87_655.5754n+ | 656.583 | 8.87 | 3.4E-02 | 1.37 | short-day flies |
| 9.60_791.7007n+ | 792.708 | 9.60 | 3.4E-02 | 1.39 | short-day flies |
| 7.71_601.5155m/z+ | 601.516 | 7.71 | 3.5E-02 | 1.16 | short-day flies |
| 14.38_576.2431m/z- | 576.243 | 14.38 | 3.5E-02 | 1.34 | long-day flies |
| 8.53_559.4399m/z- | 559.440 | 8.53 | 3.5E-02 | 1.17 | long-day flies |
| 8.48_754.5724m/z+ | 754.572 | 8.48 | 3.7E-02 | 1.59 | short-day flies |
| 5.92_319.3363m/z+ | 319.336 | 5.92 | 3.7E-02 | 1.18 | long-day flies |
| 9.19_735.6206n+ | 736.628 | 9.19 | 3.8E-02 | 1.17 | short-day flies |
| 10.11_907.7751m/z+ | 907.775 | 10.11 | 3.8E-02 | 2.09 | short-day flies |
| 8.27_728.5596m/z- | 728.560 | 8.27 | 3.9E-02 | 1.13 | short-day flies |
| 7.57_738.5039m/z+ | 738.504 | 7.57 | 3.9E-02 | 1.19 | short-day flies |
| 6.83_802.5372m/z+ | 802.537 | 6.83 | 3.9E-02 | 1.72 | short-day flies |
| 10.12_875.7941n+ | 876.801 | 10.12 | 3.9E-02 | 1.59 | short-day flies |
| 1.53_250.1199m/z+ | 250.120 | 1.53 | 4.0E-02 | 1.29 | long-day flies |
| 5.61_538.4106m/z- | 538.411 | 5.61 | 4.0E-02 | 1.25 | long-day flies |
| 5.16_615.5386m/z- | 615.539 | 5.16 | 4.0E-02 | 1.17 | long-day flies |
| 8.52_517.3927m/z- | 517.393 | 8.52 | 4.0E-02 | 1.14 | long-day flies |
| 6.20_517.3899m/z- | 517.390 | 6.20 | 4.0E-02 | 1.35 | long-day flies |
| 10.05_379.3353m/z+ | 379.335 | 10.05 | 4.0E-02 | 1.44 | short-day flies |
| 1.55_460.2697m/z+ | 460.270 | 1.55 | 4.1E-02 | 1.45 | long-day flies |
| 5.07_406.2533m/z+ | 406.253 | 5.07 | 4.2E-02 | 1.10 | long-day flies |
| 3.49_850.5427m/z+ | 850.543 | 3.49 | 4.2E-02 | 1.31 | long-day flies |
| 1.56_133.0661m/z+ | 133.066 | 1.56 | 4.3E-02 | 1.40 | long-day flies |
| 8.09_770.5698m/z+ | 770.570 | 8.09 | 4.3E-02 | 1.24 | short-day flies |
| 8.88_494.4929m/z+ | 494.493 | 8.88 | 4.4E-02 | 1.20 | long-day flies |
| 2.43_334.1791m/z+ | 334.179 | 2.43 | 4.4E-02 | 1.13 | long-day flies |
| 8.27_810.5624m/z- | 810.562 | 8.27 | 4.4E-02 | 1.15 | short-day flies |
| 7.83_577.4437m/z+ | 577.444 | 7.83 | 4.4E-02 | 1.17 | long-day flies |
| 7.42_683.5101m/z+ | 683.510 | 7.42 | 4.5E-02 | 1.22 | short-day flies |
| 7.85_487.3797m/z- | 487.380 | 7.85 | 4.5E-02 | 1.27 | long-day flies |
| 9.37_717.6002m/z+ | 717.600 | 9.37 | 4.6E-02 | 1.39 | short-day flies |
| 4.03_667.9488m/z+ | 667.949 | 4.03 | 4.6E-02 | 1.30 | long-day flies |
| 6.27_568.4571m/z+ | 568.457 | 6.27 | 4.8E-02 | 1.21 | long-day flies |
| 9.79_825.6946m/z+ | 825.695 | 9.79 | 4.9E-02 | 1.46 | short-day flies |
| 5.28_924.0694m/z+ | 924.069 | 5.28 | 4.9E-02 | 1.22 | long-day flies |
| 6.76_366.3734m/z+ | 366.373 | 6.76 | 4.9E-02 | 1.41 | short-day flies |
| 8.04_824.5392m/z- | 824.539 | 8.04 | 4.9E-02 | 1.11 | short-day flies |
| 3.09_512.4162m/z+ | 512.416 | 3.09 | 5.0E-02 | 1.15 | long-day flies |
| 8.40_507.5134m/z+ | 507.513 | 8.40 | 5.2E-02 | 1.50 | long-day flies |
| 14.34_305.0594m/z- | 305.059 | 14.34 | 5.2E-02 | 1.17 | long-day flies |
| 9.78_793.7164n+ | 794.724 | 9.78 | 5.3E-02 | 1.36 | short-day flies |
| 10.28_933.7237m/z- | 933.724 | 10.28 | 5.3E-02 | 1.06 | long-day flies |
| 10.36_892.7625m/z+ | 892.763 | 10.36 | 5.4E-02 | 1.17 | long-day flies |
| 9.61_823.6825m/z+ | 823.683 | 9.61 | 5.5E-02 | 1.59 | short-day flies |
| 9.38_737.6531n+ | 738.660 | 9.38 | 5.6E-02 | 1.30 | short-day flies |
| 6.49_598.3796m/z+ | 598.380 | 6.49 | 5.6E-02 | 1.23 | long-day flies |
| 7.88_529.4614m/z+ | 529.461 | 7.88 | 5.6E-02 | 1.09 | long-day flies |
| 13.03_618.2906m/z+ | 618.291 | 13.03 | 5.7E-02 | 1.43 | short-day flies |
| 8.48_466.4615m/z+ | 466.462 | 8.48 | 5.7E-02 | 1.16 | long-day flies |
| 3.70_531.2746m/z+ | 531.275 | 3.70 | 5.7E-02 | 1.11 | long-day flies |
| 5.86_780.4814m/z+ | 780.481 | 5.86 | 5.7E-02 | 1.71 | short-day flies |
| 6.22_782.4971m/z+ | 782.497 | 6.22 | 5.8E-02 | 1.87 | short-day flies |
| 8.46_222.1268n+ | 205.124 | 8.46 | 5.8E-02 | 1.16 | long-day flies |
| 10.15_941.7850m/z- | 941.785 | 10.15 | 5.9E-02 | 1.50 | long-day flies |
| 10.12_901.8104n+ | 902.818 | 10.12 | 6.0E-02 | 1.48 | short-day flies |
| 8.54_730.5750m/z- | 730.575 | 8.54 | 6.1E-02 | 1.14 | short-day flies |
| 4.52_413.3279m/z+ | 413.328 | 4.52 | 6.2E-02 | 1.30 | long-day flies |
| 1.56_895.4577m/z+ | 895.458 | 1.56 | 6.2E-02 | 1.73 | long-day flies |
| 9.37_743.6155m/z+ | 743.616 | 9.37 | 6.3E-02 | 1.40 | short-day flies |
| 7.83_383.3155m/z+ | 383.316 | 7.83 | 6.3E-02 | 1.11 | long-day flies |
| 9.19_715.5836m/z+ | 715.584 | 9.19 | 6.4E-02 | 1.42 | short-day flies |
| 8.37_754.5748m/z- | 754.575 | 8.37 | 6.4E-02 | 1.15 | short-day flies |
| 8.20_702.5436m/z- | 702.544 | 8.20 | 6.4E-02 | 1.31 | short-day flies |
| 9.59_765.6849n+ | 766.692 | 9.59 | 6.6E-02 | 1.32 | short-day flies |
| 8.49_732.5898m/z+ | 732.590 | 8.49 | 6.8E-02 | 1.12 | short-day flies |
| 5.84_595.4724m/z+ | 595.472 | 5.84 | 6.8E-02 | 1.68 | short-day flies |
| 15.07_128.0958n+ | 170.130 | 15.07 | 6.8E-02 | 1.11 | long-day flies |
| 5.41_420.2685m/z+ | 420.268 | 5.41 | 6.8E-02 | 1.19 | long-day flies |
| 10.22_874.7067m/z- | 874.707 | 10.22 | 6.9E-02 | 1.31 | long-day flies |
| 13.43_618.2907m/z+ | 618.291 | 13.43 | 6.9E-02 | 1.24 | short-day flies |
| 9.79_768.7079m/z+ | 768.708 | 9.79 | 7.0E-02 | 1.31 | short-day flies |
| 5.04_383.3088m/z+ | 383.309 | 5.04 | 7.0E-02 | 1.07 | long-day flies |
| 5.78_425.3056m/z- | 425.306 | 5.78 | 7.0E-02 | 1.26 | long-day flies |
| 1.56_59.0623m/z+ | 59.062 | 1.56 | 7.1E-02 | 1.24 | long-day flies |
| 9.45_816.7084m/z+ | 816.708 | 9.45 | 7.2E-02 | 1.59 | short-day flies |
| 7.40_636.5767m/z+ | 636.577 | 7.40 | 7.3E-02 | 13.46 | long-day flies |
| 2.61_325.1844m/z- | 325.184 | 2.61 | 7.3E-02 | 2.49 | long-day flies |
| 5.19_687.5775m/z- | 687.578 | 5.19 | 7.4E-02 | 1.21 | long-day flies |
| 7.07_368.3896m/z+ | 368.390 | 7.07 | 7.4E-02 | 1.36 | long-day flies |
| 7.27_736.4897m/z+ | 736.490 | 7.27 | 7.5E-02 | 1.12 | short-day flies |
| 7.16_512.4635m/z+ | 512.463 | 7.16 | 7.6E-02 | 1.11 | long-day flies |
| 8.01_507.3754m/z- | 507.375 | 8.01 | 7.7E-02 | 1.19 | short-day flies |
| 9.59_771.6469m/z+ | 771.647 | 9.59 | 7.7E-02 | 1.30 | short-day flies |
| 7.47_751.6207m/z+ | 751.621 | 7.47 | 7.8E-02 | 1.80 | long-day flies |
| 9.37_711.6379n+ | 712.645 | 9.37 | 7.8E-02 | 1.29 | short-day flies |
| 2.43_335.2795m/z+ | 335.280 | 2.43 | 8.0E-02 | 1.16 | long-day flies |
| 7.20_804.5530m/z+ | 804.553 | 7.20 | 8.0E-02 | 1.26 | short-day flies |
| 10.44_1055.8705m/z- | 1055.871 | 10.44 | 8.0E-02 | 1.69 | long-day flies |
| 4.44_517.3630n+ | 559.395 | 4.44 | 8.1E-02 | 1.31 | long-day flies |
| 8.51_529.4623m/z- | 529.462 | 8.51 | 8.1E-02 | 1.06 | long-day flies |
| 9.64_896.7709m/z+ | 896.771 | 9.64 | 8.2E-02 | 1.64 | short-day flies |
| 8.00_691.5755m/z+ | 691.575 | 8.00 | 8.3E-02 | 1.30 | short-day flies |
| 8.75_535.5440m/z+ | 535.544 | 8.75 | 8.3E-02 | 1.44 | long-day flies |
| 6.22_804.4813m/z+ | 804.481 | 6.22 | 8.4E-02 | 1.98 | short-day flies |
| 7.61_787.5780m/z+ | 787.578 | 7.61 | 8.5E-02 | 1.45 | short-day flies |
| 1.22_115.9199m/z- | 115.920 | 1.22 | 8.6E-02 | 1.07 | long-day flies |
| 7.86_770.6068m/z+ | 770.607 | 7.86 | 8.7E-02 | 1.85 | short-day flies |
| 7.82_301.1653m/z- | 301.165 | 7.82 | 8.7E-02 | 1.14 | long-day flies |
| 9.96_821.7474n+ | 822.755 | 9.96 | 8.7E-02 | 1.34 | short-day flies |
| 3.71_589.3277m/z+ | 589.328 | 3.71 | 9.0E-02 | 1.11 | long-day flies |
| 5.86_778.4658m/z- | 778.466 | 5.86 | 9.1E-02 | 1.73 | short-day flies |
| 8.55_758.6064m/z+ | 758.606 | 8.55 | 9.1E-02 | 1.21 | short-day flies |
| 6.76_340.3578m/z+ | 340.358 | 6.76 | 9.3E-02 | 1.58 | short-day flies |
| 8.25_740.5230m/z- | 740.523 | 8.25 | 9.4E-02 | 1.71 | short-day flies |
| 1.56_358.2267m/z+ | 358.227 | 1.56 | 9.5E-02 | 1.09 | long-day flies |
| 14.55_141.0526m/z- | 141.053 | 14.55 | 9.6E-02 | 1.07 | long-day flies |
| 7.83_571.4814n+ | 572.489 | 7.83 | 9.6E-02 | 1.08 | long-day flies |
| 15.07_239.0494m/z+ | 239.049 | 15.07 | 9.7E-02 | 1.11 | long-day flies |
| 10.47_1013.8245m/z- | 1013.825 | 10.47 | 9.7E-02 | 1.36 | short-day flies |
| 6.24_437.3417m/z- | 437.342 | 6.24 | 9.7E-02 | 1.08 | long-day flies |
| 12.15_319.2269m/z- | 319.227 | 12.15 | 9.7E-02 | 1.17 | long-day flies |
| 9.59_739.6690n+ | 740.676 | 9.59 | 9.8E-02 | 1.28 | short-day flies |
| 13.37_273.1684m/z+ | 273.168 | 13.37 | 9.8E-02 | 1.19 | short-day flies |
| 9.35_822.6192m/z- | 822.619 | 9.35 | 9.8E-02 | 1.31 | long-day flies |
| 14.76_387.0340m/z- | 387.034 | 14.76 | 9.9E-02 | 1.11 | long-day flies |
| 2.30_857.4667m/z+ | 857.467 | 2.30 | 9.9E-02 | 1.28 | long-day flies |
| 7.62_717.5557m/z- | 717.556 | 7.62 | 1.0E-01 | 1.29 | short-day flies |
| 9.78_799.6774m/z+ | 799.677 | 9.78 | 1.0E-01 | 1.28 | short-day flies |
| 9.27_619.4612m/z- | 619.461 | 9.27 | 1.0E-01 | 1.26 | long-day flies |
| 8.98_559.4401m/z- | 559.440 | 8.98 | 1.0E-01 | 1.05 | long-day flies |
| 6.11_675.6761m/z+ | 675.676 | 6.11 | 1.0E-01 | 1.59 | short-day flies |
| 7.26_786.5290m/z- | 786.529 | 7.26 | 1.0E-01 | 1.89 | short-day flies |
| 3.45_526.4302m/z+ | 526.430 | 3.45 | 1.0E-01 | 1.13 | long-day flies |
| 6.60_784.5131m/z+ | 784.513 | 6.60 | 1.0E-01 | 1.74 | short-day flies |
| 13.93_375.1781m/z- | 375.178 | 13.93 | 1.0E-01 | 1.15 | long-day flies |
| 10.86_1001.8065m/z- | 1001.807 | 10.86 | 1.0E-01 | 1.51 | long-day flies |
| 14.73_576.2432m/z- | 576.243 | 14.73 | 1.0E-01 | 1.20 | long-day flies |
| 6.56_858.5272n+ | 876.561 | 6.56 | 1.1E-01 | 1.49 | short-day flies |
| 5.11_331.2669m/z- | 331.267 | 5.11 | 1.1E-01 | 1.08 | long-day flies |
| 5.86_802.4635m/z+ | 802.464 | 5.86 | 1.1E-01 | 2.06 | short-day flies |
| 6.61_678.4496n+ | 696.484 | 6.61 | 1.1E-01 | 1.17 | long-day flies |
| 3.43_641.4130m/z+ | 641.413 | 3.43 | 1.1E-01 | 1.19 | long-day flies |
| 9.65_760.6244n- | 819.636 | 9.65 | 1.1E-01 | 1.04 | long-day flies |
| 6.57_599.5026m/z+ | 599.503 | 6.57 | 1.1E-01 | 1.29 | short-day flies |
| 10.35_1055.8730m/z- | 1055.873 | 10.35 | 1.1E-01 | 1.74 | long-day flies |
| 3.15_526.3656m/z+ | 526.366 | 3.15 | 1.1E-01 | 1.12 | long-day flies |
| 9.82_789.6099m/z- | 789.610 | 9.82 | 1.1E-01 | 1.54 | long-day flies |
| 6.16_336.3266m/z- | 336.327 | 6.16 | 1.1E-01 | 1.40 | short-day flies |
| 7.31_448.3609n- | 507.376 | 7.31 | 1.1E-01 | 1.14 | short-day flies |
| 13.55_570.4556m/z+ | 570.456 | 13.55 | 1.1E-01 | 1.13 | long-day flies |
| 6.25_423.3285m/z+ | 423.328 | 6.25 | 1.1E-01 | 1.16 | long-day flies |
| 9.02_718.5730m/z- | 718.573 | 9.02 | 1.1E-01 | 1.41 | long-day flies |
| 10.72_1032.8671m/z+ | 1032.867 | 10.72 | 1.1E-01 | 1.18 | short-day flies |
| 7.37_1194.8225m/z+ | 1194.823 | 7.37 | 1.1E-01 | 1.48 | short-day flies |
| 10.53_1001.8067m/z- | 1001.807 | 10.53 | 1.1E-01 | 1.06 | long-day flies |
| 7.76_621.5205m/z+ | 621.520 | 7.76 | 1.1E-01 | 1.08 | long-day flies |
| 1.52_170.0572m/z+ | 170.057 | 1.52 | 1.2E-01 | 1.21 | long-day flies |
| 11.77_319.2270m/z- | 319.227 | 11.77 | 1.2E-01 | 1.32 | long-day flies |
| 8.52_760.6246n- | 819.637 | 8.52 | 1.2E-01 | 1.15 | long-day flies |
| 8.43_717.5706m/z- | 717.571 | 8.43 | 1.2E-01 | 1.18 | short-day flies |
| 13.19_319.2274m/z- | 319.227 | 13.19 | 1.2E-01 | 1.18 | long-day flies |
| 3.40_570.4567m/z+ | 570.457 | 3.40 | 1.2E-01 | 1.13 | long-day flies |
| 10.04_836.7703m/z+ | 836.770 | 10.04 | 1.2E-01 | 2.31 | long-day flies |
| 7.42_367.3574m/z- | 367.357 | 7.42 | 1.2E-01 | 1.36 | short-day flies |
| 7.48_582.4734m/z+ | 582.473 | 7.48 | 1.2E-01 | 1.17 | long-day flies |
| 3.73_171.1394m/z+ | 171.139 | 3.73 | 1.2E-01 | 1.95 | long-day flies |
| 14.15_168.0029m/z- | 168.003 | 14.15 | 1.2E-01 | 1.18 | short-day flies |
| 1.30_388.2298m/z+ | 388.230 | 1.30 | 1.2E-01 | 1.09 | long-day flies |
| 8.14_768.5541m/z- | 768.554 | 8.14 | 1.3E-01 | 1.19 | short-day flies |
| 6.24_780.4818m/z- | 780.482 | 6.24 | 1.3E-01 | 1.88 | short-day flies |
| 2.07_768.5374m/z+ | 768.537 | 2.07 | 1.3E-01 | 1.38 | long-day flies |
| 13.79_618.2898m/z+ | 618.290 | 13.79 | 1.3E-01 | 1.09 | long-day flies |
| 14.49_305.0604m/z- | 305.060 | 14.49 | 1.3E-01 | 1.14 | long-day flies |
| 6.56_881.5135m/z+ | 881.514 | 6.56 | 1.3E-01 | 1.54 | short-day flies |
| 7.54_580.4940m/z+ | 580.494 | 7.54 | 1.3E-01 | 1.32 | long-day flies |
| 9.96_853.7228m/z+ | 853.723 | 9.96 | 1.3E-01 | 1.48 | short-day flies |
| 3.95_315.2535m/z+ | 315.253 | 3.95 | 1.3E-01 | 4.01 | short-day flies |
| 3.74_463.3511n+ | 464.358 | 3.74 | 1.3E-01 | 2.31 | long-day flies |
| 15.07_157.0015n+ | 139.998 | 15.07 | 1.3E-01 | 1.09 | long-day flies |
| 3.73_617.3570m/z+ | 617.357 | 3.73 | 1.3E-01 | 1.17 | long-day flies |
| 6.37_737.5113m/z+ | 737.511 | 6.37 | 1.4E-01 | 1.21 | long-day flies |
| 3.54_468.3901m/z+ | 468.390 | 3.54 | 1.4E-01 | 5.62 | long-day flies |
| 6.50_422.2478m/z+ | 422.248 | 6.50 | 1.4E-01 | 1.14 | long-day flies |
| 9.96_827.7079m/z+ | 827.708 | 9.96 | 1.4E-01 | 1.40 | short-day flies |
| 14.96_100.9329m/z- | 100.933 | 14.96 | 1.5E-01 | 1.05 | long-day flies |
| 10.67_1055.8737m/z- | 1055.874 | 10.67 | 1.5E-01 | 1.24 | short-day flies |
| 8.54_780.6020m/z+ | 780.602 | 8.54 | 1.5E-01 | 1.17 | short-day flies |
| 15.08_181.9805m/z+ | 181.980 | 15.08 | 1.5E-01 | 1.14 | long-day flies |
| 1.22_158.9748m/z- | 158.975 | 1.22 | 1.5E-01 | 1.07 | long-day flies |
| 7.44_788.5441m/z+ | 788.544 | 7.44 | 1.5E-01 | 1.72 | short-day flies |
| 5.14_379.3188m/z+ | 379.319 | 5.14 | 1.5E-01 | 1.18 | long-day flies |
| 9.59_745.6297m/z+ | 745.630 | 9.59 | 1.5E-01 | 1.31 | short-day flies |
| 4.72_269.2480m/z- | 269.248 | 4.72 | 1.5E-01 | 1.28 | long-day flies |
| 14.44_181.9815m/z+ | 181.981 | 14.44 | 1.6E-01 | 1.11 | long-day flies |
| 7.02_612.4842m/z+ | 612.484 | 7.02 | 1.6E-01 | 1.28 | long-day flies |
| 8.97_577.4134m/z- | 577.413 | 8.97 | 1.6E-01 | 1.16 | long-day flies |
| 7.13_601.5160m/z+ | 601.516 | 7.13 | 1.6E-01 | 1.27 | long-day flies |
| 4.24_672.5256m/z+ | 672.526 | 4.24 | 1.6E-01 | 8.25 | long-day flies |
| 10.26_941.7855m/z- | 941.785 | 10.26 | 1.6E-01 | 1.17 | long-day flies |
| 1.28_157.1226m/z- | 157.123 | 1.28 | 1.6E-01 | 1.15 | short-day flies |
| 6.19_456.3813m/z+ | 456.381 | 6.19 | 1.6E-01 | 1.07 | long-day flies |
| 5.59_540.4271m/z+ | 540.427 | 5.59 | 1.6E-01 | 1.13 | long-day flies |
| 15.07_299.0105m/z+ | 299.011 | 15.07 | 1.7E-01 | 1.07 | short-day flies |
| 14.61_589.5306m/z+ | 589.531 | 14.61 | 1.7E-01 | 1.07 | long-day flies |
| 9.05_849.6359m/z- | 849.636 | 9.05 | 1.7E-01 | 1.58 | long-day flies |
| 3.60_406.3290n+ | 407.336 | 3.60 | 1.7E-01 | 7.19 | long-day flies |
| 8.23_960.7083m/z+ | 960.708 | 8.23 | 1.7E-01 | 1.49 | short-day flies |
| 2.90_503.3258m/z+ | 503.326 | 2.90 | 1.7E-01 | 1.16 | long-day flies |
| 8.32_772.5853m/z+ | 772.585 | 8.32 | 1.7E-01 | 1.26 | short-day flies |
| 4.56_264.2464n+ | 282.280 | 4.56 | 1.8E-01 | 1.10 | long-day flies |
| 3.16_227.2010m/z- | 227.201 | 3.16 | 1.8E-01 | 1.29 | long-day flies |
| 3.50_512.4151m/z+ | 512.415 | 3.50 | 1.8E-01 | 6.06 | long-day flies |
| 7.27_788.5454m/z+ | 788.545 | 7.27 | 1.8E-01 | 1.63 | short-day flies |
| 3.02_600.4679m/z+ | 600.468 | 3.02 | 1.8E-01 | 1.14 | long-day flies |
| 6.98_859.5341m/z- | 859.534 | 6.98 | 1.8E-01 | 1.47 | short-day flies |
| 10.52_1073.8500m/z- | 1073.850 | 10.52 | 1.8E-01 | 1.04 | long-day flies |
| 15.08_140.9896n+ | 183.024 | 15.08 | 1.8E-01 | 1.09 | long-day flies |
| 8.89_681.5434m/z- | 681.543 | 8.89 | 1.8E-01 | 1.24 | long-day flies |
| 1.54_208.0729m/z+ | 208.073 | 1.54 | 1.8E-01 | 1.22 | long-day flies |
| 10.11_832.6647n- | 891.676 | 10.11 | 1.9E-01 | 1.04 | long-day flies |
| 10.39_932.8640m/z+ | 932.864 | 10.39 | 1.9E-01 | 1.24 | short-day flies |
| 7.47_741.5161m/z- | 741.516 | 7.47 | 1.9E-01 | 1.27 | short-day flies |
| 6.99_507.3759m/z- | 507.376 | 6.99 | 1.9E-01 | 1.13 | short-day flies |
| 10.15_777.5892m/z- | 777.589 | 10.15 | 1.9E-01 | 1.27 | long-day flies |
| 10.12_849.7735n+ | 850.781 | 10.12 | 1.9E-01 | 1.11 | short-day flies |
| 3.36_644.4937m/z+ | 644.494 | 3.36 | 1.9E-01 | 10.95 | long-day flies |
| 9.91_834.7539m/z+ | 834.754 | 9.91 | 1.9E-01 | 1.62 | long-day flies |
| 6.21_517.2651m/z- | 517.265 | 6.21 | 1.9E-01 | 1.15 | long-day flies |
| 15.07_162.9914n+ | 181.026 | 15.07 | 1.9E-01 | 1.08 | long-day flies |
| 3.42_600.4665m/z+ | 600.467 | 3.42 | 1.9E-01 | 7.00 | long-day flies |
| 15.07_155.0048n+ | 138.001 | 15.07 | 1.9E-01 | 1.10 | long-day flies |
| 3.47_482.4043m/z+ | 482.404 | 3.47 | 2.0E-01 | 1.19 | long-day flies |
| 12.73_654.3611m/z+ | 654.361 | 12.73 | 2.0E-01 | 1.27 | short-day flies |
| 9.00_933.7245m/z- | 933.725 | 9.00 | 2.0E-01 | 1.28 | long-day flies |
| 4.00_482.4025m/z+ | 482.403 | 4.00 | 2.0E-01 | 1.18 | long-day flies |
| 10.27_852.7994m/z+ | 852.799 | 10.27 | 2.0E-01 | 1.31 | long-day flies |
| 6.59_782.4970m/z- | 782.497 | 6.59 | 2.0E-01 | 1.71 | short-day flies |
| 7.60_381.3734m/z- | 381.373 | 7.60 | 2.0E-01 | 1.10 | long-day flies |
| 4.41_281.2479m/z- | 281.248 | 4.41 | 2.0E-01 | 1.20 | long-day flies |
| 7.03_784.5129m/z- | 784.513 | 7.03 | 2.0E-01 | 1.71 | short-day flies |
| 6.57_857.5177m/z- | 857.518 | 6.57 | 2.0E-01 | 1.26 | short-day flies |
| 6.11_360.3241m/z+ | 360.324 | 6.11 | 2.0E-01 | 1.24 | short-day flies |
| 7.02_786.5286m/z+ | 786.529 | 7.02 | 2.0E-01 | 1.58 | short-day flies |
| 2.18_179.1079m/z+ | 179.108 | 2.18 | 2.1E-01 | 1.13 | short-day flies |
| 7.76_1042.8721m/z+ | 1042.872 | 7.76 | 2.1E-01 | 140.78 | long-day flies |
| 7.73_563.4681m/z+ | 563.468 | 7.73 | 2.1E-01 | 1.19 | long-day flies |
| 13.03_654.3609m/z+ | 654.361 | 13.03 | 2.1E-01 | 1.17 | short-day flies |
| 7.90_769.5466m/z- | 769.547 | 7.90 | 2.1E-01 | 1.11 | short-day flies |
| 2.84_349.2952m/z+ | 349.295 | 2.84 | 2.1E-01 | 1.09 | long-day flies |
| 8.13_422.3996m/z+ | 422.400 | 8.13 | 2.2E-01 | 1.17 | long-day flies |
| 3.28_732.5476m/z+ | 732.548 | 3.28 | 2.2E-01 | 13.70 | long-day flies |
| 10.41_1053.8866m/z+ | 1053.887 | 10.41 | 2.2E-01 | 1.57 | long-day flies |
| 9.95_936.7172m/z- | 936.717 | 9.95 | 2.2E-01 | 1.37 | long-day flies |
| 6.11_320.3084n+ | 338.342 | 6.11 | 2.2E-01 | 1.14 | short-day flies |
| 12.92_618.2901m/z+ | 618.290 | 12.92 | 2.2E-01 | 1.19 | short-day flies |
| 7.67_926.7894m/z+ | 926.789 | 7.67 | 2.2E-01 | 48.92 | long-day flies |
| 8.38_778.6514m/z+ | 778.651 | 8.38 | 2.2E-01 | 1.12 | long-day flies |
| 1.05_460.2548m/z+ | 460.255 | 1.05 | 2.2E-01 | 1.13 | long-day flies |
| 8.30_559.4395m/z- | 559.440 | 8.30 | 2.2E-01 | 1.15 | short-day flies |
| 9.27_780.5707m/z- | 780.571 | 9.27 | 2.2E-01 | 1.33 | long-day flies |
| 7.93_607.4572m/z- | 607.457 | 7.93 | 2.3E-01 | 1.24 | long-day flies |
| 7.79_729.4272m/z+ | 729.427 | 7.79 | 2.3E-01 | 1.18 | long-day flies |
| 6.28_566.4415m/z- | 566.441 | 6.28 | 2.3E-01 | 1.37 | long-day flies |
| 8.27_892.5787m/z- | 892.579 | 8.27 | 2.3E-01 | 1.17 | short-day flies |
| 1.23_213.0550m/z- | 213.055 | 1.23 | 2.3E-01 | 1.11 | long-day flies |
| 5.53_336.3270m/z+ | 336.327 | 5.53 | 2.3E-01 | 1.46 | short-day flies |
| 8.63_527.4464m/z- | 527.446 | 8.63 | 2.3E-01 | 1.05 | long-day flies |
| 6.96_554.4412m/z+ | 554.441 | 6.96 | 2.3E-01 | 1.11 | long-day flies |
| 10.26_878.8177m/z+ | 878.818 | 10.26 | 2.4E-01 | 1.34 | long-day flies |
| 6.99_601.5174m/z+ | 601.517 | 6.99 | 2.4E-01 | 1.32 | short-day flies |
| 6.06_311.2950m/z- | 311.295 | 6.06 | 2.4E-01 | 1.11 | long-day flies |
| 2.26_616.4637m/z+ | 616.464 | 2.26 | 2.4E-01 | 1.10 | long-day flies |
| 6.61_737.5088m/z+ | 737.509 | 6.61 | 2.5E-01 | 1.07 | long-day flies |
| 9.80_413.2703m/z- | 413.270 | 9.80 | 2.5E-01 | 1.12 | short-day flies |
| 10.45_873.7054m/z- | 873.705 | 10.45 | 2.5E-01 | 1.70 | short-day flies |
| 15.07_179.0288m/z+ | 179.029 | 15.07 | 2.5E-01 | 1.07 | long-day flies |
| 15.07_269.0001m/z+ | 269.000 | 15.07 | 2.5E-01 | 1.05 | long-day flies |
| 8.45_946.7274m/z+ | 946.727 | 8.45 | 2.5E-01 | 1.55 | short-day flies |
| 3.19_407.3376m/z+ | 407.338 | 3.19 | 2.5E-01 | 1.22 | long-day flies |
| 11.53_570.4571m/z+ | 570.457 | 11.53 | 2.5E-01 | 1.08 | long-day flies |
| 7.14_468.4410m/z+ | 468.441 | 7.14 | 2.5E-01 | 1.10 | long-day flies |
| 2.80_503.3257m/z+ | 503.326 | 2.80 | 2.6E-01 | 1.16 | long-day flies |
| 7.14_159.0841m/z- | 159.084 | 7.14 | 2.6E-01 | 1.09 | long-day flies |
| 9.63_960.8276m/z+ | 960.828 | 9.63 | 2.6E-01 | 1.13 | long-day flies |
| 6.98_497.3923m/z+ | 497.392 | 6.98 | 2.6E-01 | 1.65 | long-day flies |
| 1.13_228.2331m/z+ | 228.233 | 1.13 | 2.6E-01 | 1.05 | long-day flies |
| 6.97_403.3064m/z- | 403.306 | 6.97 | 2.6E-01 | 1.04 | short-day flies |
| 8.67_706.5537m/z- | 706.554 | 8.67 | 2.6E-01 | 1.40 | short-day flies |
| 14.63_553.4580m/z+ | 553.458 | 14.63 | 2.6E-01 | 1.09 | long-day flies |
| 8.57_529.4610m/z+ | 529.461 | 8.57 | 2.6E-01 | 1.11 | short-day flies |
| 4.25_492.3016m/z+ | 492.302 | 4.25 | 2.7E-01 | 1.21 | long-day flies |
| 2.09_384.7704m/z+ | 384.770 | 2.09 | 2.7E-01 | 1.19 | long-day flies |
| 15.07_243.0451m/z+ | 243.045 | 15.07 | 2.7E-01 | 1.06 | long-day flies |
| 10.26_893.7726m/z+ | 893.773 | 10.26 | 2.7E-01 | 1.11 | long-day flies |
| 13.43_654.3605m/z+ | 654.360 | 13.43 | 2.7E-01 | 1.07 | short-day flies |
| 8.98_619.4613m/z- | 619.461 | 8.98 | 2.8E-01 | 1.06 | long-day flies |
| 8.76_966.7898m/z+ | 966.790 | 8.76 | 2.9E-01 | 1.39 | short-day flies |
| 1.37_392.2795n+ | 434.314 | 1.37 | 2.9E-01 | 1.18 | short-day flies |
| 15.09_595.2622n+ | 578.259 | 15.09 | 2.9E-01 | 1.04 | long-day flies |
| 15.00_576.2430m/z- | 576.243 | 15.00 | 2.9E-01 | 1.22 | long-day flies |
| 3.45_556.4412m/z+ | 556.441 | 3.45 | 2.9E-01 | 3.48 | long-day flies |
| 2.16_491.2315m/z+ | 491.232 | 2.16 | 3.0E-01 | 1.12 | long-day flies |
| 8.04_559.4397m/z- | 559.440 | 8.04 | 3.0E-01 | 1.08 | short-day flies |
| 2.72_498.4005m/z+ | 498.401 | 2.72 | 3.0E-01 | 1.07 | long-day flies |
| 3.64_363.3104m/z+ | 363.310 | 3.64 | 3.0E-01 | 4.89 | long-day flies |
| 3.13_468.3896m/z+ | 468.390 | 3.13 | 3.0E-01 | 1.13 | long-day flies |
| 8.29_759.6169m/z- | 759.617 | 8.29 | 3.1E-01 | 1.34 | long-day flies |
| 7.85_702.5427m/z+ | 702.543 | 7.85 | 3.1E-01 | 1.35 | short-day flies |
| 7.63_445.3529m/z- | 445.353 | 7.63 | 3.1E-01 | 1.02 | short-day flies |
| 9.33_946.6722m/z+ | 946.672 | 9.33 | 3.1E-01 | 1.21 | long-day flies |
| 8.92_158.0136m/z+ | 158.014 | 8.92 | 3.1E-01 | 1.05 | long-day flies |
| 5.61_146.0589n+ | 129.056 | 5.61 | 3.2E-01 | 1.42 | long-day flies |
| 9.17_757.6488m/z+ | 757.649 | 9.17 | 3.2E-01 | 1.05 | long-day flies |
| 5.61_371.3162m/z+ | 371.316 | 5.61 | 3.2E-01 | 1.44 | long-day flies |
| 2.14_836.5966m/z+ | 836.597 | 2.14 | 3.2E-01 | 1.15 | short-day flies |
| 6.73_857.4781n+ | 899.509 | 6.73 | 3.2E-01 | 1.07 | long-day flies |
| 8.13_1184.6790m/z+ | 1184.679 | 8.13 | 3.2E-01 | 1.28 | long-day flies |
| 3.33_688.5201m/z+ | 688.520 | 3.33 | 3.2E-01 | 8.81 | long-day flies |
| 5.61_258.1842n+ | 259.192 | 5.61 | 3.2E-01 | 1.43 | long-day flies |
| 10.41_906.8481m/z+ | 906.848 | 10.41 | 3.3E-01 | 1.32 | long-day flies |
| 6.47_929.5458m/z+ | 929.546 | 6.47 | 3.3E-01 | 1.23 | long-day flies |
| 9.09_822.6179m/z- | 822.618 | 9.09 | 3.3E-01 | 1.30 | short-day flies |
| 9.42_718.5778n- | 777.589 | 9.42 | 3.3E-01 | 1.04 | long-day flies |
| 2.85_776.5742m/z+ | 776.574 | 2.85 | 3.3E-01 | 1.10 | long-day flies |
| 8.03_517.3927m/z- | 517.393 | 8.03 | 3.3E-01 | 1.07 | short-day flies |
| 8.27_605.5398m/z+ | 605.540 | 8.27 | 3.3E-01 | 1.11 | short-day flies |
| 14.59_146.9653m/z- | 146.965 | 14.59 | 3.3E-01 | 1.11 | short-day flies |
| 9.37_944.6563m/z- | 944.656 | 9.37 | 3.3E-01 | 1.14 | long-day flies |
| 3.63_439.3039m/z+ | 439.304 | 3.63 | 3.3E-01 | 1.11 | long-day flies |
| 13.66_337.2351m/z- | 337.235 | 13.66 | 3.4E-01 | 1.08 | long-day flies |
| 8.60_756.5902m/z- | 756.590 | 8.60 | 3.4E-01 | 1.10 | short-day flies |
| 8.60_466.4620m/z+ | 466.462 | 8.60 | 3.4E-01 | 1.14 | long-day flies |
| 7.09_697.4933n+ | 739.525 | 7.09 | 3.4E-01 | 1.07 | long-day flies |
| 7.71_473.3995m/z- | 473.400 | 7.71 | 3.4E-01 | 1.03 | long-day flies |
| 8.36_836.5785m/z- | 836.578 | 8.36 | 3.4E-01 | 1.36 | short-day flies |
| 2.34_250.1443m/z- | 250.144 | 2.34 | 3.4E-01 | 1.09 | long-day flies |
| 6.66_409.3102m/z- | 409.310 | 6.66 | 3.5E-01 | 1.08 | long-day flies |
| 15.09_556.2770m/z+ | 556.277 | 15.09 | 3.5E-01 | 1.04 | long-day flies |
| 5.61_188.1063n+ | 171.103 | 5.61 | 3.5E-01 | 1.37 | long-day flies |
| 10.45_1051.8694m/z- | 1051.869 | 10.45 | 3.5E-01 | 1.31 | long-day flies |
| 7.46_694.6194m/z+ | 694.619 | 7.46 | 3.5E-01 | 40.91 | long-day flies |
| 10.85_654.3609m/z+ | 654.361 | 10.85 | 3.5E-01 | 1.16 | long-day flies |
| 1.78_515.2759m/z+ | 515.276 | 1.78 | 3.5E-01 | 1.21 | long-day flies |
| 4.33_584.4744m/z+ | 584.474 | 4.33 | 3.6E-01 | 3.47 | long-day flies |
| 8.46_59.0623m/z+ | 59.062 | 8.46 | 3.6E-01 | 1.04 | long-day flies |
| 1.23_305.0805m/z- | 305.081 | 1.23 | 3.6E-01 | 1.07 | long-day flies |
| 9.81_404.3080m/z- | 404.308 | 9.81 | 3.6E-01 | 1.10 | short-day flies |
| 2.37_440.3586m/z+ | 440.359 | 2.37 | 3.6E-01 | 1.08 | long-day flies |
| 2.92_732.5476m/z+ | 732.548 | 2.92 | 3.7E-01 | 1.07 | long-day flies |
| 10.05_810.7550m/z+ | 810.755 | 10.05 | 3.7E-01 | 1.52 | long-day flies |
| 14.44_61.9876m/z- | 61.988 | 14.44 | 3.7E-01 | 1.05 | short-day flies |
| 9.17_732.6144m/z+ | 732.614 | 9.17 | 3.7E-01 | 1.10 | short-day flies |
| 2.81_467.3490m/z+ | 467.349 | 2.81 | 3.7E-01 | 1.13 | long-day flies |
| 6.57_484.4355m/z+ | 484.435 | 6.57 | 3.8E-01 | 1.08 | long-day flies |
| 9.50_894.6650m/z- | 894.665 | 9.50 | 3.8E-01 | 1.15 | short-day flies |
| 14.91_141.0163m/z- | 141.016 | 14.91 | 3.9E-01 | 1.03 | long-day flies |
| 8.44_679.4327m/z+ | 679.433 | 8.44 | 3.9E-01 | 1.08 | short-day flies |
| 10.02_960.8273m/z+ | 960.827 | 10.02 | 3.9E-01 | 1.08 | long-day flies |
| 9.33_1004.7257m/z+ | 1004.726 | 9.33 | 3.9E-01 | 1.15 | long-day flies |
| 14.26_654.3607m/z+ | 654.361 | 14.26 | 3.9E-01 | 1.05 | long-day flies |
| 11.01_284.2667m/z- | 284.267 | 11.01 | 3.9E-01 | 1.11 | long-day flies |
| 15.07_135.0038m/z+ | 135.004 | 15.07 | 4.0E-01 | 1.04 | long-day flies |
| 4.57_391.3400m/z+ | 391.340 | 4.57 | 4.0E-01 | 2.06 | long-day flies |
| 5.40_715.3978n+ | 757.428 | 5.40 | 4.0E-01 | 1.10 | long-day flies |
| 9.81_913.7994m/z+ | 913.799 | 9.81 | 4.0E-01 | 1.13 | short-day flies |
| 5.11_404.2378m/z- | 404.238 | 5.11 | 4.0E-01 | 1.15 | long-day flies |
| 10.09_960.8267m/z+ | 960.827 | 10.09 | 4.0E-01 | 1.13 | short-day flies |
| 2.33_331.2185m/z+ | 331.219 | 2.33 | 4.0E-01 | 1.70 | short-day flies |
| 9.81_874.7073m/z- | 874.707 | 9.81 | 4.0E-01 | 1.23 | short-day flies |
| 8.31_778.5804m/z+ | 778.580 | 8.31 | 4.1E-01 | 1.03 | short-day flies |
| 4.91_444.3794m/z+ | 444.379 | 4.91 | 4.1E-01 | 1.36 | short-day flies |
| 4.19_716.5499m/z+ | 716.550 | 4.19 | 4.1E-01 | 8.19 | long-day flies |
| 6.98_640.4936n+ | 658.525 | 6.98 | 4.1E-01 | 4.43 | long-day flies |
| 8.10_158.0137m/z+ | 158.014 | 8.10 | 4.1E-01 | 1.08 | long-day flies |
| 8.62_664.5746m/z+ | 664.575 | 8.62 | 4.2E-01 | 1.03 | long-day flies |
| 9.49_949.6942n+ | 932.691 | 9.49 | 4.2E-01 | 1.18 | long-day flies |
| 13.80_375.1782m/z- | 375.178 | 13.80 | 4.2E-01 | 1.13 | short-day flies |
| 7.03_410.3992m/z+ | 410.399 | 7.03 | 4.2E-01 | 1.08 | long-day flies |
| 7.63_868.7462m/z+ | 868.746 | 7.63 | 4.2E-01 | 32.95 | long-day flies |
| 2.79_392.3144n+ | 393.322 | 2.79 | 4.2E-01 | 1.07 | long-day flies |
| 1.22_100.9328m/z- | 100.933 | 1.22 | 4.2E-01 | 1.02 | long-day flies |
| 9.81_777.5887m/z- | 777.589 | 9.81 | 4.2E-01 | 1.05 | short-day flies |
| 8.96_517.3930m/z- | 517.393 | 8.96 | 4.2E-01 | 1.03 | long-day flies |
| 14.19_553.4581m/z+ | 553.458 | 14.19 | 4.3E-01 | 1.06 | short-day flies |
| 8.06_475.3503m/z- | 475.350 | 8.06 | 4.3E-01 | 1.04 | short-day flies |
| 14.95_181.9815m/z+ | 181.982 | 14.95 | 4.3E-01 | 1.07 | long-day flies |
| 2.48_166.0276n+ | 149.024 | 2.48 | 4.3E-01 | 1.18 | long-day flies |
| 9.51_930.6761m/z- | 930.676 | 9.51 | 4.4E-01 | 1.21 | long-day flies |
| 11.87_654.3623m/z+ | 654.362 | 11.87 | 4.4E-01 | 1.12 | short-day flies |
| 7.98_750.5412m/z+ | 750.541 | 7.98 | 4.4E-01 | 1.02 | short-day flies |
| 14.90_553.4578m/z+ | 553.458 | 14.90 | 4.4E-01 | 1.06 | long-day flies |
| 11.87_570.4576m/z+ | 570.458 | 11.87 | 4.5E-01 | 1.09 | long-day flies |
| 2.39_379.3060m/z+ | 379.306 | 2.39 | 4.5E-01 | 1.08 | long-day flies |
| 7.37_786.5613m/z+ | 786.561 | 7.37 | 4.5E-01 | 1.46 | long-day flies |
| 8.12_338.3422m/z+ | 338.342 | 8.12 | 4.5E-01 | 1.10 | long-day flies |
| 5.52_413.2664m/z+ | 413.266 | 5.52 | 4.5E-01 | 1.04 | short-day flies |
| 4.38_540.4473m/z+ | 540.447 | 4.38 | 4.5E-01 | 2.70 | long-day flies |
| 9.09_809.6782m/z+ | 809.678 | 9.09 | 4.5E-01 | 1.09 | short-day flies |
| 2.70_641.4080m/z+ | 641.408 | 2.70 | 4.5E-01 | 1.08 | long-day flies |
| 10.29_961.8311m/z+ | 961.831 | 10.29 | 4.6E-01 | 1.05 | long-day flies |
| 8.47_569.4344m/z+ | 569.434 | 8.47 | 4.6E-01 | 1.06 | long-day flies |
| 8.37_758.2233m/z+ | 758.223 | 8.37 | 4.6E-01 | 1.55 | short-day flies |
| 4.19_350.2544m/z+ | 350.254 | 4.19 | 4.6E-01 | 1.08 | long-day flies |
| 4.55_657.3943m/z+ | 657.394 | 4.55 | 4.7E-01 | 1.12 | short-day flies |
| 5.61_393.2981m/z+ | 393.298 | 5.61 | 4.7E-01 | 1.36 | long-day flies |
| 3.89_219.1748m/z- | 219.175 | 3.89 | 4.7E-01 | 1.05 | long-day flies |
| 6.54_440.4098m/z+ | 440.410 | 6.54 | 4.7E-01 | 1.05 | long-day flies |
| 8.98_778.5922m/z- | 778.592 | 8.98 | 4.7E-01 | 1.08 | long-day flies |
| 7.71_984.8313m/z+ | 984.831 | 7.71 | 4.7E-01 | 57.93 | long-day flies |
| 1.79_587.2991m/z+ | 587.299 | 1.79 | 4.8E-01 | 1.11 | short-day flies |
| 8.46_530.4700n+ | 548.504 | 8.46 | 4.8E-01 | 1.02 | long-day flies |
| 8.22_752.5560m/z+ | 752.556 | 8.22 | 4.8E-01 | 1.03 | short-day flies |
| 7.51_621.5204m/z+ | 621.520 | 7.51 | 4.8E-01 | 1.05 | long-day flies |
| 3.05_556.4419m/z+ | 556.442 | 3.05 | 4.8E-01 | 1.05 | long-day flies |
| 7.85_711.5410m/z+ | 711.541 | 7.85 | 4.8E-01 | 1.03 | short-day flies |
| 10.57_941.7866m/z- | 941.787 | 10.57 | 4.8E-01 | 1.33 | long-day flies |
| 4.26_434.2479m/z+ | 434.248 | 4.26 | 4.9E-01 | 1.09 | long-day flies |
| 15.07_241.0486m/z+ | 241.049 | 15.07 | 4.9E-01 | 1.05 | long-day flies |
| 8.41_158.0138m/z+ | 158.014 | 8.41 | 4.9E-01 | 1.04 | long-day flies |
| 9.82_935.7259m/z- | 935.726 | 9.82 | 4.9E-01 | 1.16 | long-day flies |
| 8.46_419.3521m/z+ | 419.352 | 8.46 | 4.9E-01 | 1.02 | long-day flies |
| 2.95_688.5211m/z+ | 688.521 | 2.95 | 4.9E-01 | 1.03 | long-day flies |
| 7.13_798.5294m/z- | 798.529 | 7.13 | 5.0E-01 | 1.79 | long-day flies |
| 1.19_173.1083m/z+ | 173.108 | 1.19 | 5.0E-01 | 1.27 | long-day flies |
| 9.99_59.0130m/z- | 59.013 | 9.99 | 5.0E-01 | 1.10 | long-day flies |
| 15.05_614.3252m/z+ | 614.325 | 15.05 | 5.0E-01 | 1.03 | short-day flies |
| 4.70_444.3799m/z+ | 444.380 | 4.70 | 5.0E-01 | 1.28 | short-day flies |
| 14.74_168.0023m/z- | 168.002 | 14.74 | 5.0E-01 | 1.09 | short-day flies |
| 13.49_616.2740m/z- | 616.274 | 13.49 | 5.0E-01 | 1.09 | long-day flies |
| 9.26_560.4425m/z- | 560.443 | 9.26 | 5.1E-01 | 1.10 | short-day flies |
| 8.00_766.5329m/z+ | 766.533 | 8.00 | 5.1E-01 | 1.02 | short-day flies |
| 6.08_420.2748m/z+ | 420.275 | 6.08 | 5.1E-01 | 1.09 | long-day flies |
| 7.92_597.4236m/z- | 597.424 | 7.92 | 5.1E-01 | 1.11 | long-day flies |
| 9.88_850.6320m/z- | 850.632 | 9.88 | 5.1E-01 | 1.10 | long-day flies |
| 8.01_789.5542m/z- | 789.554 | 8.01 | 5.1E-01 | 1.05 | short-day flies |
| 9.81_1115.8941m/z- | 1115.894 | 9.81 | 5.1E-01 | 1.13 | short-day flies |
| 10.41_880.8349m/z+ | 880.835 | 10.41 | 5.2E-01 | 1.31 | long-day flies |
| 1.05_248.2233m/z+ | 248.223 | 1.05 | 5.2E-01 | 1.12 | long-day flies |
| 2.55_762.5581m/z+ | 762.558 | 2.55 | 5.2E-01 | 1.09 | long-day flies |
| 6.56_652.4341n+ | 670.468 | 6.56 | 5.2E-01 | 1.08 | long-day flies |
| 9.48_990.7452m/z+ | 990.745 | 9.48 | 5.2E-01 | 1.19 | long-day flies |
| 2.77_436.3406n+ | 454.375 | 2.77 | 5.2E-01 | 1.05 | long-day flies |
| 7.95_731.5004m/z+ | 731.500 | 7.95 | 5.2E-01 | 1.01 | short-day flies |
| 2.66_586.4530m/z+ | 586.453 | 2.66 | 5.3E-01 | 1.04 | long-day flies |
| 7.87_473.3989m/z+ | 473.399 | 7.87 | 5.3E-01 | 1.05 | long-day flies |
| 4.14_695.3584m/z+ | 695.358 | 4.14 | 5.3E-01 | 1.09 | long-day flies |
| 5.99_423.3262m/z- | 423.326 | 5.99 | 5.3E-01 | 1.09 | long-day flies |
| 14.07_473.2653m/z+ | 473.265 | 14.07 | 5.3E-01 | 1.02 | short-day flies |
| 9.79_849.6314m/z- | 849.631 | 9.79 | 5.3E-01 | 1.06 | long-day flies |
| 2.21_704.5163m/z+ | 704.516 | 2.21 | 5.4E-01 | 1.06 | long-day flies |
| 3.25_363.3115m/z+ | 363.312 | 3.25 | 5.4E-01 | 1.07 | long-day flies |
| 15.07_433.0063m/z+ | 433.006 | 15.07 | 5.4E-01 | 1.06 | long-day flies |
| 2.34_484.3848m/z+ | 484.385 | 2.34 | 5.5E-01 | 1.04 | long-day flies |
| 7.76_553.4208m/z- | 553.421 | 7.76 | 5.5E-01 | 1.05 | long-day flies |
| 2.28_757.4500m/z+ | 757.450 | 2.28 | 5.5E-01 | 1.12 | long-day flies |
| 5.62_797.5325m/z+ | 797.532 | 5.62 | 5.5E-01 | 1.08 | long-day flies |
| 6.34_382.3680m/z+ | 382.368 | 6.34 | 5.6E-01 | 1.06 | long-day flies |
| 7.77_489.3938m/z+ | 489.394 | 7.77 | 5.6E-01 | 1.04 | long-day flies |
| 11.78_288.0283m/z- | 288.028 | 11.78 | 5.6E-01 | 1.10 | long-day flies |
| 1.32_387.1817m/z+ | 387.182 | 1.32 | 5.6E-01 | 1.06 | long-day flies |
| 9.87_808.7357m/z+ | 808.736 | 9.87 | 5.7E-01 | 1.12 | long-day flies |
| 1.38_376.2597m/z+ | 376.260 | 1.38 | 5.7E-01 | 1.05 | short-day flies |
| 5.79_383.3108m/z+ | 383.311 | 5.79 | 5.7E-01 | 1.09 | short-day flies |
| 15.07_119.9643n+ | 162.002 | 15.07 | 5.7E-01 | 1.03 | long-day flies |
| 7.89_808.5824m/z+ | 808.582 | 7.89 | 5.8E-01 | 1.05 | short-day flies |
| 10.29_919.8461m/z+ | 919.846 | 10.29 | 5.8E-01 | 1.10 | short-day flies |
| 6.99_699.5518m/z+ | 699.552 | 6.99 | 5.8E-01 | 4.10 | long-day flies |
| 5.35_279.1605m/z+ | 279.160 | 5.35 | 5.8E-01 | 1.02 | short-day flies |
| 8.46_553.4591m/z+ | 553.459 | 8.46 | 5.9E-01 | 1.02 | long-day flies |
| 15.08_622.2226m/z+ | 622.223 | 15.08 | 5.9E-01 | 1.06 | short-day flies |
| 14.94_618.2893m/z+ | 618.289 | 14.94 | 5.9E-01 | 1.04 | short-day flies |
| 1.23_141.0163m/z- | 141.016 | 1.23 | 5.9E-01 | 1.03 | short-day flies |
| 10.27_1055.8723m/z- | 1055.872 | 10.27 | 5.9E-01 | 1.18 | long-day flies |
| 3.23_615.3467m/z+ | 615.347 | 3.23 | 5.9E-01 | 1.05 | long-day flies |
| 2.53_850.6111m/z+ | 850.611 | 2.53 | 6.0E-01 | 1.04 | short-day flies |
| 5.71_540.3266m/z+ | 540.327 | 5.71 | 6.0E-01 | 1.11 | long-day flies |
| 2.63_630.4794m/z+ | 630.479 | 2.63 | 6.0E-01 | 1.04 | long-day flies |
| 8.02_891.6707m/z- | 891.671 | 8.02 | 6.0E-01 | 1.03 | short-day flies |
| 7.65_497.3961m/z+ | 497.396 | 7.65 | 6.1E-01 | 1.02 | long-day flies |
| 2.60_674.5054m/z+ | 674.505 | 2.60 | 6.1E-01 | 1.04 | long-day flies |
| 1.80_179.1072m/z- | 179.107 | 1.80 | 6.1E-01 | 1.06 | long-day flies |
| 10.54_1055.8731m/z- | 1055.873 | 10.54 | 6.1E-01 | 1.06 | short-day flies |
| 2.20_233.1542m/z- | 233.154 | 2.20 | 6.1E-01 | 1.03 | long-day flies |
| 8.12_621.5202m/z+ | 621.520 | 8.12 | 6.1E-01 | 1.05 | long-day flies |
| 5.84_412.3782m/z+ | 412.378 | 5.84 | 6.1E-01 | 1.04 | long-day flies |
| 8.46_166.0638n+ | 167.072 | 8.46 | 6.2E-01 | 1.01 | long-day flies |
| 15.08_104.9934m/z+ | 104.993 | 15.08 | 6.2E-01 | 1.02 | long-day flies |
| 8.21_741.5535m/z+ | 741.553 | 8.21 | 6.2E-01 | 1.07 | short-day flies |
| 6.81_281.2125m/z+ | 281.213 | 6.81 | 6.2E-01 | 1.15 | short-day flies |
| 13.14_618.2893m/z+ | 618.289 | 13.14 | 6.3E-01 | 1.04 | short-day flies |
| 13.91_553.4571m/z+ | 553.457 | 13.91 | 6.3E-01 | 1.06 | short-day flies |
| 9.70_806.7244m/z+ | 806.724 | 9.70 | 6.3E-01 | 1.22 | long-day flies |
| 9.07_607.5666m/z+ | 607.567 | 9.07 | 6.3E-01 | 1.06 | long-day flies |
| 5.52_149.0242m/z+ | 149.024 | 5.52 | 6.3E-01 | 1.02 | short-day flies |
| 2.15_792.5692m/z+ | 792.569 | 2.15 | 6.3E-01 | 1.10 | long-day flies |
| 5.51_391.2847m/z+ | 391.285 | 5.51 | 6.3E-01 | 1.03 | short-day flies |
| 6.95_531.4085m/z+ | 531.409 | 6.95 | 6.3E-01 | 1.20 | long-day flies |
| 8.58_638.5733m/z+ | 638.573 | 8.58 | 6.4E-01 | 1.13 | short-day flies |
| 4.27_628.4986m/z+ | 628.499 | 4.27 | 6.4E-01 | 4.30 | long-day flies |
| 9.51_988.7308m/z+ | 988.731 | 9.51 | 6.4E-01 | 1.11 | long-day flies |
| 11.43_171.1018m/z- | 171.102 | 11.43 | 6.4E-01 | 1.02 | long-day flies |
| 15.10_128.9546m/z+ | 128.955 | 15.10 | 6.4E-01 | 1.03 | long-day flies |
| 8.24_600.5134m/z+ | 600.513 | 8.24 | 6.4E-01 | 1.05 | long-day flies |
| 4.38_256.2643m/z+ | 256.264 | 4.38 | 6.4E-01 | 1.07 | long-day flies |
| 6.86_427.3783m/z+ | 427.378 | 6.86 | 6.5E-01 | 1.05 | short-day flies |
| 10.12_824.7701m/z+ | 824.770 | 10.12 | 6.5E-01 | 1.20 | long-day flies |
| 13.76_576.2428m/z- | 576.243 | 13.76 | 6.5E-01 | 1.04 | long-day flies |
| 10.46_1115.8939m/z- | 1115.894 | 10.46 | 6.5E-01 | 1.02 | long-day flies |
| 8.46_589.5306m/z+ | 589.531 | 8.46 | 6.5E-01 | 1.02 | long-day flies |
| 1.25_162.0251m/z- | 162.025 | 1.25 | 6.5E-01 | 1.58 | long-day flies |
| 8.28_517.3929m/z- | 517.393 | 8.28 | 6.5E-01 | 1.03 | short-day flies |
| 14.64_375.1783m/z- | 375.178 | 14.64 | 6.6E-01 | 1.11 | short-day flies |
| 2.98_644.4947m/z+ | 644.495 | 2.98 | 6.6E-01 | 1.03 | short-day flies |
| 8.55_769.5882m/z+ | 769.588 | 8.55 | 6.6E-01 | 1.05 | long-day flies |
| 2.45_894.6375m/z+ | 894.638 | 2.45 | 6.6E-01 | 1.13 | long-day flies |
| 6.45_584.4540m/z+ | 584.454 | 6.45 | 6.6E-01 | 1.05 | long-day flies |
| 12.50_654.3610m/z+ | 654.361 | 12.50 | 6.6E-01 | 1.08 | short-day flies |
| 1.12_244.1921m/z+ | 244.192 | 1.12 | 6.7E-01 | 1.03 | short-day flies |
| 11.03_570.4568m/z+ | 570.457 | 11.03 | 6.7E-01 | 1.06 | short-day flies |
| 3.48_253.2165m/z- | 253.217 | 3.48 | 6.7E-01 | 1.07 | short-day flies |
| 10.00_1053.8873m/z- | 1053.887 | 10.00 | 6.9E-01 | 1.29 | short-day flies |
| 7.59_810.7020m/z+ | 810.702 | 7.59 | 6.9E-01 | 17.81 | long-day flies |
| 13.70_413.2674m/z+ | 413.267 | 13.70 | 6.9E-01 | 1.02 | long-day flies |
| 2.24_660.4896m/z+ | 660.490 | 2.24 | 7.0E-01 | 1.03 | long-day flies |
| 1.22_205.1590m/z- | 205.159 | 1.22 | 7.0E-01 | 1.02 | long-day flies |
| 2.31_528.4069m/z+ | 528.407 | 2.31 | 7.0E-01 | 1.02 | long-day flies |
| 10.24_821.8038m/z+ | 821.804 | 10.24 | 7.0E-01 | 1.06 | long-day flies |
| 8.46_107.0496m/z+ | 107.050 | 8.46 | 7.1E-01 | 1.01 | long-day flies |
| 10.35_831.6571m/z- | 831.657 | 10.35 | 7.1E-01 | 1.04 | short-day flies |
| 3.48_515.3845m/z+ | 515.385 | 3.48 | 7.1E-01 | 1.05 | long-day flies |
| 10.13_1075.8554m/z- | 1075.855 | 10.13 | 7.1E-01 | 1.06 | long-day flies |
| 10.78_1075.9173m/z+ | 1075.917 | 10.78 | 7.2E-01 | 1.04 | short-day flies |
| 8.81_579.5343m/z+ | 579.534 | 8.81 | 7.2E-01 | 1.04 | long-day flies |
| 13.59_576.2433m/z- | 576.243 | 13.59 | 7.2E-01 | 1.06 | short-day flies |
| 9.04_760.6204m/z- | 760.620 | 9.04 | 7.3E-01 | 1.19 | long-day flies |
| 12.25_654.3618m/z+ | 654.362 | 12.25 | 7.3E-01 | 1.12 | short-day flies |
| 7.36_784.5480m/z- | 784.548 | 7.36 | 7.4E-01 | 1.02 | long-day flies |
| 7.55_491.3588m/z- | 491.359 | 7.55 | 7.4E-01 | 1.03 | short-day flies |
| 3.23_557.2930m/z+ | 557.293 | 3.23 | 7.5E-01 | 1.04 | long-day flies |
| 13.81_576.2444m/z- | 576.244 | 13.81 | 7.5E-01 | 1.06 | long-day flies |
| 14.07_553.4573m/z+ | 553.457 | 14.07 | 7.6E-01 | 1.05 | long-day flies |
| 6.99_723.5884m/z+ | 723.588 | 6.99 | 7.6E-01 | 1.04 | long-day flies |
| 7.83_59.0623m/z+ | 59.062 | 7.83 | 7.7E-01 | 1.01 | short-day flies |
| 8.94_646.5386n- | 705.551 | 8.94 | 7.7E-01 | 1.01 | long-day flies |
| 1.23_485.3589m/z+ | 485.359 | 1.23 | 7.7E-01 | 1.03 | short-day flies |
| 8.58_628.5458m/z+ | 628.546 | 8.58 | 7.7E-01 | 1.04 | long-day flies |
| 7.93_621.4727m/z- | 621.473 | 7.93 | 7.8E-01 | 1.01 | short-day flies |
| 1.94_743.4326m/z+ | 743.433 | 1.94 | 7.8E-01 | 1.04 | short-day flies |
| 7.63_491.3585m/z- | 491.358 | 7.63 | 7.9E-01 | 1.06 | long-day flies |
| 9.64_1073.8515m/z- | 1073.852 | 9.64 | 7.9E-01 | 1.08 | short-day flies |
| 15.00_158.9749m/z- | 158.975 | 15.00 | 7.9E-01 | 1.01 | short-day flies |
| 8.09_684.2042m/z+ | 684.204 | 8.09 | 7.9E-01 | 1.05 | short-day flies |
| 10.02_941.7846m/z- | 941.785 | 10.02 | 8.0E-01 | 1.01 | short-day flies |
| 9.75_705.5508m/z- | 705.551 | 9.75 | 8.0E-01 | 1.03 | long-day flies |
| 6.29_711.4948m/z+ | 711.495 | 6.29 | 8.0E-01 | 1.05 | short-day flies |
| 9.15_773.6419m/z+ | 773.642 | 9.15 | 8.0E-01 | 1.04 | short-day flies |
| 7.79_610.1849m/z+ | 610.185 | 7.79 | 8.0E-01 | 1.07 | long-day flies |
| 1.07_202.1813m/z+ | 202.181 | 1.07 | 8.0E-01 | 1.01 | long-day flies |
| 10.49_1032.8677m/z+ | 1032.868 | 10.49 | 8.0E-01 | 1.02 | long-day flies |
| 14.71_618.2900m/z+ | 618.290 | 14.71 | 8.0E-01 | 1.01 | long-day flies |
| 9.61_705.5492m/z- | 705.549 | 9.61 | 8.1E-01 | 1.03 | short-day flies |
| 5.14_465.3093m/z- | 465.309 | 5.14 | 8.1E-01 | 4.31 | short-day flies |
| 4.63_900.5357m/z+ | 900.536 | 4.63 | 8.1E-01 | 1.02 | short-day flies |
| 10.28_873.7041m/z- | 873.704 | 10.28 | 8.1E-01 | 1.02 | short-day flies |
| 5.59_788.5524m/z+ | 788.552 | 5.59 | 8.1E-01 | 2.06 | short-day flies |
| 9.97_1055.9025m/z+ | 1055.902 | 9.97 | 8.1E-01 | 1.15 | short-day flies |
| 13.77_616.2751m/z- | 616.275 | 13.77 | 8.2E-01 | 1.11 | short-day flies |
| 8.97_821.6379m/z- | 821.638 | 8.97 | 8.2E-01 | 1.05 | short-day flies |
| 15.07_600.2405m/z+ | 600.241 | 15.07 | 8.2E-01 | 1.01 | short-day flies |
| 9.39_308.2071m/z+ | 308.207 | 9.39 | 8.2E-01 | 1.01 | long-day flies |
| 2.84_820.6028m/z+ | 820.603 | 2.84 | 8.3E-01 | 1.06 | long-day flies |
| 3.22_326.3790m/z+ | 326.379 | 3.22 | 8.3E-01 | 1.16 | short-day flies |
| 9.63_892.7331m/z+ | 892.733 | 9.63 | 8.3E-01 | 1.03 | short-day flies |
| 15.07_515.0096m/z+ | 515.010 | 15.07 | 8.3E-01 | 1.01 | short-day flies |
| 5.57_629.4738m/z+ | 629.474 | 5.57 | 8.3E-01 | 1.04 | long-day flies |
| 11.66_680.4801m/z+ | 680.480 | 11.66 | 8.3E-01 | 1.02 | long-day flies |
| 5.50_167.0348m/z+ | 167.035 | 5.50 | 8.4E-01 | 1.01 | short-day flies |
| 14.93_375.1789m/z- | 375.179 | 14.93 | 8.4E-01 | 1.02 | long-day flies |
| 9.85_1073.8504m/z- | 1073.850 | 9.85 | 8.4E-01 | 1.01 | long-day flies |
| 7.65_167.0718m/z+ | 167.072 | 7.65 | 8.4E-01 | 1.01 | long-day flies |
| 7.26_837.6206m/z+ | 837.621 | 7.26 | 8.5E-01 | 1.01 | short-day flies |
| 8.09_619.4691m/z- | 619.469 | 8.09 | 8.5E-01 | 1.03 | short-day flies |
| 6.56_711.4945m/z+ | 711.495 | 6.56 | 8.5E-01 | 1.01 | long-day flies |
| 2.50_806.5847m/z+ | 806.585 | 2.50 | 8.5E-01 | 1.01 | long-day flies |
| 5.55_570.4163n+ | 588.447 | 5.55 | 8.5E-01 | 1.07 | long-day flies |
| 9.17_699.5961m/z+ | 699.596 | 9.17 | 8.6E-01 | 1.01 | short-day flies |
| 14.12_576.2431m/z- | 576.243 | 14.12 | 8.7E-01 | 1.01 | long-day flies |
| 8.88_655.5512m/z- | 655.551 | 8.88 | 8.7E-01 | 1.03 | long-day flies |
| 9.86_782.7248m/z+ | 782.725 | 9.86 | 8.8E-01 | 1.13 | long-day flies |
| 10.78_1055.8727m/z- | 1055.873 | 10.78 | 8.8E-01 | 1.06 | long-day flies |
| 9.68_849.6332m/z- | 849.633 | 9.68 | 8.8E-01 | 1.01 | short-day flies |
| 1.24_381.1122m/z- | 381.112 | 1.24 | 8.8E-01 | 1.01 | long-day flies |
| 8.09_792.5524m/z+ | 792.552 | 8.09 | 8.9E-01 | 1.02 | short-day flies |
| 7.25_1006.7700m/z+ | 1006.770 | 7.25 | 8.9E-01 | 1.04 | short-day flies |
| 3.69_279.2322m/z- | 279.232 | 3.69 | 8.9E-01 | 1.04 | long-day flies |
| 13.78_553.4579m/z+ | 553.458 | 13.78 | 8.9E-01 | 1.03 | short-day flies |
| 1.21_163.0339n+ | 205.081 | 1.21 | 8.9E-01 | 1.46 | long-day flies |
| 8.01_777.5913m/z- | 777.591 | 8.01 | 8.9E-01 | 1.00 | long-day flies |
| 8.16_584.5116m/z+ | 584.512 | 8.16 | 9.0E-01 | 1.08 | long-day flies |
| 10.28_903.8263n+ | 904.834 | 10.28 | 9.0E-01 | 1.01 | short-day flies |
| 7.88_203.1078m/z+ | 203.108 | 7.88 | 9.0E-01 | 1.00 | long-day flies |
| 2.69_542.4267m/z+ | 542.427 | 2.69 | 9.0E-01 | 1.01 | long-day flies |
| 1.23_218.2125m/z+ | 218.213 | 1.23 | 9.1E-01 | 1.29 | long-day flies |
| 15.07_186.9965m/z+ | 186.997 | 15.07 | 9.1E-01 | 1.00 | long-day flies |
| 3.16_574.3213m/z+ | 574.321 | 3.16 | 9.1E-01 | 1.03 | long-day flies |
| 6.97_878.5770m/z+ | 878.577 | 6.97 | 9.1E-01 | 1.10 | short-day flies |
| 2.58_718.5318m/z+ | 718.532 | 2.58 | 9.1E-01 | 1.01 | short-day flies |
| 15.00_116.9232m/z- | 116.923 | 15.00 | 9.2E-01 | 1.00 | short-day flies |
| 13.49_59.0130m/z- | 59.013 | 13.49 | 9.2E-01 | 1.04 | short-day flies |
| 7.96_395.3884m/z- | 395.388 | 7.96 | 9.2E-01 | 1.16 | short-day flies |
| 6.95_589.4605m/z+ | 589.460 | 6.95 | 9.2E-01 | 1.06 | long-day flies |
| 8.22_589.5464m/z+ | 589.546 | 8.22 | 9.2E-01 | 1.01 | short-day flies |
| 7.08_681.4726m/z+ | 681.473 | 7.08 | 9.2E-01 | 1.06 | long-day flies |
| 2.04_452.3220m/z+ | 452.322 | 2.04 | 9.2E-01 | 1.45 | short-day flies |
| 8.00_605.4770m/z- | 605.477 | 8.00 | 9.3E-01 | 1.01 | long-day flies |
| 10.09_793.7698m/z+ | 793.770 | 10.09 | 9.3E-01 | 1.02 | long-day flies |
| 4.11_636.2978n+ | 637.305 | 4.11 | 9.4E-01 | 1.05 | short-day flies |
| 13.39_553.4581m/z+ | 553.458 | 13.39 | 9.4E-01 | 1.00 | short-day flies |
| 10.15_865.8025m/z+ | 865.802 | 10.15 | 9.5E-01 | 1.06 | long-day flies |
| 2.43_274.2749m/z+ | 274.275 | 2.43 | 9.5E-01 | 1.63 | short-day flies |
| 5.57_829.5786m/z+ | 829.579 | 5.57 | 9.6E-01 | 1.76 | short-day flies |
| 10.50_960.8312m/z+ | 960.831 | 10.50 | 9.6E-01 | 1.00 | long-day flies |
| 1.25_203.0639m/z- | 203.064 | 1.25 | 9.6E-01 | 1.40 | long-day flies |
| 9.22_389.2715m/z- | 389.271 | 9.22 | 9.6E-01 | 1.01 | short-day flies |
| 8.56_450.4300m/z+ | 450.430 | 8.56 | 9.7E-01 | 1.00 | short-day flies |
| 1.67_246.2438m/z+ | 246.244 | 1.67 | 9.7E-01 | 1.48 | short-day flies |
| 9.96_796.7414m/z+ | 796.741 | 9.96 | 9.7E-01 | 1.03 | long-day flies |
| 8.81_614.5672m/z+ | 614.567 | 8.81 | 9.7E-01 | 1.00 | long-day flies |
| 2.28_572.4371m/z+ | 572.437 | 2.28 | 9.8E-01 | 1.00 | short-day flies |
| 10.49_941.7860m/z- | 941.786 | 10.49 | 9.8E-01 | 1.03 | long-day flies |
| 7.66_492.4417m/z+ | 492.442 | 7.66 | 9.9E-01 | 1.01 | short-day flies |
| 8.96_507.3753m/z- | 507.375 | 8.96 | 9.9E-01 | 1.04 | long-day flies |
| 2.96_605.3227m/z+ | 605.323 | 2.96 | 9.9E-01 | 1.10 | long-day flies |
| 9.63_559.4399m/z- | 559.440 | 9.63 | 9.9E-01 | 1.01 | short-day flies |
| 2.17_748.5431m/z+ | 748.543 | 2.17 | 9.9E-01 | 1.00 | long-day flies |
| 7.77_237.1133m/z+ | 237.113 | 7.77 | 9.9E-01 | 1.00 | long-day flies |
| 6.30_421.3105m/z- | 421.311 | 6.30 | 1.0E+00 | 1.00 | long-day flies |

**Table S4**

Water-soluble metabolites identified in the brains of Canton-S flies reared under short-day and long-day conditions. The electrospray ionization method used for each metabolite is shown in brackets. ANOVA p-values were calculated to highlight significant differences (p ≤ 0.05) between the two groups of flies, and these are shown in green. Fold changes on a logarithmic scale were calculated by dividing the mean values from the six replicates, and these values are shown in the heatmap (the highest value is highlighted in red, zero in white and the lowest in blue). The data represent the mean values of the normalized peak areas and RSD (n = 6).

| Compound | | short day | | long day | | short day vs long day | |
| --- | --- | --- | --- | --- | --- | --- | --- |
| Class | **Name** | Mean1 | RSD [%] | Mean1 | RSD [%] | log2fold change | p |
| non-ess. AA | **Alanine (pos.)** | 1.12 | 18 | 1 | 14 | 0.2 | 0.3396 |
| **Arginine (pos.)** | 1.20 | 4 | 1 | 8 | 0.3 | 0.0051 |
| **Asparagine (pos.)** | 1.14 | 21 | 1 | 17 | 0.2 | 0.3548 |
| **Aspartate (pos.)** | 1.14 | 12 | 1 | 7 | 0.2 | 0.0789 |
| **Glutamate (pos.)** | 1.19 | 16 | 1 | 15 | 0.3 | 0.1471 |
| **Glutamine (pos.)** | 0.60 | 14 | 1 | 16 | -0.7 | 0.0001 |
| **Glycine (neg.)** | 1.16 | 23 | 1 | 22 | 0.2 | 0.3809 |
| **Proline (pos.)** | 0.71 | 11 | 1 | 14 | -0.5 | 0.0009 |
| **Serine (pos.)** | 0.85 | 27 | 1 | 18 | -0.2 | 0.2731 |
| **Tyrosine (pos.)** | 0.97 | 17 | 1 | 9 | 0.0 | 0.7226 |
|  | **Isoleucine (pos.)** | 1.10 | 31 | 1 | 24 | 0.1 | 0.6426 |
| **Leucine (pos.)** | 1.08 | 25 | 1 | 9 | 0.1 | 0.5598 |
| **Lysine (pos.)** | 0.82 | 25 | 1 | 53 | -0.3 | 0.4557 |
| **Methionine (pos.)** | 0.56 | 62 | 1 | 27 | -0.8 | 0.0324 |
| **Phenylalanine (pos.)** | 1.17 | 20 | 1 | 13 | 0.2 | 0.2191 |
| **Threonine (pos.)** | 0.81 | 33 | 1 | 30 | -0.3 | 0.3043 |
| **Tryptophan (pos.)** | 0.90 | 55 | 1 | 50 | -0.2 | 0.7591 |
| Ac-AA | **N-Ac-Asp (neg.)** | 1.82 | 4 | 1 | 11 | 0.9 | 0.0000 |
| **N-Ac-Glu (neg.)** | 0.87 | 4 | 1 | 16 | -0.2 | 0.0997 |
| **N-Ac-Lys (pos.)** | 0.61 | 35 | 1 | 33 | -0.7 | 0.0229 |
| **N-Acetylornithine (pos.)** | 0.64 | 38 | 1 | 22 | -0.6 | 0.0232 |
| Glu-AA | **GluCys (pos.)** | 3.92 | 62 | 1 | 15 | 2.0 | 0.0295 |
| **GluGln** | 0.08 | 42 | 1 | 145 | -3.6 | 0.0000 |
| **GluGlu** | 0.32 | 104 | 1 | 99 | -1.7 | 0.0114 |
| Glu-Metabs | **5-Oxoproline (neg.)** | 3.21 | 67 | 1 | 7 | 1.7 | 0.0311 |
| Pro-Metabs | **GlyPro (pos.)** | 1.10 | 48 | 1 | 19 | 0.1 | 0.7225 |
| Arg-Metabs | **Dimethylarginine (pos.)** | 3.37 | 60 | 1 | 5 | 1.8 | 0.0304 |
| **Guanidinoacetate (pos.)** | 1.04 | 65 | 1 | 59 | 0.1 | 0.9307 |
| **Creatine (pos.)** | 0.45 | 58 | 1 | 239 | -1.2 | 0.3349 |
| **Creatinine (pos.)** | 0.93 | 71 | 1 | 151 | -0.1 | 0.9296 |
| **Phosphocreatine (pos.)** | 0.62 | 69 | 1 | 249 | -0.7 | 0.6379 |
| **1-Methylhistidine (pos.)** | 0.46 | 66 | 1 | 21 | -1.1 | 0.0044 |
| **Urocanic Acid (pos.)** | 1.06 | 58 | 1 | 41 | 0.1 | 0.8592 |
| Ser Metabs | **Choline (+)** | 0.94 | 46 | 1 | 21 | -0.1 | 0.7770 |
| **Phosphocholine (+)** | 0.56 | 23 | 1 | 20 | -0.8 | 0.0004 |
| **Acetylcholine (+)** | 0.68 | 11 | 1 | 9 | -0.5 | 0.0001 |
| **CDP-Choline (+)** | 0.95 | 22 | 1 | 23 | -0.1 | 0.7267 |
| **Phosphoethanolamine (pos.)** | 0.49 | 81 | 1 | 44 | -1.0 | 0.0354 |
| **CDP-Ethanolamine (pos.)** | 1.36 | 18 | 1 | 17 | 0.4 | 0.0498 |
| **Dimethylglycine (pos.)** | 1.11 | 42 | 1 | 10 | 0.2 | 0.6147 |
| **Betaine (+)** | 0.94 | 24 | 1 | 11 | -0.1 | 0.5834 |
| Lys-Metabs | **5-Hydroxylysine (pos.)** | 0.36 | 33 | 1 | 77 | -1.5 | 0.0018 |
| **Pipecolate (pos.)** | 0.97 | 22 | 1 | 35 | 0.0 | 0.8906 |
| **Aminoadipic Acid (pos.)** | 0.33 | 57 | 1 | 269 | -1.6 | 0.1657 |
| **Oxadipinate (neg.)** | 1.46 | 44 | 1 | 33 | 0.5 | 0.2462 |
| Phe Metabs | **Phenylpyruvate (neg.)** | 1.40 | 18 | 1 | 4 | 0.5 | 0.0080 |
| **Phenyllactate (neg.)** | 1.34 | 27 | 1 | 16 | 0.4 | 0.1106 |
| **Hydroxyphenylpyruvate (neg.)** | 1.45 | 19 | 1 | 4 | 0.5 | 0.0071 |
| **Homogentisate** | 0.33 | 57 | 1 | 57 | -1.6 | 0.0004 |
| Trp Metabs | **Kynurenine (pos.)** | 0.36 | 38 | 1 | 97 | -1.5 | 0.0067 |
| **Kynurenate (neg.)** | 11.39 | 65 | 1 | 2 | 3.5 | 0.0131 |
| **Quinolinate (neg.)** | 0.23 | 46 | 1 | 168 | -2.1 | 0.0040 |
| "S"-Metabs | **Cysteinesulfate (neg.)** | 1.69 | 40 | 1 | 8 | 0.8 | 0.0152 |
| **Methioninesulfoxide** | 0.51 | 26 | 1 | 30 | -1.0 | 0.0006 |
| **GSH (pos.)** | 2.28 | 48 | 1 | 19 | 1.2 | 0.0410 |
| **GSSG (pos.)** | 0.49 | 57 | 1 | 242 | -1.0 | 0.4208 |
| **Taurine (neg.)** | 0.80 | 16 | 1 | 17 | -0.3 | 0.0512 |
| Yang Cycle | **Methylthioadenosine (pos.)** | 0.87 | 24 | 1 | 26 | -0.2 | 0.3891 |
| **a-Keto-glutaramate (neg.)** | 1.68 | 61 | 1 | 14 | 0.7 | 0.1911 |
| Polyamines | **Putrescine (pos.)** | 2.05 | 23 | 1 | 13 | 1.0 | 0.0024 |
| **N-Acetylputrescine (pos.)** | 2.76 | 23 | 1 | 19 | 1.5 | 0.0014 |
| **Acetylspermidine** | 2.99 | 31 | 1 | 5 | 1.6 | 0.0011 |
| Carbohydrates | **Erythrol (neg.)** | 0.25 | 11 | 1 | 93 | -2.0 | 0.0001 |
| **Erythronate** | 1.13 | 47 | 1 | 19 | 0.2 | 0.6335 |
| **Ribitol (neg.)** | 1.66 | 68 | 1 | 12 | 0.7 | 0.2391 |
| **Aldohexose (neg.)** | 0.22 | 13 | 1 | 80 | -2.2 | 0.0000 |
| **Fructose (neg.)** | 0.32 | 184 | 1 | 203 | -1.7 | 0.1349 |
| **Gluconate (neg.)** | 0.40 | 27 | 1 | 51 | -1.3 | 0.0004 |
| **Glucosamine (pos.)** | 0.16 | 18 | 1 | 77 | -2.6 | 0.0000 |
| **Glucosamine-P (pos.)** | 1.92 | 13 | 1 | 11 | 0.9 | 0.0002 |
| **UDP-Glc (neg.)** | 0.78 | 65 | 1 | 109 | -0.3 | 0.6658 |
| **UDP-GlcNAc (neg.)** | 0.20 | 35 | 1 | 367 | -2.3 | 0.0579 |
| **UDP-Glucuronate (neg.)** | 0.06 | 114 | 1 | 1444 | -4.2 | 0.0419 |
| Glycolysis | **Hexose-P (neg.)** | 0.17 | 21 | 1 | 67 | -2.6 | 0.0000 |
| **Glyceral/-on-P (neg.)** | 0.47 | 38 | 1 | 163 | -1.1 | 0.2052 |
| **2-/3-Phosphoglycerate** | 0.21 | 94 | 1 | 217 | -2.3 | 0.0087 |
| **Phosphoenolpyruvate (neg.)** | 0.06 | 84 | 1 | 356 | -4.0 | 0.0000 |
| **Pyruvate (neg.)** | 0.64 | 26 | 1 | 118 | -0.6 | 0.3685 |
| **Lactate (neg.)** | 0.62 | 33 | 1 | 43 | -0.7 | 0.0416 |
| Glycerol Metabs | **Glycerol-3-P (neg.)** | 0.25 | 8 | 1 | 88 | -2.0 | 0.0001 |
| **GPC** | 1.48 | 11 | 1 | 38 | 0.6 | 0.1285 |
| **GPEA** | 1.19 | 19 | 1 | 19 | 0.2 | 0.2424 |
| **GPI** | 0.85 | 111 | 1 | 80 | -0.2 | 0.7933 |
| **GPS** | 1.92 | 13 | 1 | 11 | 0.9 | 0.0002 |
| PPP | **Phosphogluconate (neg.)** | 0.00 | 24 | 1 | 53341956 | -18.3 | 0.2388 |
| **Pentose-5-P (neg.)** | 0.69 | 38 | 1 | 35 | -0.5 | 0.0946 |
| **Sedoheptulose-7-phosphate (neg.)** | 0.00 | 24 | 1 | 29589438 | -19.0 | 0.0062 |
| **Erythrose-4-P (neg.)** | 0.59 | 40 | 1 | 32 | -0.8 | 0.0170 |
| TCA Cycle | **Citrate (neg.)** | 1.47 | 23 | 1 | 6 | 0.6 | 0.0166 |
| **Itaconate (neg.)** | 0.67 | 12 | 1 | 23 | -0.6 | 0.0033 |
| **Aconitate (neg.)** | 0.82 | 12 | 1 | 19 | -0.3 | 0.0741 |
| **a-Ketoglutarate (neg.)** | 1.10 | 38 | 1 | 38 | 0.1 | 0.7392 |
| **Succinate (neg.)** | 0.77 | 10 | 1 | 15 | -0.4 | 0.0066 |
| **Fumarate (neg.)** | 0.96 | 6 | 1 | 14 | -0.1 | 0.5510 |
| **Malate (neg.)** | 0.77 | 20 | 1 | 23 | -0.4 | 0.0628 |
| **Oxaloacetate (neg.)** | 1.21 | 22 | 1 | 14 | 0.3 | 0.1922 |
| CoA Metabs | **Pantothenate (neg.)** | 1.34 | 60 | 1 | 9 | 0.4 | 0.3723 |
| **Phosphopantothenate (neg.)** | 2.38 | 83 | 1 | 26 | 1.3 | 0.1771 |
| Carboxylic Acids | **Acetoacetate (neg.)** | 0.98 | 22 | 1 | 27 | 0.0 | 0.9275 |
| **2-Hydroxybutyrate** | 1.19 | 19 | 1 | 7 | 0.3 | 0.1129 |
| **3-Hydroxybutyrate** | 1.21 | 19 | 1 | 10 | 0.3 | 0.1017 |
| **3-Hydroxyglutarate** | 0.67 | 7 | 1 | 29 | -0.6 | 0.0074 |
| **2-Hydroxyglutarate** | 0.67 | 7 | 1 | 29 | -0.6 | 0.0074 |
| **3-Hydroxymethylglutarate** | 0.16 | 28 | 1 | 117 | -2.6 | 0.0000 |
| **3-Hydroxyvalerate** | 1.30 | 19 | 1 | 5 | 0.4 | 0.0308 |
| **3-Methyl-2-oxobutanoate** | 1.11 | 26 | 1 | 6 | 0.2 | 0.4138 |
| Acylcarnitines | **Carnitine (+)** | 0.46 | 19 | 1 | 48 | -1.1 | 0.0012 |
| **AC-(02:0)** | 0.29 | 14 | 1 | 59 | -1.8 | 0.0000 |
| **AC-(04:0)** | 0.39 | 34 | 1 | 23 | -1.4 | 0.0000 |
| **AC-(05:0)** | 1.35 | 31 | 1 | 24 | 0.4 | 0.1948 |
| **AC-(06:0)** | 0.98 | 39 | 1 | 35 | 0.0 | 0.9394 |
| Urea Cycle | **Citrulline (pos.)** | 1.73 | 41 | 1 | 14 | 0.8 | 0.0607 |
| **Ornithine (pos.)** | 0.76 | 34 | 1 | 26 | -0.4 | 0.1520 |
| **Homoarginine** | 0.68 | 27 | 1 | 42 | -0.6 | 0.0820 |
| Pyrimidines | **Carbamoylaspartate (neg.)** | 1.61 | 9 | 1 | 14 | 0.7 | 0.0011 |
| **Dihydroorotate (neg.)** | 0.12 | 62 | 1 | 204 | -3.1 | 0.0000 |
| **UMP (neg.)** | 0.47 | 39 | 1 | 100 | -1.1 | 0.0626 |
| **UDP (neg.)** | 0.50 | 60 | 1 | 160 | -1.0 | 0.2603 |
| **CMP (pos.)** | 0.65 | 28 | 1 | 62 | -0.6 | 0.1310 |
| **CDP (pos.)** | 0.51 | 45 | 1 | 120 | -1.0 | 0.1630 |
| **Cytidine (pos.)** | 1.98 | 18 | 1 | 16 | 1.0 | 0.0017 |
| **dCytidine (pos.)** | 1.43 | 51 | 1 | 10 | 0.5 | 0.2342 |
| **Uridine (neg.)** | 0.57 | 25 | 1 | 38 | -0.8 | 0.0071 |
| **Uracil (neg.)** | 0.74 | 12 | 1 | 21 | -0.4 | 0.0153 |
| Purines | **IMP (neg.)** | 0.37 | 28 | 1 | 64 | -1.4 | 0.0007 |
| **AMP (pos.)** | 0.98 | 5 | 1 | 18 | 0.0 | 0.8543 |
| **ADP (pos.)** | 0.79 | 28 | 1 | 70 | -0.3 | 0.4900 |
| **ATP (pos.)** | 0.36 | 62 | 1 | 321 | -1.5 | 0.2942 |
| **GMP (pos.)** | 0.87 | 3 | 1 | 25 | -0.2 | 0.2552 |
| **GDP (pos.)** | 0.30 | 166 | 1 | 337 | -1.7 | 0.2381 |
| **dADP (pos.)** | 0.09 | 200 | 1 | 1614 | -3.4 | 0.2651 |
| **Adenine (pos.)** | 0.84 | 13 | 1 | 19 | -0.3 | 0.1116 |
| **Adenosine (pos.)** | 1.31 | 11 | 1 | 26 | 0.4 | 0.1165 |
| **Guanine (pos.)** | 4.69 | 74 | 1 | 4 | 2.2 | 0.0428 |
| **Guanosine (pos.)** | 2.28 | 75 | 1 | 3 | 1.2 | 0.1334 |
| **Inosine (pos.)** | 0.64 | 35 | 1 | 30 | -0.6 | 0.0296 |
| **Hypoxanthine (neg.)** | 1.13 | 47 | 1 | 19 | 0.2 | 0.6370 |
| **Xanthine (neg.)** | 4.56 | 53 | 1 | 3 | 2.2 | 0.0098 |
| **Uric Acid (neg.)** | 13.34 | 71 | 1 | 1 | 3.7 | 0.0175 |
|  | **Biopterin (pos.)** | 0.24 | 86 | 1 | 106 | -2.0 | 0.0011 |
| Nicotinamides | **Nicotinate (neg.)** | 0.78 | 44 | 1 | 32 | -0.4 | 0.3042 |
| **mNAM (pos.)** | 3.46 | 122 | 1 | 21 | 1.8 | 0.2369 |
| **NAD (+)** | 0.67 | 20 | 1 | 95 | -0.6 | 0.3223 |
| **NADP (+)** | 0.07 | 200 | 1 | 2105 | -3.9 | 0.2073 |
| Flavines | **Riboflavin (pos.)** | 8.85 | 61 | 1 | 4 | 3.1 | 0.0104 |
| **FAD (pos.)** | 1.40 | 37 | 1 | 22 | 0.5 | 0.1869 |
| Vitamins | **Ascorbate (neg.)** | 0.77 | 27 | 1 | 18 | -0.4 | 0.0866 |
| **2,3-Diketogulonic Acid** | 1.51 | 21 | 1 | 6 | 0.6 | 0.0078 |
| **Pyridoxine (pos.)** | 0.49 | 55 | 1 | 140 | -1.0 | 0.1837 |
| **Pyridoxal (pos.)** | 0.68 | 13 | 1 | 11 | -0.6 | 0.0003 |
| **Thiamine (+)** | 0.38 | 108 | 1 | 298 | -1.4 | 0.3132 |
